# Supplementary material for: Full-length direct RNA sequencing uncovers stress-granule dependent RNA decay upon cellular stress
Source: bioRxiv preprint, doi:10.1101/2023.08.31.555629, version 3 (2024-08-27)
Supplement: Supplementary Table 3 [file 555629_file05.xlsx]

## Sheet: Diff.Exp - DESeq2
Differential expression analysis using DESeq2 for arsenite-treated vs control libraries
Gene ID	baseMean	log2FoldChange	lfcSE	stat	pvalue	padj	Gene name
ENSG00000173110	71.9723	5.58509	0.56987	9.80063	1.11882e-22	1.10965e-18	HSPA6
ENSG00000132002	514.694	1.87631	0.227839	8.23525	1.79189e-16	8.88598e-13	DNAJB1
ENSG00000204388	229.402	2.76903	0.365526	7.57547	3.57821e-14	1.18296e-10	HSPA1B
ENSG00000204389	667.404	1.75555	0.236951	7.40892	1.27334e-13	3.15725e-10	HSPA1A
ENSG00000187621	21.7533	4.70517	0.772485	6.09095	1.1224e-09	2.2264e-06	TCL6
ENSG00000013441	63.2023	1.88344	0.329485	5.71631	1.08861e-08	1.79948e-05	CLK1
ENSG00000170345	226.254	5.15093	0.925176	5.56751	2.584e-08	3.66116e-05	FOS
ENSG00000163660	67.487	1.81731	0.331402	5.4837	4.16519e-08	5.1638e-05	CCNL1
ENSG00000249790	22.9263	2.71416	0.522621	5.19336	2.0653e-07	0.000227596	AC092490.1
ENSG00000087074	62.9379	1.95319	0.390957	4.99592	5.85573e-07	0.000580771	PPP1R15A
ENSG00000148926	65.3645	1.79189	0.379448	4.72236	2.33118e-06	0.00210188	ADM
ENSG00000187193	93.2665	1.69272	0.387429	4.36911	1.24755e-05	0.010311	MT1X
ENSG00000175197	13.2308	3.0919	0.724107	4.26995	1.95518e-05	0.0149165	DDIT3
ENSG00000118503	29.3797	-2.38312	0.573418	-4.15599	3.23876e-05	0.0229443	TNFAIP3
ENSG00000178977	12.38	2.95578	0.713946	4.14006	3.47208e-05	0.0229574	LINC00324
ENSG00000180447	115.285	-1.10767	0.276231	-4.00995	6.07314e-05	0.0376459	GAS1
ENSG00000225614	10.7574	-3.16817	0.810431	-3.90925	9.25843e-05	0.0540148	ZNF469
ENSG00000156976	221.545	0.878367	0.227709	3.8574	0.000114599	0.0631441	EIF4A2
ENSG00000168209	288.682	0.871564	0.233386	3.73443	0.000188142	0.0982101	DDIT4
ENSG00000119669	50.8691	-1.77859	0.479758	-3.70727	0.000209502	0.103892	IRF2BPL
ENSG00000111011	64.659	0.999372	0.306247	3.26328	0.00110129	0.520126	RSRC2
ENSG00000128016	50.0819	1.57484	0.49023	3.21245	0.00131606	0.552716	ZFP36
ENSG00000167522	30.739	-1.37404	0.42834	-3.20781	0.00133749	0.552716	ANKRD11
ENSG00000169926	40.6308	-1.26654	0.394065	-3.21404	0.00130882	0.552716	KLF13
ENSG00000185567	48.6815	-1.24662	0.394251	-3.162	0.00156687	0.597702	AHNAK2
ENSG00000198576	13.912	2.43309	0.768301	3.16685	0.001541	0.597702	ARC
ENSG00000169429	46.4985	-5.22755	1.66084	-3.14754	0.00164651	0.604818	CXCL8
ENSG00000261889	8.03648	2.56008	0.828009	3.09185	0.00198913	0.704577	AC108134.2
ENSG00000163545	11.714	-2.66841	0.880114	-3.03189	0.00243026	0.831147	NUAK2
ENSG00000124145	34.9552	-1.60279	0.537049	-2.98444	0.00284097	0.900902	SDC4
ENSG00000197943	30.1018	1.21709	0.408771	2.97743	0.00290672	0.900902	PLCG2
ENSG00000251209	14.8829	1.67532	0.561488	2.98372	0.00284771	0.900902	LINC00923
ENSG00000000003	91.4724	0.0647202	0.274801	0.235516	0.813808	0.999879	TSPAN6
ENSG00000000419	111.386	-0.084878	0.272462	-0.311522	0.755404	0.999879	DPM1
ENSG00000000460	27.7493	-0.0179501	0.402338	-0.0446146	0.964415	0.999879	C1orf112
ENSG00000000971	71.7933	0.125975	0.37159	0.339017	0.734597	0.999879	CFH
ENSG00000001036	168.496	0.136434	0.275764	0.494749	0.620778	0.999879	FUCA2
ENSG00000001084	43.3107	-0.155174	0.361417	-0.429349	0.667669	0.999879	GCLC
ENSG00000001167	14.0604	-0.381339	0.538631	-0.707978	0.478959	0.999879	NFYA
ENSG00000001461	19.5013	-0.0421446	0.459789	-0.0916609	0.926967	0.999879	NIPAL3
ENSG00000001497	143.379	-0.0394025	0.247696	-0.159076	0.873609	0.999879	LAS1L
ENSG00000001617	72.4544	-0.296473	0.288673	-1.02702	0.304411	0.999879	SEMA3F
ENSG00000001629	35.6656	-0.121155	0.379212	-0.319492	0.749353	0.999879	ANKIB1
ENSG00000001630	124.109	0.0317673	0.296192	0.107252	0.914589	0.999879	CYP51A1
ENSG00000001631	14.1951	-0.718833	0.553783	-1.29804	0.194273	0.999879	KRIT1
ENSG00000002016	6.64228	0.597997	0.789408	0.757526	0.448735	0.999879	RAD52
ENSG00000002330	123.244	0.351032	0.260598	1.34703	0.177972	0.999879	BAD
ENSG00000002549	77.4272	-0.135402	0.300578	-0.450472	0.65237	0.999879	LAP3
ENSG00000002586	215.939	0.0681437	0.237951	0.286377	0.774589	0.999879	CD99
ENSG00000002726	6.76433	0.301804	0.96462	0.312874	0.754377	0.999879	AOC1
ENSG00000002822	33.3322	-0.32487	0.378001	-0.859441	0.390097	0.999879	MAD1L1
ENSG00000002834	202.888	-0.27072	0.34113	-0.793598	0.427429	0.999879	LASP1
ENSG00000002919	23.8229	0.252842	0.473608	0.533863	0.593436	0.999879	SNX11
ENSG00000002933	8.79964	-0.0836859	1.61987	-0.051662	0.958798	0.999879	TMEM176A
ENSG00000003056	132.225	-0.184871	0.295257	-0.626136	0.531226	0.999879	M6PR
ENSG00000003096	61.8835	0.000479505	0.320959	0.00149398	0.998808	0.999879	KLHL13
ENSG00000003249	15.9687	0.139187	0.530389	0.262424	0.792994	0.999879	DBNDD1
ENSG00000003393	10.1197	-0.795695	0.631417	-1.26017	0.207607	0.999879	ALS2
ENSG00000003402	30.8389	-0.340707	0.390767	-0.871894	0.383266	0.999879	CFLAR
ENSG00000003436	94.9852	0.166349	0.336359	0.494558	0.620912	0.999879	TFPI
ENSG00000003509	18.0371	0.2546	0.496209	0.51309	0.607888	0.999879	NDUFAF7
ENSG00000003756	49.1636	0.342609	0.333897	1.02609	0.304849	0.999879	RBM5
ENSG00000003989	17.408	-0.784756	0.531576	-1.47628	0.139868	0.999879	SLC7A2
ENSG00000004059	234.117	-0.0293748	0.220632	-0.13314	0.894083	0.999879	ARF5
ENSG00000004139	6.81445	0.405888	0.744473	0.545201	0.585615	0.999879	SARM1
ENSG00000004142	181.085	-0.0678912	0.248504	-0.2732	0.7847	0.999879	POLDIP2
ENSG00000004399	42.663	0.186895	0.443216	0.42168	0.673259	0.999879	PLXND1
ENSG00000004455	485.676	-0.0517697	0.229394	-0.22568	0.821451	0.999879	AK2
ENSG00000004478	503.043	0.0917399	0.201568	0.455131	0.649015	0.999879	FKBP4
ENSG00000004487	154.44	-0.126038	0.268092	-0.470129	0.638263	0.999879	KDM1A
ENSG00000004534	25.5085	-0.308724	0.419156	-0.736538	0.461403	0.999879	RBM6
ENSG00000004660	31.6128	-0.385279	0.404919	-0.951496	0.341353	0.999879	CAMKK1
ENSG00000004700	46.3353	0.0132402	0.35777	0.0370075	0.970479	0.999879	RECQL
ENSG00000004766	21.8984	-0.157427	0.465616	-0.338105	0.735284	0.999879	VPS50
ENSG00000004779	305.942	0.160451	0.216588	0.740813	0.458807	0.999879	NDUFAB1
ENSG00000004799	71.1482	0.0312157	0.39672	0.0786845	0.937284	0.999879	PDK4
ENSG00000004864	85.682	0.138067	0.285485	0.483623	0.628653	0.999879	SLC25A13
ENSG00000004866	50.8204	-0.0996923	0.33365	-0.298793	0.765098	0.999879	ST7
ENSG00000004897	77.2701	0.238669	0.304123	0.784779	0.432583	0.999879	CDC27
ENSG00000004961	100.982	0.0657298	0.260484	0.252337	0.80078	0.999879	HCCS
ENSG00000004975	58.0689	-0.0486806	0.319736	-0.152253	0.878988	0.999879	DVL2
ENSG00000005007	48.2982	-0.219422	0.376561	-0.582698	0.560096	0.999879	UPF1
ENSG00000005020	8.90704	-0.936454	0.679191	-1.37878	0.167963	0.999879	SKAP2
ENSG00000005022	1034.4	0.0391856	0.193219	0.202804	0.839288	0.999879	SLC25A5
ENSG00000005059	31.7536	-0.0291052	0.414159	-0.0702754	0.943974	0.999879	MCUB
ENSG00000005073	23.4006	0.172051	0.509857	0.33745	0.735778	0.999879	HOXA11
ENSG00000005075	244.655	0.089084	0.232817	0.382636	0.70199	0.999879	POLR2J
ENSG00000005100	29.65	-0.394987	0.392245	-1.00699	0.313939	0.999879	DHX33
ENSG00000005156	24.6584	-0.467459	0.431301	-1.08383	0.278438	0.999879	LIG3
ENSG00000005175	44.5733	0.0819945	0.341847	0.239857	0.810441	0.999879	RPAP3
ENSG00000005189	7.69539	0.627419	0.733045	0.855907	0.392049	0.999879	REXO5
ENSG00000005194	91.4507	-0.301478	0.288355	-1.04551	0.295788	0.999879	CIAPIN1
ENSG00000005206	19.1595	-0.233675	0.485678	-0.481131	0.630423	0.999879	SPPL2B
ENSG00000005238	10.7515	0.276396	0.63024	0.438556	0.660983	0.999879	FAM214B
ENSG00000005243	11.359	0.0780846	0.664298	0.117545	0.906429	0.999879	COPZ2
ENSG00000005302	50.6526	-0.0408399	0.324896	-0.125701	0.899968	0.999879	MSL3
ENSG00000005339	29.1769	-0.727216	0.457175	-1.59067	0.111683	0.999879	CREBBP
ENSG00000005436	25.5045	0.316739	0.457804	0.691865	0.489022	0.999879	GCFC2
ENSG00000005448	57.464	-0.0522783	0.308191	-0.16963	0.865301	0.999879	WDR54
ENSG00000005469	11.6501	0.118527	0.59802	0.1982	0.842889	0.999879	CROT
ENSG00000005483	20.7518	-0.0103923	0.540116	-0.0192408	0.984649	0.999879	KMT2E
ENSG00000005486	66.7642	0.172723	0.295373	0.58476	0.558709	0.999879	RHBDD2
ENSG00000005700	26.9081	0.371505	0.4465	0.832037	0.405388	0.999879	IBTK
ENSG00000005801	18.6128	0.32519	0.506526	0.642	0.520873	0.999879	ZNF195
ENSG00000005810	33.2549	-0.899626	0.455135	-1.97661	0.0480854	0.999879	MYCBP2
ENSG00000005812	64.3995	0.113236	0.311493	0.363527	0.716211	0.999879	FBXL3
ENSG00000005882	33.4164	-0.234829	0.382413	-0.614072	0.539168	0.999879	PDK2
ENSG00000005884	118.401	0.12866	0.355147	0.362272	0.717149	0.999879	ITGA3
ENSG00000005889	54.0915	0.0194814	0.435403	0.0447434	0.964312	0.999879	ZFX
ENSG00000005893	141.426	-0.024202	0.257811	-0.0938748	0.925209	0.999879	LAMP2
ENSG00000006007	109.591	0.17405	0.261095	0.666616	0.505017	0.999879	GDE1
ENSG00000006015	56.1475	0.0633578	0.314304	0.201582	0.840244	0.999879	REX1BD
ENSG00000006016	222.533	0.126081	0.253846	0.496683	0.619413	0.999879	CRLF1
ENSG00000006025	7.39815	0.313153	0.705841	0.44366	0.657289	0.999879	OSBPL7
ENSG00000006062	23.2416	-0.666805	0.462576	-1.4415	0.149443	0.999879	MAP3K14
ENSG00000006118	76.5685	0.34287	0.31167	1.10011	0.271286	0.999879	TMEM132A
ENSG00000006125	207.419	-0.0469452	0.249532	-0.188133	0.850772	0.999879	AP2B1
ENSG00000006194	26.3202	-0.0904567	0.464919	-0.194565	0.845734	0.999879	ZNF263
ENSG00000006282	32.5849	0.173734	0.409218	0.42455	0.671165	0.999879	SPATA20
ENSG00000006327	308.44	-0.200334	0.668364	-0.299738	0.764377	0.999879	TNFRSF12A
ENSG00000006451	90.6686	-0.0377398	0.296608	-0.127238	0.898752	0.999879	RALA
ENSG00000006453	28.518	0.290704	0.407148	0.714002	0.475226	0.999879	BAIAP2L1
ENSG00000006530	20.6693	-0.316065	0.476718	-0.663002	0.507329	0.999879	AGK
ENSG00000006534	86.9445	-0.163498	0.293712	-0.556662	0.577758	0.999879	ALDH3B1
ENSG00000006576	27.0987	0.161106	0.418671	0.384803	0.700383	0.999879	PHTF2
ENSG00000006611	10.9041	-0.222407	0.638022	-0.348587	0.727399	0.999879	USH1C
ENSG00000006625	140.635	0.183298	0.249316	0.735205	0.462214	0.999879	GGCT
ENSG00000006634	45.8528	0.47351	0.380912	1.2431	0.213832	0.999879	DBF4
ENSG00000006638	22.8531	0.0608354	0.463672	0.131203	0.895614	0.999879	TBXA2R
ENSG00000006652	111.17	0.337714	0.256535	1.31645	0.188024	0.999879	IFRD1
ENSG00000006695	35.3378	-0.0894557	0.407874	-0.219322	0.826399	0.999879	COX10
ENSG00000006704	60.1377	0.0439335	0.306568	0.143308	0.886047	0.999879	GTF2IRD1
ENSG00000006712	33.7724	0.267067	0.417809	0.639208	0.522688	0.999879	PAF1
ENSG00000006715	19.5459	0.333196	0.488856	0.681584	0.495502	0.999879	VPS41
ENSG00000006740	10.4513	-0.0207667	0.643881	-0.0322524	0.974271	0.999879	ARHGAP44
ENSG00000006744	123.808	-0.0714919	0.275084	-0.259891	0.794948	0.999879	ELAC2
ENSG00000006757	44.5068	0.612376	0.355148	1.72428	0.0846571	0.999879	PNPLA4
ENSG00000006831	62.498	-0.177369	0.301894	-0.587521	0.556854	0.999879	ADIPOR2
ENSG00000007038	282.051	0.139711	0.2181	0.640583	0.521793	0.999879	PRSS21
ENSG00000007047	17.1022	-0.892275	0.538662	-1.65647	0.0976276	0.999879	MARK4
ENSG00000007080	170.457	0.1129	0.283267	0.398563	0.690215	0.999879	CCDC124
ENSG00000007168	124.735	-0.129166	0.254914	-0.506706	0.612361	0.999879	PAFAH1B1
ENSG00000007202	102.446	-0.292562	0.261076	-1.1206	0.262458	0.999879	KIAA0100
ENSG00000007341	30.3632	0.159856	0.396032	0.403645	0.686474	0.999879	ST7L
ENSG00000007372	18.0941	-0.121787	0.495909	-0.245584	0.806004	0.999879	PAX6
ENSG00000007376	87.7	-0.0196837	0.276039	-0.0713076	0.943153	0.999879	RPUSD1
ENSG00000007392	40.8569	0.327625	0.345413	0.948501	0.342875	0.999879	LUC7L
ENSG00000007520	177.798	-0.225267	0.242724	-0.928078	0.353367	0.999879	TSR3
ENSG00000007541	44.6331	0.260624	0.337879	0.771354	0.440497	0.999879	PIGQ
ENSG00000007545	7.88276	-0.389162	0.783108	-0.496946	0.619227	0.999879	CRAMP1
ENSG00000007866	9.86407	-0.0294956	0.634138	-0.0465129	0.962901	0.999879	TEAD3
ENSG00000007923	64.3772	-0.187789	0.298836	-0.628401	0.529742	0.999879	DNAJC11
ENSG00000007944	8.50896	0.083529	0.753477	0.110858	0.911729	0.999879	MYLIP
ENSG00000007968	11.2775	0.539771	0.628469	0.858867	0.390414	0.999879	E2F2
ENSG00000008018	401.069	0.168239	0.228726	0.735549	0.462005	0.999879	PSMB1
ENSG00000008083	10.6201	-0.797686	0.634821	-1.25655	0.208916	0.999879	JARID2
ENSG00000008086	7.75667	-0.0946922	0.752324	-0.125866	0.899838	0.999879	CDKL5
ENSG00000008128	16.3882	0.137867	0.507726	0.271539	0.785977	0.999879	CDK11A
ENSG00000008130	77.2099	-0.120949	0.302989	-0.399186	0.689756	0.999879	NADK
ENSG00000008256	27.9806	-0.894652	0.420207	-2.12907	0.0332481	0.999879	CYTH3
ENSG00000008282	104.449	-0.0345763	0.260258	-0.132854	0.894309	0.999879	SYPL1
ENSG00000008283	31.7251	-0.274531	0.390965	-0.702187	0.482562	0.999879	CYB561
ENSG00000008294	36.9642	-0.0497079	0.381611	-0.130258	0.896362	0.999879	SPAG9
ENSG00000008300	13.9513	-0.692352	0.559288	-1.23792	0.215747	0.999879	CELSR3
ENSG00000008324	75.5038	0.089611	0.327588	0.273548	0.784432	0.999879	SS18L2
ENSG00000008382	30.2047	-0.019089	0.389066	-0.0490636	0.960869	0.999879	MPND
ENSG00000008394	482.325	0.0936323	0.22773	0.411155	0.680959	0.999879	MGST1
ENSG00000008405	18.6052	-0.558056	0.505851	-1.1032	0.26994	0.999879	CRY1
ENSG00000008441	31.7301	-0.250004	0.548084	-0.456141	0.648289	0.999879	NFIX
ENSG00000008513	18.2395	-0.515153	0.544447	-0.946195	0.344049	0.999879	ST3GAL1
ENSG00000008517	161.774	-0.181173	0.321846	-0.562917	0.573491	0.999879	IL32
ENSG00000008710	14.9725	-0.229985	0.557839	-0.412279	0.680135	0.999879	PKD1
ENSG00000008838	63.7479	0.134491	0.31091	0.432573	0.665325	0.999879	MED24
ENSG00000008853	19.6565	-0.730751	0.469298	-1.55711	0.119443	0.999879	RHOBTB2
ENSG00000008869	8.48932	0.895533	0.698269	1.2825	0.199666	0.999879	HEATR5B
ENSG00000008952	79.6424	-0.129704	0.295512	-0.438911	0.660726	0.999879	SEC62
ENSG00000008988	2762.63	0.266662	0.205193	1.29957	0.19375	0.999879	RPS20
ENSG00000009307	460.945	0.0112169	0.205868	0.0544862	0.956548	0.999879	CSDE1
ENSG00000009335	49.7811	-0.519479	0.345231	-1.50473	0.132393	0.999879	UBE3C
ENSG00000009413	9.88389	-0.0263548	0.64736	-0.0407112	0.967526	0.999879	REV3L
ENSG00000009780	7.06961	0.539859	0.753723	0.716257	0.473832	0.999879	FAM76A
ENSG00000009830	21.4156	-0.108193	0.454248	-0.238181	0.811741	0.999879	POMT2
ENSG00000009844	75.7676	0.311403	0.331316	0.939898	0.34727	0.999879	VTA1
ENSG00000009954	58.3887	-0.372457	0.357042	-1.04317	0.296868	0.999879	BAZ1B
ENSG00000010017	41.7948	-0.162793	0.378158	-0.430489	0.66684	0.999879	RANBP9
ENSG00000010072	22.316	0.0422861	0.439915	0.0961235	0.923423	0.999879	SPRTN
ENSG00000010165	50.7836	-0.141978	0.322192	-0.440663	0.659457	0.999879	METTL13
ENSG00000010219	26.0904	-0.0884251	0.434682	-0.203425	0.838803	0.999879	DYRK4
ENSG00000010244	206.432	-0.101679	0.255425	-0.398079	0.690572	0.999879	ZNF207
ENSG00000010256	558.565	0.0352935	0.209289	0.168636	0.866083	0.999879	UQCRC1
ENSG00000010270	61.288	-0.0555479	0.327243	-0.169745	0.865211	0.999879	STARD3NL
ENSG00000010278	120.232	0.192653	0.255341	0.754495	0.450552	0.999879	CD9
ENSG00000010292	139.388	-0.131972	0.243227	-0.542589	0.587413	0.999879	NCAPD2
ENSG00000010322	22.948	0.427024	0.459597	0.929127	0.352823	0.999879	NISCH
ENSG00000010361	27.6815	-0.0471214	0.418395	-0.112624	0.910329	0.999879	FUZ
ENSG00000010404	56.9317	0.282896	0.371549	0.761395	0.446421	0.999879	IDS
ENSG00000010539	15.8614	0.390518	0.517977	0.753929	0.450892	0.999879	ZNF200
ENSG00000010626	9.32266	-0.151997	0.64229	-0.236649	0.812929	0.999879	LRRC23
ENSG00000010803	23.3045	0.0180561	0.477616	0.0378047	0.969843	0.999879	SCMH1
ENSG00000010810	14.2701	-0.215012	0.545422	-0.394212	0.693425	0.999879	FYN
ENSG00000010818	7.65932	-0.645053	0.697686	-0.92456	0.355195	0.999879	HIVEP2
ENSG00000011007	64.8172	-0.0846402	0.299884	-0.282243	0.777757	0.999879	ELOA
ENSG00000011009	118.595	0.149374	0.26348	0.566928	0.570763	0.999879	LYPLA2
ENSG00000011028	69.2923	0.322607	0.299744	1.07627	0.281804	0.999879	MRC2
ENSG00000011052	125.163	0.455645	0.293487	1.55252	0.120538	0.999879	NME1-NME2
ENSG00000011105	10.5392	-0.515648	0.615044	-0.838392	0.40181	0.999879	TSPAN9
ENSG00000011114	11.949	-0.0995015	0.699058	-0.142337	0.886814	0.999879	BTBD7
ENSG00000011132	16.3117	-0.236858	0.507363	-0.466842	0.640613	0.999879	APBA3
ENSG00000011143	14.0392	-0.100733	0.53369	-0.188748	0.850291	0.999879	MKS1
ENSG00000011198	70.8523	0.0237798	0.314573	0.0755941	0.939742	0.999879	ABHD5
ENSG00000011201	26.6023	-0.219681	0.558709	-0.393193	0.694177	0.999879	ANOS1
ENSG00000011243	47.4022	0.292011	0.341918	0.854039	0.393083	0.999879	AKAP8L
ENSG00000011258	8.81918	0.379612	0.705424	0.538132	0.590486	0.999879	MBTD1
ENSG00000011260	107.212	-0.00648084	0.299705	-0.021624	0.982748	0.999879	UTP18
ENSG00000011275	25.7406	-0.182248	0.418256	-0.435733	0.66303	0.999879	RNF216
ENSG00000011295	44.5354	0.148518	0.348368	0.426325	0.669871	0.999879	TTC19
ENSG00000011304	491.304	-0.0342701	0.197982	-0.173097	0.862575	0.999879	PTBP1
ENSG00000011376	32.5624	-0.471391	0.378877	-1.24418	0.213433	0.999879	LARS2
ENSG00000011405	26.8999	-0.311087	0.429694	-0.723974	0.469082	0.999879	PIK3C2A
ENSG00000011422	89.8852	-0.0830264	0.299277	-0.277423	0.781455	0.999879	PLAUR
ENSG00000011426	110.866	-0.0911744	0.266119	-0.342608	0.731893	0.999879	ANLN
ENSG00000011451	43.6572	-0.192837	0.376725	-0.511877	0.608737	0.999879	WIZ
ENSG00000011454	33.7377	-0.549672	0.417304	-1.3172	0.187772	0.999879	RABGAP1
ENSG00000011478	28.2959	-0.00875819	0.412346	-0.0212399	0.983054	0.999879	QPCTL
ENSG00000011485	95.937	-0.094219	0.268345	-0.351111	0.725505	0.999879	PPP5C
ENSG00000011566	11.6567	0.305217	0.637398	0.478848	0.632047	0.999879	MAP4K3
ENSG00000011638	8.51796	0.308795	0.689385	0.447929	0.654205	0.999879	TMEM159
ENSG00000012048	27.4804	-0.299326	0.428999	-0.697731	0.485345	0.999879	BRCA1
ENSG00000012061	116.245	0.112449	0.258674	0.434711	0.663772	0.999879	ERCC1
ENSG00000012171	48.6695	0.0961443	0.350609	0.274221	0.783915	0.999879	SEMA3B
ENSG00000012174	34.68	-0.0404418	0.377784	-0.10705	0.914749	0.999879	MBTPS2
ENSG00000012211	6.90415	0.155643	0.746677	0.208448	0.834879	0.999879	PRICKLE3
ENSG00000012232	14.6862	-0.465112	0.540262	-0.860901	0.389293	0.999879	EXTL3
ENSG00000012660	148.764	0.0440293	0.254831	0.172778	0.862826	0.999879	ELOVL5
ENSG00000012822	17.8285	-0.398658	0.495772	-0.804115	0.42133	0.999879	CALCOCO1
ENSG00000012963	38.6317	-0.0243192	0.353722	-0.0687523	0.945187	0.999879	UBR7
ENSG00000012983	37.2042	0.0205348	0.406091	0.0505669	0.959671	0.999879	MAP4K5
ENSG00000013275	182.326	0.0304797	0.246924	0.123437	0.901761	0.999879	PSMC4
ENSG00000013288	16.1696	1.00377	0.527464	1.903	0.0570402	0.999879	MAN2B2
ENSG00000013306	374.774	0.129014	0.218522	0.590394	0.554926	0.999879	SLC25A39
ENSG00000013364	77.704	0.173438	0.366668	0.47301	0.636206	0.999879	MVP
ENSG00000013374	39.627	0.356871	0.36118	0.988071	0.323118	0.999879	NUB1
ENSG00000013375	37.3505	0.327405	0.371924	0.880301	0.378696	0.999879	PGM3
ENSG00000013503	9.8562	-0.495003	0.639875	-0.773593	0.439171	0.999879	POLR3B
ENSG00000013523	7.54795	-0.899276	0.727404	-1.23628	0.216354	0.999879	ANGEL1
ENSG00000013561	29.5314	-0.480298	0.423729	-1.1335	0.257003	0.999879	RNF14
ENSG00000013563	27.2283	0.130013	0.437013	0.297504	0.766082	0.999879	DNASE1L1
ENSG00000013573	48.6477	-0.396311	0.358105	-1.10669	0.268428	0.999879	DDX11
ENSG00000013583	87.148	0.195728	0.290442	0.673896	0.500377	0.999879	HEBP1
ENSG00000013588	133.972	-0.593372	0.729343	-0.813571	0.41589	0.999879	GPRC5A
ENSG00000013619	7.44031	-0.839559	0.809675	-1.03691	0.299778	0.999879	MAMLD1
ENSG00000013810	68.5734	-0.261952	0.304421	-0.860494	0.389517	0.999879	TACC3
ENSG00000014123	16.9294	-0.0718749	0.539427	-0.133243	0.894001	0.999879	UFL1
ENSG00000014138	64.2058	0.101314	0.31541	0.321214	0.748048	0.999879	POLA2
ENSG00000014164	28.4047	0.0170782	0.422871	0.0403862	0.967785	0.999879	ZC3H3
ENSG00000014216	142.499	-0.107589	0.242682	-0.443333	0.657525	0.999879	CAPN1
ENSG00000014641	256.529	-0.0595826	0.235357	-0.253158	0.800146	0.999879	MDH1
ENSG00000014824	53.1984	-0.00361842	0.331169	-0.0109262	0.991282	0.999879	SLC30A9
ENSG00000014919	35.6638	0.125435	0.377616	0.332175	0.739757	0.999879	COX15
ENSG00000015133	8.37574	-0.696735	0.730884	-0.953277	0.34045	0.999879	CCDC88C
ENSG00000015153	26.7726	0.0321368	0.419392	0.0766272	0.93892	0.999879	YAF2
ENSG00000015171	33.0941	0.284915	0.384981	0.740074	0.459255	0.999879	ZMYND11
ENSG00000015475	49.8155	-0.127399	0.324631	-0.392441	0.694733	0.999879	BID
ENSG00000015479	159.702	0.282856	0.254585	1.11105	0.266547	0.999879	MATR3
ENSG00000015532	12.1556	-0.520465	0.571975	-0.909943	0.362852	0.999879	XYLT2
ENSG00000015676	52.2668	-0.120392	0.319972	-0.376258	0.706725	0.999879	NUDCD3
ENSG00000016082	10.3205	0.0445118	0.613851	0.0725124	0.942194	0.999879	ISL1
ENSG00000016864	55.4739	0.0939281	0.323722	0.290151	0.771701	0.999879	GLT8D1
ENSG00000017260	67.4128	0.0779215	0.300638	0.259188	0.795491	0.999879	ATP2C1
ENSG00000017483	404.572	0.0641588	0.2141	0.299667	0.764431	0.999879	SLC38A5
ENSG00000017797	49.4434	-0.191472	0.327277	-0.585045	0.558517	0.999879	RALBP1
ENSG00000018408	40.0083	-0.532148	0.370472	-1.4364	0.150887	0.999879	WWTR1
ENSG00000018510	162.53	0.0769643	0.270775	0.284237	0.776229	0.999879	AGPS
ENSG00000018610	45.2532	-0.0925282	0.339121	-0.272847	0.78497	0.999879	CXorf56
ENSG00000018699	21.4228	0.128324	0.451824	0.284012	0.776401	0.999879	TTC27
ENSG00000019144	30.3707	-0.0836645	0.471827	-0.17732	0.859257	0.999879	PHLDB1
ENSG00000019485	7.33102	-0.184421	0.748345	-0.246438	0.805343	0.999879	PRDM11
ENSG00000019549	18.5238	-0.285199	0.475603	-0.599657	0.548735	0.999879	SNAI2
ENSG00000019995	19.6399	0.0462248	0.462718	0.0998984	0.920425	0.999879	ZRANB1
ENSG00000020129	31.6098	0.140451	0.377791	0.371768	0.710066	0.999879	NCDN
ENSG00000020181	12.2579	-0.669838	0.597252	-1.12153	0.262061	0.999879	ADGRA2
ENSG00000020256	46.0311	0.0452854	0.330913	0.13685	0.89115	0.999879	ZFP64
ENSG00000020426	43.6325	-0.292126	0.351229	-0.831726	0.405564	0.999879	MNAT1
ENSG00000020633	10.8693	-0.325481	0.592802	-0.549056	0.582967	0.999879	RUNX3
ENSG00000020922	38.9012	-0.312381	0.362719	-0.86122	0.389117	0.999879	MRE11
ENSG00000021355	46.7546	0.0992531	0.340631	0.29138	0.77076	0.999879	SERPINB1
ENSG00000021574	15.2043	-0.0832396	0.523134	-0.159117	0.873577	0.999879	SPAST
ENSG00000021762	24.9415	0.038237	0.44852	0.0852516	0.932061	0.999879	OSBPL5
ENSG00000021776	36.8065	-0.268553	0.36245	-0.740936	0.458732	0.999879	AQR
ENSG00000021826	355.157	-0.261569	0.309355	-0.845532	0.397814	0.999879	CPS1
ENSG00000022267	42.3453	-0.235002	0.343575	-0.683991	0.493981	0.999879	FHL1
ENSG00000022277	197.654	0.084685	0.246726	0.343235	0.731421	0.999879	RTFDC1
ENSG00000022840	85.8753	0.288246	0.301172	0.957081	0.338526	0.999879	RNF10
ENSG00000023041	53.7105	-0.104787	0.355478	-0.294777	0.768164	0.999879	ZDHHC6
ENSG00000023171	27.5015	-0.515578	0.452579	-1.1392	0.25462	0.999879	GRAMD1B
ENSG00000023191	128.393	0.110843	0.251371	0.440955	0.659245	0.999879	RNH1
ENSG00000023228	184.712	0.0250318	0.266498	0.0939287	0.925166	0.999879	NDUFS1
ENSG00000023287	43.8402	0.132654	0.361511	0.366942	0.713662	0.999879	RB1CC1
ENSG00000023318	83.703	0.26179	0.288057	0.908812	0.363449	0.999879	ERP44
ENSG00000023330	72.852	-0.0010559	0.29846	-0.00353782	0.997177	0.999879	ALAS1
ENSG00000023516	18.5145	-0.484191	0.51217	-0.945372	0.344469	0.999879	AKAP11
ENSG00000023572	73.6673	0.0753357	0.297081	0.253587	0.799815	0.999879	GLRX2
ENSG00000023608	16.6704	0.440972	0.540103	0.81646	0.414237	0.999879	SNAPC1
ENSG00000023697	68.1689	-0.0946337	0.332435	-0.284668	0.775898	0.999879	DERA
ENSG00000023734	404.577	0.00695741	0.23037	0.030201	0.975907	0.999879	STRAP
ENSG00000023902	16.3235	0.124289	0.535159	0.232247	0.816346	0.999879	PLEKHO1
ENSG00000023909	163.815	-0.138044	0.258539	-0.533939	0.593384	0.999879	GCLM
ENSG00000024048	17.2923	-0.291428	0.543058	-0.536644	0.591514	0.999879	UBR2
ENSG00000024422	172.642	-0.104219	0.376182	-0.277044	0.781746	0.999879	EHD2
ENSG00000024526	55.6129	0.0520959	0.326102	0.159754	0.873075	0.999879	DEPDC1
ENSG00000024862	16.5638	0.0884801	0.530601	0.166755	0.867563	0.999879	CCDC28A
ENSG00000025156	9.39806	0.0461965	0.668926	0.0690607	0.944941	0.999879	HSF2
ENSG00000025293	30.8183	-0.520923	0.405654	-1.28416	0.199087	0.999879	PHF20
ENSG00000025434	26.2454	0.301796	0.429882	0.702043	0.482652	0.999879	NR1H3
ENSG00000025708	52.8103	0.194024	0.323759	0.599285	0.548983	0.999879	TYMP
ENSG00000025770	107.273	-0.0588352	0.268115	-0.21944	0.826307	0.999879	NCAPH2
ENSG00000025772	102.758	0.0170846	0.27976	0.0610688	0.951304	0.999879	TOMM34
ENSG00000025796	64.6229	-0.047844	0.308632	-0.155019	0.876806	0.999879	SEC63
ENSG00000025800	54.6092	-0.44674	0.372073	-1.20068	0.229876	0.999879	KPNA6
ENSG00000026025	1430.91	0.0786609	0.209949	0.374667	0.707908	0.999879	VIM
ENSG00000026103	10.3405	-0.0393817	0.677412	-0.0581356	0.953641	0.999879	FAS
ENSG00000026297	36.858	0.336204	0.375554	0.895223	0.370668	0.999879	RNASET2
ENSG00000026508	301.416	0.139683	0.213292	0.654893	0.512537	0.999879	CD44
ENSG00000026559	51.5353	-0.165492	0.398695	-0.415085	0.67808	0.999879	KCNG1
ENSG00000026652	9.37389	0.429893	0.672882	0.638884	0.522898	0.999879	AGPAT4
ENSG00000027001	20.6781	-0.0875291	0.463523	-0.188835	0.850222	0.999879	MIPEP
ENSG00000027697	29.2573	-0.213887	0.40006	-0.534637	0.592901	0.999879	IFNGR1
ENSG00000027847	32.7074	-0.305258	0.397031	-0.768852	0.441981	0.999879	B4GALT7
ENSG00000027869	7.08921	0.150539	0.745697	0.201877	0.840013	0.999879	SH2D2A
ENSG00000028116	18.2947	0.202697	0.494563	0.409851	0.681915	0.999879	VRK2
ENSG00000028203	22.4454	0.354954	0.450404	0.78808	0.43065	0.999879	VEZT
ENSG00000028310	67.1212	-0.0375902	0.299583	-0.125475	0.900148	0.999879	BRD9
ENSG00000028528	81.8132	0.0783616	0.301603	0.259817	0.795005	0.999879	SNX1
ENSG00000028839	37.6204	0.308964	0.380302	0.812416	0.416553	0.999879	TBPL1
ENSG00000029153	11.9334	-0.391072	0.64079	-0.610297	0.541665	0.999879	ARNTL2
ENSG00000029363	126.837	0.014207	0.285601	0.0497441	0.960326	0.999879	BCLAF1
ENSG00000029364	39.5525	0.238674	0.356142	0.670165	0.502752	0.999879	SLC39A9
ENSG00000029639	16.8672	0.261237	0.523055	0.499444	0.617467	0.999879	TFB1M
ENSG00000029725	76.1401	0.136217	0.290285	0.469252	0.638889	0.999879	RABEP1
ENSG00000029993	100.834	-0.260702	0.278292	-0.936792	0.348866	0.999879	HMGB3
ENSG00000030066	162.781	-0.272282	0.236889	-1.14941	0.250388	0.999879	NUP160
ENSG00000030110	42.8584	0.106295	0.348459	0.305042	0.760334	0.999879	BAK1
ENSG00000030582	142.845	0.00114547	0.287922	0.0039784	0.996826	0.999879	GRN
ENSG00000031003	21.5192	-0.0548691	0.449971	-0.121939	0.902947	0.999879	FAM13B
ENSG00000031691	26.4456	0.0764823	0.406098	0.188334	0.850614	0.999879	CENPQ
ENSG00000031698	193.134	0.0349211	0.242638	0.143923	0.885561	0.999879	SARS
ENSG00000031823	46.9214	0.115875	0.327916	0.353368	0.723813	0.999879	RANBP3
ENSG00000032219	7.40182	0.977289	0.73131	1.33635	0.181434	0.999879	ARID4A
ENSG00000032389	48.6482	-0.239143	0.337176	-0.709252	0.478168	0.999879	EIPR1
ENSG00000032444	56.8043	0.168144	0.317829	0.52904	0.596778	0.999879	PNPLA6
ENSG00000033011	75.0048	-0.223762	0.315083	-0.710166	0.477601	0.999879	ALG1
ENSG00000033030	13.1571	0.877058	0.583404	1.50335	0.13275	0.999879	ZCCHC8
ENSG00000033050	112.139	-0.176071	0.267189	-0.658974	0.509912	0.999879	ABCF2
ENSG00000033100	35.7348	-0.764321	0.373808	-2.04469	0.0408854	0.999879	CHPF2
ENSG00000033170	11.5451	0.00910959	0.61202	0.0148845	0.988124	0.999879	FUT8
ENSG00000033178	24.2278	0.524366	0.53277	0.984225	0.325005	0.999879	UBA6
ENSG00000033327	8.13947	0.573877	0.814376	0.704684	0.481007	0.999879	GAB2
ENSG00000033627	25.0953	-0.135951	0.415156	-0.32747	0.743313	0.999879	ATP6V0A1
ENSG00000033800	23.4305	0.597345	0.464334	1.28646	0.198284	0.999879	PIAS1
ENSG00000033867	33.688	-0.332855	0.386496	-0.861213	0.389121	0.999879	SLC4A7
ENSG00000034152	48.2177	-0.309527	0.369266	-0.838221	0.401906	0.999879	MAP2K3
ENSG00000034510	4172.48	0.243534	0.312263	0.779901	0.435449	0.999879	TMSB10
ENSG00000034677	50.7273	-0.232837	0.330068	-0.705419	0.480549	0.999879	RNF19A
ENSG00000034693	21.4885	0.401464	0.462812	0.867445	0.385698	0.999879	PEX3
ENSG00000034713	137.864	-0.124797	0.24423	-0.510979	0.609366	0.999879	GABARAPL2
ENSG00000035141	94.6165	-0.0486391	0.278191	-0.17484	0.861205	0.999879	FAM136A
ENSG00000035403	149.72	-0.33	0.295217	-1.11782	0.263643	0.999879	VCL
ENSG00000035499	36.8194	-0.0719563	0.361725	-0.198925	0.842321	0.999879	DEPDC1B
ENSG00000035681	28.1233	-0.167102	0.406329	-0.411248	0.680891	0.999879	NSMAF
ENSG00000035687	90.3152	-0.0979573	0.272467	-0.35952	0.719206	0.999879	ADSS
ENSG00000035862	333.015	-0.210829	0.281434	-0.749123	0.453783	0.999879	TIMP2
ENSG00000035928	52.7469	0.0626157	0.34356	0.182256	0.855382	0.999879	RFC1
ENSG00000036054	23.0743	0.116484	0.437107	0.266488	0.789863	0.999879	TBC1D23
ENSG00000036257	80.2317	-0.126904	0.315177	-0.402645	0.687209	0.999879	CUL3
ENSG00000036549	37.985	0.401731	0.380846	1.05484	0.291499	0.999879	ZZZ3
ENSG00000037042	13.5217	0.228736	0.550452	0.415543	0.677745	0.999879	TUBG2
ENSG00000037241	182.796	0.117688	0.25401	0.463319	0.643136	0.999879	RPL26L1
ENSG00000037474	247.265	-0.355518	0.219315	-1.62104	0.10501	0.999879	NSUN2
ENSG00000037637	20.8421	-0.687888	0.465094	-1.47903	0.139132	0.999879	FBXO42
ENSG00000037749	13.75	-0.229943	0.537897	-0.427486	0.669026	0.999879	MFAP3
ENSG00000037757	45.3122	0.183525	0.350387	0.523779	0.600432	0.999879	MRI1
ENSG00000037897	26.1997	0.306431	0.434712	0.704905	0.480869	0.999879	METTL1
ENSG00000038002	11.2544	-0.098384	0.603273	-0.163084	0.870452	0.999879	AGA
ENSG00000038210	22.1506	-0.152267	0.481583	-0.316181	0.751865	0.999879	PI4K2B
ENSG00000038219	24.2654	-0.420197	0.523539	-0.802609	0.422201	0.999879	BOD1L1
ENSG00000038274	114.396	-0.275103	0.26653	-1.03216	0.301995	0.999879	MAT2B
ENSG00000038295	21.287	0.087044	0.454781	0.191398	0.848214	0.999879	TLL1
ENSG00000038358	34.6302	0.0760599	0.37846	0.200972	0.84072	0.999879	EDC4
ENSG00000038382	99.143	-0.552042	0.307629	-1.79451	0.0727324	0.999879	TRIO
ENSG00000038532	16.0482	-0.29582	0.537368	-0.550499	0.581977	0.999879	CLEC16A
ENSG00000039123	107.126	0.147214	0.292568	0.50318	0.614838	0.999879	SKIV2L2
ENSG00000039319	30.3225	0.213454	0.427129	0.499741	0.617257	0.999879	ZFYVE16
ENSG00000039523	28.6744	-0.066421	0.465568	-0.142667	0.886554	0.999879	RIPOR1
ENSG00000039560	106.993	-0.146299	0.268034	-0.545822	0.585188	0.999879	RAI14
ENSG00000039650	34.7208	0.0951849	0.373921	0.254559	0.799064	0.999879	PNKP
ENSG00000040275	98.3627	0.0508998	0.318496	0.159813	0.873029	0.999879	SPDL1
ENSG00000040341	28.0129	-0.376114	0.412536	-0.911713	0.36192	0.999879	STAU2
ENSG00000040487	13.0377	0.871319	0.568301	1.5332	0.125227	0.999879	PQLC2
ENSG00000040531	19.6703	-0.13049	0.475696	-0.274314	0.783844	0.999879	CTNS
ENSG00000040608	8.19521	-0.744699	0.714782	-1.04186	0.297479	0.999879	RTN4R
ENSG00000040633	75.6167	0.181472	0.286231	0.634005	0.526078	0.999879	PHF23
ENSG00000040933	11.1167	-0.310269	0.626332	-0.495374	0.620336	0.999879	INPP4A
ENSG00000041353	8.76112	-0.195284	0.679052	-0.287583	0.773666	0.999879	RAB27B
ENSG00000041357	341.658	0.103736	0.29	0.35771	0.72056	0.999879	PSMA4
ENSG00000041802	33.9417	-0.285467	0.383957	-0.743487	0.457187	0.999879	LSG1
ENSG00000041880	11.9779	-0.361912	0.590082	-0.613325	0.539661	0.999879	PARP3
ENSG00000041982	11.4974	0.083386	0.64273	0.129737	0.896774	0.999879	TNC
ENSG00000041988	32.758	0.128904	0.410318	0.314157	0.753402	0.999879	THAP3
ENSG00000042088	21.9175	0.402433	0.465632	0.864273	0.387438	0.999879	TDP1
ENSG00000042286	57.3102	-0.103051	0.308208	-0.334356	0.738111	0.999879	AIFM2
ENSG00000042429	56.5565	-0.0938659	0.326416	-0.287565	0.77368	0.999879	MED17
ENSG00000042445	29.4688	0.261069	0.414346	0.630075	0.528645	0.999879	RETSAT
ENSG00000042493	127.624	0.255723	0.273979	0.933368	0.35063	0.999879	CAPG
ENSG00000042753	400.136	0.177966	0.264985	0.671606	0.501835	0.999879	AP2S1
ENSG00000043093	40.0906	-0.242647	0.351727	-0.689873	0.490274	0.999879	DCUN1D1
ENSG00000043143	43.9238	-0.112498	0.357204	-0.31494	0.752808	0.999879	JADE2
ENSG00000043355	11.093	-0.126374	0.625963	-0.201888	0.840004	0.999879	ZIC2
ENSG00000043514	33.3382	0.00916582	0.408069	0.0224614	0.98208	0.999879	TRIT1
ENSG00000044090	11.2476	0.401625	0.622089	0.645607	0.518534	0.999879	CUL7
ENSG00000044115	370.977	-0.175153	0.207117	-0.845672	0.397736	0.999879	CTNNA1
ENSG00000044446	15.9622	-0.223506	0.515811	-0.433309	0.66479	0.999879	PHKA2
ENSG00000044459	16.6581	0.0604422	0.498806	0.121174	0.903553	0.999879	CNTLN
ENSG00000044574	793.757	-0.00369148	0.194957	-0.0189349	0.984893	0.999879	HSPA5
ENSG00000046604	62.3794	-0.29606	0.303063	-0.976892	0.328623	0.999879	DSG2
ENSG00000046647	14.446	-0.158839	0.544037	-0.291963	0.770315	0.999879	GEMIN8
ENSG00000046651	14.9505	0.118827	0.554714	0.214212	0.830382	0.999879	OFD1
ENSG00000047056	7.89516	0.0270806	0.693739	0.0390357	0.968862	0.999879	WDR37
ENSG00000047188	27.2886	-0.227927	0.435195	-0.523734	0.600464	0.999879	YTHDC2
ENSG00000047230	26.0334	0.039449	0.43815	0.0900354	0.928259	0.999879	CTPS2
ENSG00000047249	57.2826	-0.227042	0.312636	-0.726218	0.467705	0.999879	ATP6V1H
ENSG00000047315	80.2481	-0.0696804	0.321597	-0.21667	0.828466	0.999879	POLR2B
ENSG00000047346	10.0444	-0.125549	0.628485	-0.199764	0.841665	0.999879	FAM214A
ENSG00000047365	7.60902	-0.432454	0.719315	-0.601203	0.547705	0.999879	ARAP2
ENSG00000047410	73.846	-0.183684	0.296704	-0.619081	0.535863	0.999879	TPR
ENSG00000047578	8.64894	-0.742863	0.710129	-1.0461	0.295516	0.999879	KIAA0556
ENSG00000047579	13.9414	-0.0334289	0.53847	-0.0620813	0.950498	0.999879	DTNBP1
ENSG00000047621	16.0689	0.048966	0.513731	0.0953144	0.924065	0.999879	C12orf4
ENSG00000047634	16.2497	-0.279082	0.516878	-0.539937	0.58924	0.999879	SCML1
ENSG00000047644	8.21495	0.34545	0.683444	0.505455	0.613239	0.999879	WWC3
ENSG00000047849	142.928	-0.502972	0.334961	-1.50158	0.133205	0.999879	MAP4
ENSG00000047932	55.3758	-0.23944	0.331932	-0.721352	0.470693	0.999879	GOPC
ENSG00000048028	12.812	0.256347	0.570856	0.449057	0.65339	0.999879	USP28
ENSG00000048140	32.8124	0.0589065	0.400123	0.147221	0.882958	0.999879	TSPAN17
ENSG00000048162	165.986	-0.0103246	0.251503	-0.0410515	0.967255	0.999879	NOP16
ENSG00000048342	22.6271	-0.0449492	0.451408	-0.0995755	0.920681	0.999879	CC2D2A
ENSG00000048392	18.1963	0.106394	0.49544	0.214746	0.829965	0.999879	RRM2B
ENSG00000048405	10.439	0.111624	0.606416	0.184072	0.853957	0.999879	ZNF800
ENSG00000048544	82.2361	0.133428	0.315652	0.422705	0.67251	0.999879	MRPS10
ENSG00000048649	25.3799	-0.039598	0.457951	-0.0864677	0.931095	0.999879	RSF1
ENSG00000048707	9.75582	-0.598635	0.674122	-0.888021	0.374529	0.999879	VPS13D
ENSG00000048828	126.426	-0.550114	0.27759	-1.98175	0.0475074	0.999879	FAM120A
ENSG00000048991	33.3347	-0.197935	0.389376	-0.50834	0.611215	0.999879	R3HDM1
ENSG00000049167	20.1245	-0.232853	0.471437	-0.493922	0.621362	0.999879	ERCC8
ENSG00000049245	89.8217	0.0155243	0.293547	0.0528852	0.957823	0.999879	VAMP3
ENSG00000049246	11.7148	-0.278186	0.601663	-0.462361	0.643822	0.999879	PER3
ENSG00000049323	17.7049	-0.544092	0.493811	-1.10182	0.270539	0.999879	LTBP1
ENSG00000049449	241.728	-0.0419583	0.217953	-0.192511	0.847342	0.999879	RCN1
ENSG00000049541	168.822	0.00459034	0.270134	0.0169928	0.986442	0.999879	RFC2
ENSG00000049618	31.4496	-0.481634	0.459405	-1.04839	0.29446	0.999879	ARID1B
ENSG00000049656	741.566	-0.0897683	0.219121	-0.409675	0.682045	0.999879	CLPTM1L
ENSG00000049759	22.1115	-0.0377056	0.445329	-0.0846692	0.932524	0.999879	NEDD4L
ENSG00000049860	142.369	0.0750062	0.249527	0.300594	0.763724	0.999879	HEXB
ENSG00000049883	25.4814	0.189623	0.443684	0.427382	0.669101	0.999879	PTCD2
ENSG00000050130	55.0879	-0.0794896	0.332589	-0.239002	0.811104	0.999879	JKAMP
ENSG00000050165	10.3636	0.0662889	0.673501	0.0984244	0.921595	0.999879	DKK3
ENSG00000050393	101.945	-0.0665779	0.320946	-0.207442	0.835664	0.999879	MCUR1
ENSG00000050405	53.954	-0.274999	0.390131	-0.704888	0.48088	0.999879	LIMA1
ENSG00000050426	32.7734	0.45484	0.429491	1.05902	0.28959	0.999879	LETMD1
ENSG00000050555	20.072	0.0626922	0.503238	0.124578	0.900858	0.999879	LAMC3
ENSG00000050748	49.8066	-0.102104	0.325166	-0.314004	0.753518	0.999879	MAPK9
ENSG00000050820	54.2494	-0.344545	0.388166	-0.887623	0.374744	0.999879	BCAR1
ENSG00000051009	17.7528	0.354148	0.479501	0.738575	0.460165	0.999879	FAM160A2
ENSG00000051108	89.3659	0.240453	0.278308	0.863984	0.387597	0.999879	HERPUD1
ENSG00000051128	27.1516	0.305873	0.412932	0.740735	0.458854	0.999879	HOMER3
ENSG00000051180	30.0744	-0.297369	0.41015	-0.725025	0.468437	0.999879	RAD51
ENSG00000051341	9.01338	-0.0485463	0.659102	-0.0736552	0.941285	0.999879	POLQ
ENSG00000051382	14.2296	0.169171	0.542125	0.312052	0.755001	0.999879	PIK3CB
ENSG00000051523	318.168	0.232408	0.32345	0.718528	0.472432	0.999879	CYBA
ENSG00000051596	135.038	0.0360936	0.265363	0.136016	0.891809	0.999879	THOC3
ENSG00000051620	58.0176	0.134135	0.317943	0.421883	0.67311	0.999879	HEBP2
ENSG00000051825	9.13419	0.513034	0.689835	0.743704	0.457055	0.999879	MPHOSPH9
ENSG00000052126	32.1184	0.173049	0.462647	0.374041	0.708374	0.999879	PLEKHA5
ENSG00000052723	42.1877	0.351456	0.350778	1.00193	0.316376	0.999879	SIKE1
ENSG00000052749	45.8848	0.0280258	0.343656	0.0815519	0.935003	0.999879	RRP12
ENSG00000052802	48.4862	0.0937515	0.349915	0.267926	0.788756	0.999879	MSMO1
ENSG00000052841	30.7219	-0.222667	0.434348	-0.512648	0.608198	0.999879	TTC17
ENSG00000053108	89.8615	-0.0899112	0.3024	-0.297326	0.766218	0.999879	FSTL4
ENSG00000053254	19.0199	-0.336703	0.531067	-0.634013	0.526072	0.999879	FOXN3
ENSG00000053371	123.465	0.128702	0.26124	0.492659	0.622254	0.999879	AKR7A2
ENSG00000053372	138.442	-0.191425	0.246785	-0.775676	0.43794	0.999879	MRTO4
ENSG00000053501	64.3899	0.311548	0.302738	1.0291	0.303433	0.999879	USE1
ENSG00000053770	28.5354	0.422201	0.406699	1.03812	0.299215	0.999879	AP5M1
ENSG00000053900	18.0266	0.367413	0.565457	0.649763	0.515845	0.999879	ANAPC4
ENSG00000054116	124.248	0.129865	0.246936	0.525907	0.598953	0.999879	TRAPPC3
ENSG00000054118	94.1421	-0.23893	0.315997	-0.756114	0.449581	0.999879	THRAP3
ENSG00000054148	403.174	0.216262	0.291173	0.742728	0.457647	0.999879	PHPT1
ENSG00000054267	19.4405	0.0477808	0.493503	0.0968197	0.92287	0.999879	ARID4B
ENSG00000054277	23.171	-0.156933	0.443462	-0.353882	0.723427	0.999879	OPN3
ENSG00000054282	8.87639	-0.689041	0.661951	-1.04092	0.297911	0.999879	SDCCAG8
ENSG00000054523	33.0117	-0.791139	0.398414	-1.98572	0.0470646	0.999879	KIF1B
ENSG00000054598	41.3278	-0.749026	0.390352	-1.91885	0.0550036	0.999879	FOXC1
ENSG00000054611	26.0112	0.184748	0.407417	0.453462	0.650216	0.999879	TBC1D22A
ENSG00000054654	7.3293	-0.528096	0.734649	-0.718841	0.472239	0.999879	SYNE2
ENSG00000054793	42.0806	-0.878724	0.474408	-1.85225	0.0639895	0.999879	ATP9A
ENSG00000054965	20.8419	-0.243598	0.485622	-0.50162	0.615934	0.999879	FAM168A
ENSG00000054967	9.24399	0.755755	0.727431	1.03894	0.298834	0.999879	RELT
ENSG00000055044	134.711	0.249758	0.289893	0.861551	0.388935	0.999879	NOP58
ENSG00000055070	210.966	-0.277797	0.261619	-1.06184	0.28831	0.999879	SZRD1
ENSG00000055130	56.3381	-0.2128	0.316493	-0.67237	0.501348	0.999879	CUL1
ENSG00000055147	15.7476	0.287247	0.547907	0.524263	0.600096	0.999879	FAM114A2
ENSG00000055163	34.2703	0.0614979	0.390521	0.157477	0.874869	0.999879	CYFIP2
ENSG00000055208	37.3905	-0.354047	0.376655	-0.939976	0.34723	0.999879	TAB2
ENSG00000055211	30.2533	-0.121978	0.398113	-0.30639	0.759308	0.999879	GINM1
ENSG00000055332	27.0199	-0.332724	0.51351	-0.647941	0.517023	0.999879	EIF2AK2
ENSG00000055483	25.7924	-0.371776	0.445384	-0.834733	0.403868	0.999879	USP36
ENSG00000055609	9.18262	-1.2442	0.696183	-1.78718	0.0739089	0.999879	KMT2C
ENSG00000055917	42.3662	-0.468378	0.361792	-1.29461	0.195455	0.999879	PUM2
ENSG00000055950	119.957	0.313583	0.255532	1.22718	0.219756	0.999879	MRPL43
ENSG00000056050	39.7023	-0.0479741	0.368323	-0.13025	0.896369	0.999879	HPF1
ENSG00000056097	114.882	0.142832	0.28536	0.500533	0.6167	0.999879	ZFR
ENSG00000056586	60.1329	-0.0406938	0.321445	-0.126596	0.89926	0.999879	RC3H2
ENSG00000056972	19.5202	0.287027	0.459558	0.62457	0.532253	0.999879	TRAF3IP2
ENSG00000057019	20.6518	-0.149213	0.454042	-0.328632	0.742434	0.999879	DCBLD2
ENSG00000057252	71.8035	-0.22249	0.868231	-0.256256	0.797753	0.999879	SOAT1
ENSG00000057608	356.403	-0.0009932	0.252994	-0.00392579	0.996868	0.999879	GDI2
ENSG00000057663	49.6899	0.210683	0.340118	0.619442	0.535625	0.999879	ATG5
ENSG00000057757	79.8564	0.116774	0.306948	0.380436	0.703622	0.999879	PITHD1
ENSG00000057935	33.9565	-0.30933	0.380681	-0.81257	0.416465	0.999879	MTA3
ENSG00000058056	26.5969	-0.298656	0.429074	-0.696048	0.486399	0.999879	USP13
ENSG00000058063	14.5442	0.0332903	0.581475	0.0572514	0.954345	0.999879	ATP11B
ENSG00000058091	19.821	0.176157	0.512191	0.343928	0.7309	0.999879	CDK14
ENSG00000058262	260.294	-0.0559206	0.238024	-0.234937	0.814258	0.999879	SEC61A1
ENSG00000058272	32.0815	0.0303738	0.420403	0.0722492	0.942404	0.999879	PPP1R12A
ENSG00000058453	16.7775	-0.0807156	0.549679	-0.146841	0.883257	0.999879	CROCC
ENSG00000058600	59.1643	-0.00265538	0.308108	-0.00861835	0.993124	0.999879	POLR3E
ENSG00000058668	30.6693	-0.444821	0.430413	-1.03347	0.301382	0.999879	ATP2B4
ENSG00000058673	34.127	-0.29133	0.435286	-0.669284	0.503315	0.999879	ZC3H11A
ENSG00000058729	35.2619	0.246155	0.390354	0.630595	0.528305	0.999879	RIOK2
ENSG00000058799	30.173	0.13449	0.428238	0.314054	0.75348	0.999879	YIPF1
ENSG00000058804	116.502	-0.0464054	0.258144	-0.179765	0.857337	0.999879	NDC1
ENSG00000059122	43.1608	0.00482764	0.362295	0.0133251	0.989368	0.999879	FLYWCH1
ENSG00000059145	23.2111	-0.299485	0.438464	-0.683032	0.494586	0.999879	UNKL
ENSG00000059378	13.4866	0.282866	0.561973	0.503345	0.614722	0.999879	PARP12
ENSG00000059573	90.8297	-0.293328	0.266811	-1.09939	0.2716	0.999879	ALDH18A1
ENSG00000059588	22.0697	-0.0929609	0.4756	-0.19546	0.845033	0.999879	TARBP1
ENSG00000059691	38.9041	-0.0233074	0.386305	-0.0603341	0.95189	0.999879	GATB
ENSG00000059758	15.6252	0.227667	0.512381	0.444332	0.656803	0.999879	CDK17
ENSG00000059769	17.4503	0.179064	0.509651	0.351347	0.725328	0.999879	DNAJC25
ENSG00000060069	25.6544	-0.464167	0.454626	-1.02099	0.307261	0.999879	CTDP1
ENSG00000060138	647.941	0.0381043	0.226698	0.168084	0.866517	0.999879	YBX3
ENSG00000060237	114.853	-0.690012	0.333986	-2.06599	0.0388295	0.999879	WNK1
ENSG00000060339	49.9398	0.0531734	0.341208	0.155839	0.87616	0.999879	CCAR1
ENSG00000060491	82.2939	0.0502258	0.32136	0.156292	0.875803	0.999879	OGFR
ENSG00000060642	13.1168	-0.329473	0.557474	-0.59101	0.554514	0.999879	PIGV
ENSG00000060656	9.49611	-0.651514	0.694991	-0.937442	0.348531	0.999879	PTPRU
ENSG00000060688	118.359	0.0376775	0.314711	0.119721	0.904704	0.999879	SNRNP40
ENSG00000060749	46.3661	-0.0785469	0.340258	-0.230845	0.817435	0.999879	QSER1
ENSG00000060762	63.3474	0.128551	0.325043	0.39549	0.692481	0.999879	MPC1
ENSG00000060971	54.8924	0.0284347	0.344708	0.0824892	0.934258	0.999879	ACAA1
ENSG00000060982	48.833	0.0556227	0.352158	0.157948	0.874498	0.999879	BCAT1
ENSG00000061273	41.6786	0.111206	0.39547	0.2812	0.778557	0.999879	HDAC7
ENSG00000061455	7.04645	-0.39898	0.800234	-0.49858	0.618076	0.999879	PRDM6
ENSG00000061676	114.715	-0.36659	0.30797	-1.19035	0.233911	0.999879	NCKAP1
ENSG00000061794	124.376	-0.0408421	0.274332	-0.148878	0.88165	0.999879	MRPS35
ENSG00000061936	23.131	0.159089	0.452797	0.351347	0.725328	0.999879	SFSWAP
ENSG00000061938	17.2728	0.413267	0.559283	0.738922	0.459954	0.999879	TNK2
ENSG00000061987	17.9981	0.019029	0.476388	0.0399443	0.968138	0.999879	MON2
ENSG00000062194	50.2932	-0.158799	0.331309	-0.479308	0.631719	0.999879	GPBP1
ENSG00000062282	9.56683	-0.263968	0.659269	-0.400395	0.688866	0.999879	DGAT2
ENSG00000062485	208.343	-0.181809	0.260733	-0.6973	0.485615	0.999879	CS
ENSG00000062582	386.732	0.0474461	0.208944	0.227075	0.820365	0.999879	MRPS24
ENSG00000062598	18.8764	-0.644219	0.489786	-1.31531	0.188407	0.999879	ELMO2
ENSG00000062650	32.6082	-0.0680562	0.399712	-0.170263	0.864803	0.999879	WAPL
ENSG00000062716	157.591	-0.18124	0.288519	-0.628174	0.52989	0.999879	VMP1
ENSG00000062725	30.2176	0.445199	0.391089	1.13836	0.25497	0.999879	APPBP2
ENSG00000062822	99.1732	0.152496	0.262456	0.581035	0.561217	0.999879	POLD1
ENSG00000063046	677.458	-0.0258044	0.21443	-0.12034	0.904214	0.999879	EIF4B
ENSG00000063176	17.6831	-0.187979	0.554811	-0.338816	0.734748	0.999879	SPHK2
ENSG00000063177	2448.74	0.174496	0.233863	0.746144	0.455581	0.999879	RPL18
ENSG00000063180	9.55728	0.128375	0.648899	0.197835	0.843174	0.999879	CA11
ENSG00000063241	69.4745	-0.0182555	0.290818	-0.0627729	0.949947	0.999879	ISOC2
ENSG00000063244	193.862	-0.0462948	0.270211	-0.171328	0.863966	0.999879	U2AF2
ENSG00000063245	188.082	-0.0187602	0.264735	-0.0708641	0.943506	0.999879	EPN1
ENSG00000063322	47.0168	0.1481	0.333187	0.444496	0.656684	0.999879	MED29
ENSG00000063438	20.1907	-0.201244	0.494547	-0.406926	0.684062	0.999879	AHRR
ENSG00000063601	25.3017	-0.566416	0.419153	-1.35133	0.176588	0.999879	MTMR1
ENSG00000063660	257.199	-0.0436639	0.218588	-0.199754	0.841673	0.999879	GPC1
ENSG00000063761	7.73351	0.414601	0.722055	0.574196	0.565835	0.999879	ADCK1
ENSG00000063854	45.6835	0.0272325	0.3414	0.0797671	0.936422	0.999879	HAGH
ENSG00000063978	72.1954	-0.255418	0.29817	-0.856618	0.391656	0.999879	RNF4
ENSG00000064012	17.7903	-0.482801	0.49897	-0.967595	0.333247	0.999879	CASP8
ENSG00000064042	154.396	-0.0669377	0.256913	-0.260546	0.794443	0.999879	LIMCH1
ENSG00000064102	89.8891	0.153417	0.292966	0.523671	0.600508	0.999879	INTS13
ENSG00000064115	131.624	-0.176511	0.28683	-0.615386	0.5383	0.999879	TM7SF3
ENSG00000064205	252.351	-0.0382086	0.673247	-0.0567527	0.954742	0.999879	WISP2
ENSG00000064309	9.12185	-1.27364	0.709566	-1.79495	0.0726616	0.999879	CDON
ENSG00000064313	24.9924	0.00019704	0.418704	0.000470596	0.999625	0.999879	TAF2
ENSG00000064393	13.829	-0.81323	0.568984	-1.42927	0.152927	0.999879	HIPK2
ENSG00000064419	62.2916	-0.271924	0.302857	-0.897864	0.369258	0.999879	TNPO3
ENSG00000064490	96.1965	-0.00959723	0.280067	-0.0342677	0.972664	0.999879	RFXANK
ENSG00000064545	61.4936	0.371821	0.312557	1.18961	0.234199	0.999879	TMEM161A
ENSG00000064601	156.549	0.269952	0.262429	1.02867	0.303636	0.999879	CTSA
ENSG00000064607	27.9901	0.0858571	0.441277	0.194565	0.845734	0.999879	SUGP2
ENSG00000064651	19.288	-0.609266	0.483017	-1.26137	0.207174	0.999879	SLC12A2
ENSG00000064652	17.6022	-0.403633	0.509962	-0.791497	0.428654	0.999879	SNX24
ENSG00000064666	248.575	-0.194011	0.374503	-0.518049	0.604424	0.999879	CNN2
ENSG00000064687	32.2621	0.202487	0.456233	0.443825	0.657169	0.999879	ABCA7
ENSG00000064703	26.1125	-0.221192	0.444684	-0.497415	0.618897	0.999879	DDX20
ENSG00000064726	83.3536	-0.0293745	0.304953	-0.0963248	0.923263	0.999879	BTBD1
ENSG00000064763	13.6173	-0.0698772	0.577775	-0.120942	0.903737	0.999879	FAR2
ENSG00000064932	58.8945	-0.00315234	0.30933	-0.0101908	0.991869	0.999879	SBNO2
ENSG00000064933	20.1048	0.141929	0.474062	0.299389	0.764643	0.999879	PMS1
ENSG00000064961	202.358	-0.112942	0.231182	-0.48854	0.625168	0.999879	HMG20B
ENSG00000064995	51.4563	0.277667	0.352146	0.7885	0.430404	0.999879	TAF11
ENSG00000064999	13.1317	-0.191748	0.557615	-0.343871	0.730943	0.999879	ANKS1A
ENSG00000065000	74.7961	-0.170275	0.305259	-0.557804	0.576978	0.999879	AP3D1
ENSG00000065029	15.4679	-0.220863	0.533275	-0.414164	0.678754	0.999879	ZNF76
ENSG00000065054	114.511	0.15136	0.292502	0.517467	0.60483	0.999879	SLC9A3R2
ENSG00000065057	97.5929	0.179315	0.264611	0.677655	0.49799	0.999879	NTHL1
ENSG00000065060	10.1912	-0.798798	0.657065	-1.21571	0.224097	0.999879	UHRF1BP1
ENSG00000065135	165.34	-0.0323848	0.250976	-0.129035	0.89733	0.999879	GNAI3
ENSG00000065150	366.074	0.0626987	0.223347	0.280724	0.778922	0.999879	IPO5
ENSG00000065154	55.5673	-0.212513	0.314535	-0.675643	0.499267	0.999879	OAT
ENSG00000065183	70.9271	-0.397449	0.299503	-1.32703	0.1845	0.999879	WDR3
ENSG00000065243	42.5014	-0.0625592	0.402076	-0.155591	0.876356	0.999879	PKN2
ENSG00000065268	120.993	0.00948313	0.254832	0.0372133	0.970315	0.999879	WDR18
ENSG00000065308	25.9271	-0.102306	0.436148	-0.234568	0.814544	0.999879	TRAM2
ENSG00000065325	91.7221	-0.135421	0.306693	-0.441552	0.658813	0.999879	GLP2R
ENSG00000065328	26.897	-0.14663	0.405785	-0.36135	0.717838	0.999879	MCM10
ENSG00000065357	12.8851	-0.0586546	0.556888	-0.105326	0.916117	0.999879	DGKA
ENSG00000065427	289.909	0.00427711	0.233646	0.0183059	0.985395	0.999879	KARS
ENSG00000065485	15.7738	0.153622	0.510832	0.300729	0.763621	0.999879	PDIA5
ENSG00000065491	13.7094	-0.280096	0.543137	-0.5157	0.606064	0.999879	TBC1D22B
ENSG00000065518	503.911	0.0351419	0.328229	0.107065	0.914737	0.999879	NDUFB4
ENSG00000065526	18.7498	-0.966806	0.634545	-1.52362	0.127604	0.999879	SPEN
ENSG00000065534	10.1692	-0.604148	0.724772	-0.833569	0.404524	0.999879	MYLK
ENSG00000065548	145.959	0.14879	0.278224	0.534783	0.5928	0.999879	ZC3H15
ENSG00000065559	30.1868	-0.134624	0.394036	-0.341655	0.732611	0.999879	MAP2K4
ENSG00000065600	16.6269	-0.257896	0.500507	-0.51527	0.606364	0.999879	TMEM206
ENSG00000065613	30.2497	0.0476866	0.40003	0.119207	0.905111	0.999879	SLK
ENSG00000065615	30.6558	-0.0999361	0.397237	-0.251578	0.801367	0.999879	CYB5R4
ENSG00000065621	14.5181	0.0237022	0.54066	0.0438394	0.965032	0.999879	GSTO2
ENSG00000065665	8.42033	0.563302	0.736884	0.764438	0.444606	0.999879	SEC61A2
ENSG00000065802	25.7397	-0.412829	0.438304	-0.94188	0.346254	0.999879	ASB1
ENSG00000065809	116.404	-0.0618291	0.269795	-0.229171	0.818736	0.999879	FAM107B
ENSG00000065833	100.356	-0.0811587	0.329245	-0.246499	0.805296	0.999879	ME1
ENSG00000065882	26.7925	-0.0397864	0.409859	-0.0970734	0.922668	0.999879	TBC1D1
ENSG00000065883	20.3278	0.454776	0.460609	0.987336	0.323478	0.999879	CDK13
ENSG00000065911	113.344	-0.169977	0.257767	-0.65942	0.509626	0.999879	MTHFD2
ENSG00000065970	12.829	-0.675794	0.586321	-1.1526	0.249074	0.999879	FOXJ2
ENSG00000065978	2978.02	0.024534	0.229424	0.106937	0.914839	0.999879	YBX1
ENSG00000065989	13.4889	0.0539101	0.588267	0.0916422	0.926982	0.999879	PDE4A
ENSG00000066027	38.6443	0.00459019	0.358225	0.0128137	0.989776	0.999879	PPP2R5A
ENSG00000066044	118.617	-0.173279	0.26849	-0.645382	0.51868	0.999879	ELAVL1
ENSG00000066084	20.7574	-0.932255	0.477901	-1.95073	0.0510895	0.999879	DIP2B
ENSG00000066117	66.3397	-0.191778	0.319091	-0.601015	0.54783	0.999879	SMARCD1
ENSG00000066135	36.9585	-0.472017	0.377554	-1.2502	0.211227	0.999879	KDM4A
ENSG00000066136	58.9923	0.327327	0.306841	1.06677	0.286077	0.999879	NFYC
ENSG00000066248	24.3132	0.231661	0.425625	0.544284	0.586246	0.999879	NGEF
ENSG00000066279	72.0029	0.266528	0.32929	0.809401	0.418285	0.999879	ASPM
ENSG00000066322	151.861	-0.107317	0.245391	-0.43733	0.661872	0.999879	ELOVL1
ENSG00000066379	60.5636	0.187631	0.32504	0.577257	0.563766	0.999879	ZNRD1
ENSG00000066422	24.6858	0.656524	0.429271	1.52939	0.126167	0.999879	ZBTB11
ENSG00000066427	23.3899	0.304577	0.455849	0.668153	0.504036	0.999879	ATXN3
ENSG00000066455	23.6235	-0.0326044	0.429621	-0.075891	0.939506	0.999879	GOLGA5
ENSG00000066557	36.1001	0.36353	0.363473	1.00016	0.317235	0.999879	LRRC40
ENSG00000066583	50.4716	-0.0330475	0.356861	-0.0926061	0.926217	0.999879	ISOC1
ENSG00000066651	23.5639	0.768027	0.44295	1.73389	0.0829374	0.999879	TRMT11
ENSG00000066654	37.606	0.0535964	0.382572	0.140095	0.888585	0.999879	THUMPD1
ENSG00000066697	65.9381	-0.179559	0.306682	-0.58549	0.558219	0.999879	MSANTD3
ENSG00000066735	122.735	-0.133657	0.338813	-0.394486	0.693222	0.999879	KIF26A
ENSG00000066739	11.1893	0.074845	0.609715	0.122754	0.902302	0.999879	ATG2B
ENSG00000066777	16.0687	-0.45313	0.514219	-0.881201	0.378209	0.999879	ARFGEF1
ENSG00000066827	13.0917	0.0787979	0.561943	0.140224	0.888483	0.999879	ZFAT
ENSG00000066855	50.8633	0.131027	0.332546	0.394012	0.693572	0.999879	MTFR1
ENSG00000066923	15.629	-0.0407642	0.528176	-0.0771793	0.938481	0.999879	STAG3
ENSG00000066926	40.0769	0.106386	0.361189	0.294543	0.768343	0.999879	FECH
ENSG00000067057	242.618	-0.0558163	0.257426	-0.216824	0.828345	0.999879	PFKP
ENSG00000067064	121.837	0.309716	0.266749	1.16108	0.245609	0.999879	IDI1
ENSG00000067066	35.1026	-0.206137	0.375008	-0.549687	0.582534	0.999879	SP100
ENSG00000067082	63.663	-0.474297	0.462473	-1.02557	0.305096	0.999879	KLF6
ENSG00000067113	32.4427	-0.530645	0.37636	-1.40994	0.158558	0.999879	PLPP1
ENSG00000067167	168.782	0.363419	0.261309	1.39076	0.164298	0.999879	TRAM1
ENSG00000067177	25.5454	-0.42902	0.455435	-0.942	0.346193	0.999879	PHKA1
ENSG00000067182	149.753	-0.177042	0.263047	-0.673044	0.50092	0.999879	TNFRSF1A
ENSG00000067208	8.74604	-0.140612	0.706262	-0.199093	0.84219	0.999879	EVI5
ENSG00000067221	6.96336	0.388141	0.726285	0.53442	0.593051	0.999879	STOML1
ENSG00000067225	3220.25	0.0430249	0.270851	0.158851	0.873787	0.999879	PKM
ENSG00000067248	39.8514	-0.0671881	0.39967	-0.168109	0.866497	0.999879	DHX29
ENSG00000067334	80.3211	0.147165	0.290076	0.507333	0.611921	0.999879	DNTTIP2
ENSG00000067365	20.3451	0.631698	0.492499	1.28264	0.199618	0.999879	METTL22
ENSG00000067369	42.5516	-0.542431	0.343561	-1.57885	0.11437	0.999879	TP53BP1
ENSG00000067533	46.745	-0.145569	0.344816	-0.422165	0.672905	0.999879	RRP15
ENSG00000067560	1052.98	-0.0465088	0.212814	-0.218541	0.827007	0.999879	RHOA
ENSG00000067596	32.6838	-0.172229	0.396112	-0.434798	0.663709	0.999879	DHX8
ENSG00000067606	12.1984	0.303533	0.588725	0.515577	0.60615	0.999879	PRKCZ
ENSG00000067704	125.155	-0.362786	0.280586	-1.29296	0.196026	0.999879	IARS2
ENSG00000067829	128.055	0.0779406	0.250428	0.311229	0.755626	0.999879	IDH3G
ENSG00000067836	22.8414	0.457151	0.453592	1.00785	0.313529	0.999879	ROGDI
ENSG00000067900	30.4222	-0.148833	0.398282	-0.373688	0.708637	0.999879	ROCK1
ENSG00000067955	47.3895	-0.160137	0.387145	-0.413635	0.679141	0.999879	CBFB
ENSG00000067992	17.6911	-0.264705	0.524812	-0.504381	0.613994	0.999879	PDK3
ENSG00000068001	67.5246	-0.190742	0.298042	-0.639983	0.522184	0.999879	HYAL2
ENSG00000068024	11.9509	-0.604695	0.66355	-0.911302	0.362136	0.999879	HDAC4
ENSG00000068028	40.985	0.301731	0.345238	0.87398	0.382129	0.999879	RASSF1
ENSG00000068079	16.7774	0.379593	0.529923	0.716318	0.473795	0.999879	IFI35
ENSG00000068097	17.9888	-0.460554	0.498183	-0.924468	0.355243	0.999879	HEATR6
ENSG00000068120	122.315	0.110074	0.248066	0.443727	0.65724	0.999879	COASY
ENSG00000068137	48.7113	-0.0516356	0.354122	-0.145813	0.884069	0.999879	PLEKHH3
ENSG00000068305	21.7436	-0.152604	0.476257	-0.320424	0.748647	0.999879	MEF2A
ENSG00000068308	63.7123	-0.243447	0.306979	-0.793042	0.427753	0.999879	OTUD5
ENSG00000068323	58.7397	-0.245469	0.320094	-0.766864	0.443162	0.999879	TFE3
ENSG00000068354	15.9553	0.106603	0.517043	0.206179	0.836651	0.999879	TBC1D25
ENSG00000068366	65.0659	-0.33071	0.316381	-1.04529	0.29589	0.999879	ACSL4
ENSG00000068383	24.3567	-0.183367	0.439854	-0.416882	0.676765	0.999879	INPP5A
ENSG00000068394	43.1433	0.0238713	0.348631	0.0684716	0.94541	0.999879	GPKOW
ENSG00000068400	24.6563	0.019235	0.438118	0.0439038	0.964981	0.999879	GRIPAP1
ENSG00000068438	149.826	0.0600501	0.243783	0.246327	0.805429	0.999879	FTSJ1
ENSG00000068489	19.5468	-0.743895	0.618417	-1.2029	0.229014	0.999879	PRR11
ENSG00000068650	12.1724	-0.512126	0.592059	-0.864992	0.387043	0.999879	ATP11A
ENSG00000068654	31.3148	-0.520133	0.41092	-1.26578	0.205593	0.999879	POLR1A
ENSG00000068697	237.331	-0.0160103	0.226316	-0.070743	0.943602	0.999879	LAPTM4A
ENSG00000068724	40.0798	-0.494963	0.359469	-1.37693	0.168534	0.999879	TTC7A
ENSG00000068745	62.5553	0.0673972	0.300996	0.223914	0.822824	0.999879	IP6K2
ENSG00000068784	9.31779	0.407576	0.651891	0.625221	0.531826	0.999879	SRBD1
ENSG00000068796	31.9808	-0.115177	0.379668	-0.303361	0.761614	0.999879	KIF2A
ENSG00000068878	32.673	0.0755276	0.379124	0.199216	0.842094	0.999879	PSME4
ENSG00000068885	14.6477	-0.2556	0.526897	-0.485104	0.627602	0.999879	IFT80
ENSG00000068903	42.2131	0.0554533	0.358583	0.154646	0.8771	0.999879	SIRT2
ENSG00000068912	48.9588	-0.177192	0.338988	-0.522707	0.601178	0.999879	ERLEC1
ENSG00000068971	9.45594	0.0693467	0.683072	0.101522	0.919136	0.999879	PPP2R5B
ENSG00000068985	11.1378	-0.210944	0.810875	-0.260143	0.794753	0.999879	PAGE1
ENSG00000069011	422.362	-0.161499	0.263775	-0.61226	0.540366	0.999879	PITX1
ENSG00000069248	59.5449	-0.181827	0.307849	-0.590636	0.554764	0.999879	NUP133
ENSG00000069275	305.51	0.0130523	0.253316	0.0515257	0.958907	0.999879	NUCKS1
ENSG00000069329	103.601	0.309097	0.333118	0.927889	0.353465	0.999879	VPS35
ENSG00000069345	80.5525	-0.098927	0.296866	-0.333238	0.738955	0.999879	DNAJA2
ENSG00000069399	74.4521	-0.104883	0.36151	-0.290126	0.77172	0.999879	BCL3
ENSG00000069424	28.7729	-0.177313	0.433142	-0.409364	0.682273	0.999879	KCNAB2
ENSG00000069431	7.76546	-0.141433	0.722462	-0.195766	0.844794	0.999879	ABCC9
ENSG00000069482	267.198	0.14105	0.254617	0.55397	0.579599	0.999879	GAL
ENSG00000069493	13.4806	0.931658	0.556733	1.67344	0.0942409	0.999879	CLEC2D
ENSG00000069509	38.1888	0.483419	0.359139	1.34605	0.178286	0.999879	FUNDC1
ENSG00000069535	7.63767	-0.0286208	0.726293	-0.0394067	0.968566	0.999879	MAOB
ENSG00000069702	10.5153	0.229375	0.653715	0.350879	0.725679	0.999879	TGFBR3
ENSG00000069849	291.263	0.0971692	0.220364	0.440949	0.65925	0.999879	ATP1B3
ENSG00000069869	16.9134	0.0338943	0.532375	0.0636664	0.949236	0.999879	NEDD4
ENSG00000069943	15.3512	0.185113	0.525564	0.352218	0.724675	0.999879	PIGB
ENSG00000069956	43.9981	-0.323339	0.377705	-0.856063	0.391963	0.999879	MAPK6
ENSG00000069966	43.7865	0.186386	0.364237	0.511717	0.608849	0.999879	GNB5
ENSG00000069974	22.6657	0.208231	0.46536	0.447462	0.654541	0.999879	RAB27A
ENSG00000069998	61.4575	-0.366843	0.313864	-1.1688	0.242485	0.999879	HDHD5
ENSG00000070010	104.582	0.0310459	0.263346	0.11789	0.906155	0.999879	UFD1
ENSG00000070018	10.5786	0.323654	0.600444	0.539024	0.58987	0.999879	LRP6
ENSG00000070047	15.2112	-0.836314	0.539559	-1.54999	0.121143	0.999879	PHRF1
ENSG00000070061	49.0792	-0.0104544	0.376326	-0.0277802	0.977837	0.999879	ELP1
ENSG00000070081	28.2423	0.314605	0.411932	0.76373	0.445028	0.999879	NUCB2
ENSG00000070087	179.069	0.055613	0.23849	0.233188	0.815616	0.999879	PFN2
ENSG00000070159	7.10729	0.211796	0.74652	0.283711	0.776631	0.999879	PTPN3
ENSG00000070214	31.6447	0.140934	0.409492	0.344167	0.730721	0.999879	SLC44A1
ENSG00000070269	7.89606	0.378248	0.716848	0.527654	0.59774	0.999879	TMEM260
ENSG00000070367	43.9626	-0.0952434	0.344235	-0.276681	0.782025	0.999879	EXOC5
ENSG00000070404	248.234	-0.132601	0.25884	-0.512289	0.608449	0.999879	FSTL3
ENSG00000070413	31.367	-0.473506	0.399439	-1.18543	0.235848	0.999879	DGCR2
ENSG00000070423	97.3165	-0.37333	0.282444	-1.32178	0.186241	0.999879	RNF126
ENSG00000070444	22.7809	-0.743513	0.480049	-1.54883	0.121423	0.999879	MNT
ENSG00000070476	10.8335	-0.766476	0.615977	-1.24433	0.21338	0.999879	ZXDC
ENSG00000070495	66.0024	0.684063	0.317759	2.15278	0.0313364	0.999879	JMJD6
ENSG00000070501	30.6096	0.261057	0.406292	0.642534	0.520526	0.999879	POLB
ENSG00000070610	21.3491	-0.167063	0.442646	-0.377418	0.705863	0.999879	GBA2
ENSG00000070614	45.4062	-0.581459	0.442419	-1.31427	0.188754	0.999879	NDST1
ENSG00000070669	69.1322	0.167763	0.32587	0.514815	0.606682	0.999879	ASNS
ENSG00000070718	12.1786	0.407266	0.598507	0.680471	0.496206	0.999879	AP3M2
ENSG00000070756	959.583	0.0383428	0.197063	0.194572	0.845728	0.999879	PABPC1
ENSG00000070761	47.017	0.0374088	0.337687	0.110779	0.911791	0.999879	CFAP20
ENSG00000070770	20.0465	-0.0572712	0.475502	-0.120444	0.904132	0.999879	CSNK2A2
ENSG00000070785	57.9434	-0.0904949	0.33308	-0.271691	0.78586	0.999879	EIF2B3
ENSG00000070814	105.543	-0.119915	0.278793	-0.430123	0.667106	0.999879	TCOF1
ENSG00000070831	269.171	-0.028373	0.220915	-0.128434	0.897805	0.999879	CDC42
ENSG00000070882	22.6906	-0.193198	0.492139	-0.392568	0.694639	0.999879	OSBPL3
ENSG00000070915	15.5035	-0.776329	0.74483	-1.04229	0.297277	0.999879	SLC12A3
ENSG00000070950	30.3971	-0.137691	0.388635	-0.354294	0.723118	0.999879	RAD18
ENSG00000070961	35.8456	-0.181376	0.383207	-0.47331	0.635992	0.999879	ATP2B1
ENSG00000071051	14.8058	-0.226512	0.529642	-0.427669	0.668892	0.999879	NCK2
ENSG00000071054	57.7074	0.166957	0.335715	0.497319	0.618964	0.999879	MAP4K4
ENSG00000071082	2663.4	0.30089	0.299065	1.0061	0.314366	0.999879	RPL31
ENSG00000071127	408.798	-0.273878	0.294125	-0.931159	0.351771	0.999879	WDR1
ENSG00000071189	22.4906	-0.0551897	0.458408	-0.120394	0.904171	0.999879	SNX13
ENSG00000071205	9.28901	0.250269	0.648561	0.385883	0.699583	0.999879	ARHGAP10
ENSG00000071242	33.5921	-0.370938	0.44545	-0.832726	0.405	0.999879	RPS6KA2
ENSG00000071243	29.4711	0.250862	0.397208	0.631563	0.527673	0.999879	ING3
ENSG00000071462	206.072	-0.132998	0.237448	-0.560115	0.575401	0.999879	BUD23
ENSG00000071537	24.6209	-0.327695	0.430236	-0.761663	0.446261	0.999879	SEL1L
ENSG00000071539	268.138	-0.270824	0.219973	-1.23117	0.218259	0.999879	TRIP13
ENSG00000071553	221.161	0.239462	0.233558	1.02528	0.305233	0.999879	ATP6AP1
ENSG00000071564	119.6	-0.194817	0.257714	-0.755942	0.449684	0.999879	TCF3
ENSG00000071626	251.352	0.0331295	0.222476	0.148913	0.881622	0.999879	DAZAP1
ENSG00000071655	107.307	-0.0434386	0.277879	-0.156322	0.875779	0.999879	MBD3
ENSG00000071794	37.042	0.373953	0.40799	0.916574	0.359366	0.999879	HLTF
ENSG00000071859	198.246	0.162727	0.246631	0.659799	0.509383	0.999879	FAM50A
ENSG00000071889	71.7237	-0.0226057	0.303133	-0.0745735	0.940554	0.999879	FAM3A
ENSG00000071894	63.5333	0.526928	0.317922	1.65741	0.0974363	0.999879	CPSF1
ENSG00000071967	37.1355	0.0914332	0.370888	0.246525	0.805276	0.999879	CYBRD1
ENSG00000071994	141.96	0.105204	0.267873	0.39274	0.694512	0.999879	PDCD2
ENSG00000072041	14.199	-0.217567	0.53047	-0.410139	0.681704	0.999879	SLC6A15
ENSG00000072042	66.9222	-0.0680778	0.349364	-0.194862	0.845501	0.999879	RDH11
ENSG00000072062	103.815	0.0952031	0.313674	0.30351	0.761501	0.999879	PRKACA
ENSG00000072110	234.233	-0.0388698	0.374811	-0.103705	0.917403	0.999879	ACTN1
ENSG00000072121	12.6055	-0.310584	0.632695	-0.490891	0.623504	0.999879	ZFYVE26
ENSG00000072134	21.8334	-0.119016	0.451534	-0.263581	0.792103	0.999879	EPN2
ENSG00000072135	30.5597	0.133243	0.408028	0.326552	0.744006	0.999879	PTPN18
ENSG00000072163	28.1214	0.0953067	1.12689	0.0845752	0.932599	0.999879	LIMS2
ENSG00000072195	19.0738	-0.283756	0.527781	-0.53764	0.590825	0.999879	SPEG
ENSG00000072210	166.396	-0.134002	0.295195	-0.453945	0.649868	0.999879	ALDH3A2
ENSG00000072274	252.105	-0.0571186	0.237522	-0.240477	0.80996	0.999879	TFRC
ENSG00000072310	149.647	0.19817	0.256566	0.772395	0.43988	0.999879	SREBF1
ENSG00000072364	46.1856	-0.192698	0.367419	-0.524465	0.599955	0.999879	AFF4
ENSG00000072401	22.0565	0.323697	0.440312	0.735154	0.462246	0.999879	UBE2D1
ENSG00000072415	25.925	-0.0396821	0.416748	-0.0952185	0.924141	0.999879	MPP5
ENSG00000072422	15.9739	-0.233718	0.533307	-0.438243	0.66121	0.999879	RHOBTB1
ENSG00000072501	102.637	-0.57608	0.302351	-1.90533	0.0567368	0.999879	SMC1A
ENSG00000072506	308.533	0.126001	0.227784	0.553161	0.580153	0.999879	HSD17B10
ENSG00000072518	21.1868	-0.488939	0.459053	-1.0651	0.286829	0.999879	MARK2
ENSG00000072571	50.6397	0.356442	0.363147	0.981538	0.326328	0.999879	HMMR
ENSG00000072609	15.7303	0.0348722	0.512311	0.0680685	0.945731	0.999879	CHFR
ENSG00000072682	77.1784	-0.109975	0.283826	-0.387475	0.698405	0.999879	P4HA2
ENSG00000072736	24.5259	-0.365023	0.423818	-0.861273	0.389088	0.999879	NFATC3
ENSG00000072756	39.1709	0.119076	0.369622	0.322156	0.747334	0.999879	TRNT1
ENSG00000072778	146.072	0.0941953	0.23903	0.394073	0.693527	0.999879	ACADVL
ENSG00000072786	12.2417	0.215494	0.568751	0.378889	0.70477	0.999879	STK10
ENSG00000072803	59.2297	-0.154458	0.302991	-0.509778	0.610207	0.999879	FBXW11
ENSG00000072832	9.37169	-0.806962	0.666201	-1.21129	0.225785	0.999879	CRMP1
ENSG00000072849	73.7539	0.291541	0.289169	1.0082	0.313357	0.999879	DERL2
ENSG00000072864	10.1839	0.241168	0.639727	0.376987	0.706184	0.999879	NDE1
ENSG00000072954	8.03639	0.0641376	0.751516	0.0853444	0.931988	0.999879	TMEM38A
ENSG00000072958	99.1053	-0.161327	0.276473	-0.583516	0.559546	0.999879	AP1M1
ENSG00000073008	54.6726	-0.273042	0.327232	-0.8344	0.404056	0.999879	PVR
ENSG00000073050	42.6734	0.104528	0.362032	0.288727	0.772791	0.999879	XRCC1
ENSG00000073060	196.962	0.0885168	0.240462	0.368111	0.712791	0.999879	SCARB1
ENSG00000073111	192.22	-0.139927	0.224057	-0.624517	0.532288	0.999879	MCM2
ENSG00000073150	9.74388	-0.093112	0.651673	-0.142882	0.886384	0.999879	PANX2
ENSG00000073169	43.2508	0.48073	0.346685	1.38665	0.165549	0.999879	SELENOO
ENSG00000073350	12.452	0.359208	0.569003	0.631293	0.527849	0.999879	LLGL2
ENSG00000073417	29.8218	0.252427	0.405938	0.621836	0.53405	0.999879	PDE8A
ENSG00000073536	51.2734	0.379301	0.341518	1.11063	0.266726	0.999879	NLE1
ENSG00000073578	497.332	-0.0701726	0.203295	-0.345177	0.729961	0.999879	SDHA
ENSG00000073584	107.877	-0.26965	0.260899	-1.03354	0.301352	0.999879	SMARCE1
ENSG00000073614	23.8961	-0.199665	0.433576	-0.460508	0.645152	0.999879	KDM5A
ENSG00000073712	146.385	0.0365725	0.254629	0.14363	0.885792	0.999879	FERMT2
ENSG00000073756	9.70578	0.567572	0.642937	0.88278	0.377355	0.999879	PTGS2
ENSG00000073803	32.3984	0.306569	0.394351	0.7774	0.436923	0.999879	MAP3K13
ENSG00000073921	107.448	-0.0640185	0.261636	-0.244685	0.8067	0.999879	PICALM
ENSG00000073969	52.1394	0.0696134	0.358568	0.194143	0.846064	0.999879	NSF
ENSG00000074047	9.78242	-1.17573	0.679144	-1.73119	0.0834176	0.999879	GLI2
ENSG00000074054	16.9249	-0.322068	0.497025	-0.647991	0.516991	0.999879	CLASP1
ENSG00000074071	382.421	0.0578801	0.247749	0.233624	0.815277	0.999879	MRPS34
ENSG00000074181	51.319	-0.181591	0.425463	-0.426808	0.669519	0.999879	NOTCH3
ENSG00000074201	185.065	-0.0066737	0.290618	-0.0229638	0.981679	0.999879	CLNS1A
ENSG00000074211	9.42882	-0.62455	0.676289	-0.923496	0.355749	0.999879	PPP2R2C
ENSG00000074219	43.6418	0.0968605	0.376454	0.257297	0.796949	0.999879	TEAD2
ENSG00000074266	36.5312	0.221853	0.368955	0.601302	0.547639	0.999879	EED
ENSG00000074319	72.5977	-0.10993	0.308985	-0.355778	0.722007	0.999879	TSG101
ENSG00000074356	44.0124	-0.25398	0.355401	-0.71463	0.474838	0.999879	NCBP3
ENSG00000074370	37.5164	0.0785549	0.394714	0.199017	0.842249	0.999879	ATP2A3
ENSG00000074410	42.9618	-0.27763	0.39653	-0.700148	0.483835	0.999879	CA12
ENSG00000074416	75.6095	0.0107205	0.337548	0.0317598	0.974664	0.999879	MGLL
ENSG00000074527	9.80347	-0.331018	0.80969	-0.408821	0.682671	0.999879	NTN4
ENSG00000074582	63.971	-0.00179991	0.310198	-0.00580246	0.99537	0.999879	BCS1L
ENSG00000074590	15.9196	-0.573768	0.615966	-0.931494	0.351598	0.999879	NUAK1
ENSG00000074603	21.0587	-0.182429	0.454609	-0.401288	0.688208	0.999879	DPP8
ENSG00000074657	24.015	-0.00351846	0.453606	-0.00775663	0.993811	0.999879	ZNF532
ENSG00000074695	143.553	0.183006	0.273761	0.66849	0.503821	0.999879	LMAN1
ENSG00000074696	110.257	0.210251	0.295744	0.710921	0.477133	0.999879	HACD3
ENSG00000074755	15.477	-0.694043	0.532785	-1.30267	0.192687	0.999879	ZZEF1
ENSG00000074800	5979.37	0.100185	0.19722	0.507984	0.611464	0.999879	ENO1
ENSG00000074842	294.962	0.0861882	0.228949	0.376451	0.706582	0.999879	MYDGF
ENSG00000074935	13.9897	0.520954	0.545125	0.955658	0.339245	0.999879	TUBE1
ENSG00000074964	15.8065	0.124023	0.508889	0.243713	0.807453	0.999879	ARHGEF10L
ENSG00000075089	28.2823	0.212573	0.421361	0.504491	0.613916	0.999879	ACTR6
ENSG00000075131	25.7885	0.365084	0.451771	0.808117	0.419023	0.999879	TIPIN
ENSG00000075142	332.662	0.00247981	0.236869	0.0104691	0.991647	0.999879	SRI
ENSG00000075151	58.5678	-0.480687	0.309022	-1.55551	0.119825	0.999879	EIF4G3
ENSG00000075188	67.73	-0.18794	0.329695	-0.570041	0.56865	0.999879	NUP37
ENSG00000075213	11.447	0.0485457	0.658063	0.0737706	0.941193	0.999879	SEMA3A
ENSG00000075218	45.4532	-0.226594	0.335964	-0.67446	0.500019	0.999879	GTSE1
ENSG00000075223	105.639	0.321563	0.259483	1.23925	0.215255	0.999879	SEMA3C
ENSG00000075234	52.0055	-0.020697	0.320543	-0.0645685	0.948518	0.999879	TTC38
ENSG00000075239	84.5027	0.173488	0.322053	0.538693	0.590099	0.999879	ACAT1
ENSG00000075275	18.6829	0.291263	0.504716	0.577083	0.563883	0.999879	CELSR1
ENSG00000075292	39.0897	0.0978168	0.415488	0.235426	0.813878	0.999879	ZNF638
ENSG00000075303	13.4513	-0.474329	0.570273	-0.831757	0.405546	0.999879	SLC25A40
ENSG00000075336	59.6631	0.190055	0.34355	0.553208	0.580121	0.999879	TIMM21
ENSG00000075391	12.797	-0.195147	0.562992	-0.346625	0.728873	0.999879	RASAL2
ENSG00000075399	8.04132	0.153144	0.692553	0.22113	0.824991	0.999879	VPS9D1
ENSG00000075407	14.115	-0.131957	0.571587	-0.23086	0.817424	0.999879	ZNF37A
ENSG00000075413	32.513	0.245123	0.374666	0.654245	0.512954	0.999879	MARK3
ENSG00000075415	980.466	-0.0043861	0.189278	-0.0231728	0.981512	0.999879	SLC25A3
ENSG00000075420	34.5938	-0.0248159	0.434844	-0.0570685	0.954491	0.999879	FNDC3B
ENSG00000075426	72.8602	-0.784504	0.360001	-2.17917	0.029319	0.999879	FOSL2
ENSG00000075461	10.7978	0.118113	0.641661	0.184074	0.853956	0.999879	CACNG4
ENSG00000075539	12.4811	-0.128812	0.578177	-0.22279	0.823699	0.999879	FRYL
ENSG00000075568	18.9841	0.373835	0.50194	0.74478	0.456405	0.999879	TMEM131
ENSG00000075618	674.523	-0.154675	0.249138	-0.620841	0.534704	0.999879	FSCN1
ENSG00000075624	10070.6	-0.160308	0.288299	-0.556048	0.578178	0.999879	ACTB
ENSG00000075643	42.4469	-0.0608685	0.367769	-0.165507	0.868545	0.999879	MOCOS
ENSG00000075651	17.6705	-0.308695	0.482411	-0.639899	0.522238	0.999879	PLD1
ENSG00000075702	23.4954	-0.205085	0.436697	-0.469628	0.638621	0.999879	WDR62
ENSG00000075711	39.2824	-0.185469	0.361103	-0.513618	0.607519	0.999879	DLG1
ENSG00000075785	199.627	-0.208409	0.23229	-0.897191	0.369617	0.999879	RAB7A
ENSG00000075790	37.8276	-0.194529	0.366389	-0.530937	0.595462	0.999879	BCAP29
ENSG00000075856	43.2276	-0.409208	0.343381	-1.1917	0.233378	0.999879	SART3
ENSG00000075914	68.3608	0.208643	0.326119	0.639775	0.522319	0.999879	EXOSC7
ENSG00000075945	13.0313	0.241008	0.552851	0.435937	0.662883	0.999879	KIFAP3
ENSG00000075975	44.4166	-0.368572	0.361484	-1.01961	0.307914	0.999879	MKRN2
ENSG00000076003	164.203	-0.0418177	0.260509	-0.160523	0.872469	0.999879	MCM6
ENSG00000076043	139.546	-0.115019	0.270915	-0.424559	0.671159	0.999879	REXO2
ENSG00000076053	42.8458	0.178094	0.34956	0.509479	0.610416	0.999879	RBM7
ENSG00000076067	17.5894	-0.572568	0.504384	-1.13518	0.256299	0.999879	RBMS2
ENSG00000076108	33.8648	-0.231614	0.399124	-0.580306	0.561708	0.999879	BAZ2A
ENSG00000076201	26.7419	-0.650543	0.49607	-1.31139	0.189725	0.999879	PTPN23
ENSG00000076242	62.7771	0.20142	0.338123	0.595699	0.551377	0.999879	MLH1
ENSG00000076248	81.7271	-0.00523478	0.283964	-0.0184347	0.985292	0.999879	UNG
ENSG00000076321	12.4758	-0.316986	0.581808	-0.544828	0.585872	0.999879	KLHL20
ENSG00000076351	21.2153	-0.0844158	0.454644	-0.185674	0.8527	0.999879	SLC46A1
ENSG00000076382	92.6523	-0.244072	0.276913	-0.881405	0.378099	0.999879	SPAG5
ENSG00000076513	22.2144	-0.158678	0.468642	-0.338591	0.734918	0.999879	ANKRD13A
ENSG00000076554	179.057	0.0450405	0.235047	0.191623	0.848037	0.999879	TPD52
ENSG00000076604	122.402	-0.143696	0.290967	-0.493854	0.621409	0.999879	TRAF4
ENSG00000076650	11.7844	0.566964	0.603295	0.939778	0.347331	0.999879	GPATCH1
ENSG00000076662	18.5858	-0.0772584	0.490682	-0.157451	0.874889	0.999879	ICAM3
ENSG00000076685	15.7485	-0.0622379	0.518872	-0.119948	0.904524	0.999879	NT5C2
ENSG00000076706	200.111	-0.179924	0.263658	-0.682414	0.494977	0.999879	MCAM
ENSG00000076770	20.7666	0.0574761	0.607581	0.0945981	0.924634	0.999879	MBNL3
ENSG00000076864	9.10055	-0.0559035	0.643602	-0.0868602	0.930783	0.999879	RAP1GAP
ENSG00000076924	42.8037	0.27308	0.340763	0.80138	0.422912	0.999879	XAB2
ENSG00000076928	39.8133	0.17393	0.357376	0.486687	0.62648	0.999879	ARHGEF1
ENSG00000076944	45.2846	0.263554	0.351874	0.749001	0.453857	0.999879	STXBP2
ENSG00000076984	42.911	-0.340199	0.371279	-0.916291	0.359514	0.999879	MAP2K7
ENSG00000077044	80.9907	-0.091785	0.28527	-0.321748	0.747644	0.999879	DGKD
ENSG00000077097	87.7732	-0.3929	0.323828	-1.2133	0.225015	0.999879	TOP2B
ENSG00000077147	137.764	-0.00970178	0.242277	-0.0400441	0.968058	0.999879	TM9SF3
ENSG00000077150	25.0813	-0.101774	0.476179	-0.213731	0.830757	0.999879	NFKB2
ENSG00000077152	126.865	0.00688485	0.250189	0.0275185	0.978046	0.999879	UBE2T
ENSG00000077232	81.4493	-0.0782817	0.329472	-0.237597	0.812193	0.999879	DNAJC10
ENSG00000077235	73.6053	-0.279469	0.315502	-0.885794	0.375729	0.999879	GTF3C1
ENSG00000077254	43.9743	-0.324176	0.35709	-0.907829	0.363969	0.999879	USP33
ENSG00000077312	191.88	0.116823	0.24584	0.475202	0.634643	0.999879	SNRPA
ENSG00000077348	93.9045	0.118115	0.265917	0.444181	0.656911	0.999879	EXOSC5
ENSG00000077380	93.8643	-0.114747	0.312648	-0.367018	0.713606	0.999879	DYNC1I2
ENSG00000077454	12.2661	0.180597	0.58551	0.308445	0.757744	0.999879	LRCH4
ENSG00000077458	18.1304	0.86476	0.50512	1.71199	0.0868985	0.999879	FAM76B
ENSG00000077463	28.3945	0.155421	0.419489	0.370501	0.711009	0.999879	SIRT6
ENSG00000077514	33.5442	-0.00933783	0.375056	-0.0248972	0.980137	0.999879	POLD3
ENSG00000077549	470.81	-0.0558002	0.243409	-0.229244	0.818679	0.999879	CAPZB
ENSG00000077684	42.9156	0.0723829	0.348894	0.207464	0.835647	0.999879	JADE1
ENSG00000077713	25.9203	-0.0441578	0.413548	-0.106778	0.914965	0.999879	SLC25A43
ENSG00000077721	149.134	0.10712	0.255553	0.419168	0.675093	0.999879	UBE2A
ENSG00000077782	14.0234	-0.159806	0.574585	-0.278124	0.780917	0.999879	FGFR1
ENSG00000077942	299.5	0.0349802	0.28631	0.122176	0.90276	0.999879	FBLN1
ENSG00000078018	13.815	0.455401	0.536685	0.848544	0.396135	0.999879	MAP2
ENSG00000078043	19.631	0.165593	0.46431	0.356643	0.721359	0.999879	PIAS2
ENSG00000078061	87.3655	0.03518	0.29203	0.120467	0.904113	0.999879	ARAF
ENSG00000078070	14.1188	0.0398099	0.557053	0.0714653	0.943027	0.999879	MCCC1
ENSG00000078124	15.9015	-0.245688	0.505063	-0.48645	0.626648	0.999879	ACER3
ENSG00000078140	146.112	-0.0618971	0.242569	-0.255173	0.79859	0.999879	UBE2K
ENSG00000078142	21.1623	0.176881	0.453186	0.390305	0.696311	0.999879	PIK3C3
ENSG00000078237	42.9598	0.203361	0.359238	0.56609	0.571332	0.999879	TIGAR
ENSG00000078246	20.6861	-0.0164122	0.463121	-0.0354382	0.97173	0.999879	TULP3
ENSG00000078269	41.4953	0.0408745	0.359941	0.113559	0.909587	0.999879	SYNJ2
ENSG00000078304	119.984	0.00853231	0.261434	0.0326366	0.973964	0.999879	PPP2R5C
ENSG00000078369	296.602	0.0228729	0.219865	0.104031	0.917144	0.999879	GNB1
ENSG00000078401	23.2957	-1.30704	2.06289	-0.633596	0.526345	0.999879	EDN1
ENSG00000078403	21.2693	-0.075803	0.447071	-0.169555	0.86536	0.999879	MLLT10
ENSG00000078618	166.393	-0.0937447	0.254986	-0.367647	0.713137	0.999879	NRDC
ENSG00000078668	211.513	0.0975027	0.262673	0.371194	0.710493	0.999879	VDAC3
ENSG00000078674	33.7746	-0.363694	0.41894	-0.868129	0.385324	0.999879	PCM1
ENSG00000078747	18.0925	0.384752	0.504437	0.762736	0.445621	0.999879	ITCH
ENSG00000078804	13.8361	-0.131824	0.578867	-0.227728	0.819858	0.999879	TP53INP2
ENSG00000078808	245.722	-0.0598733	0.225853	-0.265098	0.790934	0.999879	SDF4
ENSG00000078902	20.2109	-0.190928	0.484225	-0.394296	0.693363	0.999879	TOLLIP
ENSG00000078967	25.098	0.0604581	0.449827	0.134403	0.893084	0.999879	UBE2D4
ENSG00000079134	20.3858	0.251463	0.496975	0.505987	0.612866	0.999879	THOC1
ENSG00000079150	29.6073	0.485598	0.412048	1.1785	0.238598	0.999879	FKBP7
ENSG00000079156	9.52923	0.862083	0.67736	1.27271	0.203121	0.999879	OSBPL6
ENSG00000079246	635.001	-0.018085	0.25621	-0.0705867	0.943727	0.999879	XRCC5
ENSG00000079257	47.4801	0.327092	0.433668	0.754245	0.450702	0.999879	LXN
ENSG00000079277	26.8806	0.0177676	0.416741	0.0426348	0.965993	0.999879	MKNK1
ENSG00000079313	12.4851	-0.2201	0.57087	-0.385551	0.699829	0.999879	REXO1
ENSG00000079332	103.813	-0.125135	0.272096	-0.459892	0.645594	0.999879	SAR1A
ENSG00000079387	20.1115	-0.0692558	0.459129	-0.150842	0.880101	0.999879	SENP1
ENSG00000079432	41.2074	-0.0257269	0.410539	-0.0626661	0.950032	0.999879	CIC
ENSG00000079459	201.258	0.00585637	0.236501	0.0247626	0.980244	0.999879	FDFT1
ENSG00000079462	89.9693	0.251159	0.286514	0.876604	0.380702	0.999879	PAFAH1B3
ENSG00000079482	14.3639	0.352817	0.533695	0.661083	0.508559	0.999879	OPHN1
ENSG00000079616	195.446	0.0752395	0.247404	0.304116	0.76104	0.999879	KIF22
ENSG00000079691	10.268	-0.0898818	0.63938	-0.140576	0.888205	0.999879	CARMIL1
ENSG00000079739	124.838	-0.0965507	0.285919	-0.337685	0.7356	0.999879	PGM1
ENSG00000079785	153.96	0.147728	0.265074	0.557308	0.577317	0.999879	DDX1
ENSG00000079805	81.5221	0.171658	0.30315	0.566247	0.571226	0.999879	DNM2
ENSG00000079819	33.2141	-0.430429	0.373279	-1.1531	0.248868	0.999879	EPB41L2
ENSG00000079950	25.9085	-0.0652643	0.410022	-0.159172	0.873533	0.999879	STX7
ENSG00000079974	18.6992	-0.100263	0.485629	-0.20646	0.836432	0.999879	RABL2B
ENSG00000079999	41.8944	-0.267784	0.345888	-0.77419	0.438818	0.999879	KEAP1
ENSG00000080189	60.6226	-0.0965773	0.318692	-0.303042	0.761857	0.999879	SLC35C2
ENSG00000080298	9.71341	0.51888	0.659323	0.786989	0.431288	0.999879	RFX3
ENSG00000080345	47.8461	0.0752232	0.371528	0.20247	0.839549	0.999879	RIF1
ENSG00000080371	45.4442	-0.224644	0.335841	-0.668899	0.50356	0.999879	RAB21
ENSG00000080503	43.2389	-0.218478	0.344729	-0.633767	0.526233	0.999879	SMARCA2
ENSG00000080546	9.96143	0.0724104	0.669726	0.108119	0.913901	0.999879	SESN1
ENSG00000080603	33.5959	-1.06649	0.459627	-2.32033	0.0203232	0.999879	SRCAP
ENSG00000080608	55.6657	0.236284	0.325285	0.726389	0.4676	0.999879	PUM3
ENSG00000080802	17.4363	0.53235	0.510933	1.04192	0.297449	0.999879	CNOT4
ENSG00000080815	35.3474	-0.015609	0.370398	-0.042141	0.966386	0.999879	PSEN1
ENSG00000080819	21.6984	-0.705513	0.461459	-1.52887	0.126296	0.999879	CPOX
ENSG00000080822	24.9309	0.334369	0.449556	0.743777	0.457011	0.999879	CLDND1
ENSG00000080824	1498.97	0.281087	0.266806	1.05353	0.2921	0.999879	HSP90AA1
ENSG00000080839	22.9219	-0.203514	0.460092	-0.442334	0.658248	0.999879	RBL1
ENSG00000080845	34.9615	-0.100427	0.412381	-0.243529	0.807595	0.999879	DLGAP4
ENSG00000080986	51.7811	0.421458	0.350054	1.20398	0.228598	0.999879	NDC80
ENSG00000081014	11.908	-0.207986	0.606565	-0.342891	0.73168	0.999879	AP4E1
ENSG00000081019	7.71768	0.56537	0.723235	0.781724	0.434377	0.999879	RSBN1
ENSG00000081026	9.13947	-0.31368	0.654122	-0.479544	0.631552	0.999879	MAGI3
ENSG00000081041	7.10427	-1.15389	0.843975	-1.36721	0.17156	0.999879	CXCL2
ENSG00000081052	45.625	0.0520239	0.370318	0.140484	0.888277	0.999879	COL4A4
ENSG00000081059	17.6481	-0.00676035	0.494318	-0.0136761	0.989088	0.999879	TCF7
ENSG00000081087	20.4903	-0.193101	0.470647	-0.41029	0.681594	0.999879	OSTM1
ENSG00000081154	153.201	0.193605	0.261054	0.741626	0.458314	0.999879	PCNP
ENSG00000081177	12.8878	-0.215456	0.569653	-0.378224	0.705264	0.999879	EXD2
ENSG00000081189	17.2696	-0.0753542	0.513723	-0.146682	0.883383	0.999879	MEF2C
ENSG00000081307	35.7865	-0.0942382	0.386705	-0.243695	0.807467	0.999879	UBA5
ENSG00000081320	21.6207	0.454716	0.45668	0.995699	0.319396	0.999879	STK17B
ENSG00000081386	6.77866	0.674389	0.786631	0.857313	0.391272	0.999879	ZNF510
ENSG00000081692	41.0296	0.193905	0.39347	0.492807	0.622149	0.999879	JMJD4
ENSG00000081721	35.8571	0.128683	0.363238	0.354266	0.723139	0.999879	DUSP12
ENSG00000081760	34.0439	0.454882	0.392719	1.15829	0.246747	0.999879	AACS
ENSG00000081791	52.5079	0.0257547	0.328683	0.0783573	0.937544	0.999879	KIAA0141
ENSG00000081870	92.5857	0.0235152	0.278979	0.0842902	0.932826	0.999879	HSPB11
ENSG00000082014	15.3491	0.13363	0.522419	0.255791	0.798112	0.999879	SMARCD3
ENSG00000082068	93.1041	0.148819	0.267982	0.555332	0.578668	0.999879	WDR70
ENSG00000082146	24.9976	0.0344292	0.427967	0.0804482	0.935881	0.999879	STRADB
ENSG00000082153	543.357	0.132778	0.223918	0.592978	0.553196	0.999879	BZW1
ENSG00000082212	52.6539	0.348544	0.34716	1.00399	0.315385	0.999879	ME2
ENSG00000082213	60.8633	0.400651	0.306183	1.30854	0.190692	0.999879	C5orf22
ENSG00000082258	17.2012	-0.0553987	0.521134	-0.106304	0.915341	0.999879	CCNT2
ENSG00000082269	8.79833	-0.458577	0.667969	-0.686525	0.492382	0.999879	FAM135A
ENSG00000082458	25.0102	0.0972437	0.429697	0.226308	0.820962	0.999879	DLG3
ENSG00000082512	10.2921	0.0755005	0.636883	0.118547	0.905634	0.999879	TRAF5
ENSG00000082515	176.846	-0.068744	0.240577	-0.285747	0.775072	0.999879	MRPL22
ENSG00000082516	41.8095	-0.168001	0.380104	-0.441988	0.658498	0.999879	GEMIN5
ENSG00000082641	87.5669	-0.170099	0.283347	-0.600318	0.548294	0.999879	NFE2L1
ENSG00000082701	38.428	-0.068643	0.459422	-0.149412	0.881229	0.999879	GSK3B
ENSG00000082781	64.6857	-0.0578767	0.345573	-0.167481	0.866992	0.999879	ITGB5
ENSG00000082805	24.5576	-0.870546	0.46449	-1.8742	0.0609032	0.999879	ERC1
ENSG00000082898	201.119	-0.155752	0.264208	-0.589506	0.555522	0.999879	XPO1
ENSG00000082996	23.8331	0.107658	0.453676	0.237301	0.812423	0.999879	RNF13
ENSG00000083093	16.7532	-0.242613	0.52158	-0.465149	0.641825	0.999879	PALB2
ENSG00000083099	30.5391	-0.176914	0.427446	-0.413886	0.678958	0.999879	LYRM2
ENSG00000083123	13.5894	-0.0206281	0.564723	-0.0365279	0.970861	0.999879	BCKDHB
ENSG00000083168	15.2268	-0.580014	0.568484	-1.02028	0.307594	0.999879	KAT6A
ENSG00000083223	11.1355	-0.297526	0.585523	-0.508137	0.611357	0.999879	ZCCHC6
ENSG00000083312	221.346	-0.088809	0.233401	-0.380499	0.703575	0.999879	TNPO1
ENSG00000083444	267.891	0.266016	0.256589	1.03674	0.299857	0.999879	PLOD1
ENSG00000083454	63.4654	0.101472	0.330694	0.306845	0.758961	0.999879	P2RX5
ENSG00000083457	96.5213	0.250081	0.281927	0.887043	0.375056	0.999879	ITGAE
ENSG00000083520	63.8569	-0.0239922	0.317378	-0.0755951	0.939741	0.999879	DIS3
ENSG00000083535	14.2103	1.21324	0.579782	2.09258	0.0363864	0.999879	PIBF1
ENSG00000083544	19.7765	0.148163	0.491442	0.301486	0.763044	0.999879	TDRD3
ENSG00000083635	14.079	-0.0900925	0.558389	-0.161344	0.871823	0.999879	NUFIP1
ENSG00000083642	31.3194	-0.0562933	0.379437	-0.14836	0.882059	0.999879	PDS5B
ENSG00000083720	290.597	-0.0400765	0.241151	-0.166188	0.868009	0.999879	OXCT1
ENSG00000083750	9.14682	0.471216	0.693119	0.679849	0.4966	0.999879	RRAGB
ENSG00000083799	18.3311	-0.155929	0.488409	-0.319259	0.74953	0.999879	CYLD
ENSG00000083807	65.2626	0.403379	0.323865	1.24551	0.212943	0.999879	SLC27A5
ENSG00000083828	10.9905	0.187143	0.618269	0.302689	0.762127	0.999879	ZNF586
ENSG00000083844	8.9204	0.534257	0.683396	0.781768	0.434351	0.999879	ZNF264
ENSG00000083845	2629.02	0.19628	0.225617	0.869967	0.384318	0.999879	RPS5
ENSG00000083857	30.0053	-1.03054	0.428283	-2.4062	0.0161192	0.999879	FAT1
ENSG00000083896	50.3776	0.0919227	0.328931	0.279459	0.779892	0.999879	YTHDC1
ENSG00000083937	57.1278	0.130664	0.321994	0.405795	0.684893	0.999879	CHMP2B
ENSG00000084070	19.6138	0.096502	0.470249	0.205215	0.837404	0.999879	SMAP2
ENSG00000084072	88.9896	-0.194721	0.275418	-0.707001	0.479566	0.999879	PPIE
ENSG00000084073	92.055	-0.0712025	0.293719	-0.242417	0.808457	0.999879	ZMPSTE24
ENSG00000084090	141.718	-0.320927	0.240599	-1.33387	0.182248	0.999879	STARD7
ENSG00000084092	37.043	0.0494638	0.385961	0.128158	0.898024	0.999879	NOA1
ENSG00000084093	14.8557	-0.203494	0.534997	-0.380364	0.703675	0.999879	REST
ENSG00000084112	15.1873	-0.430029	0.554969	-0.774871	0.438416	0.999879	SSH1
ENSG00000084207	1807.78	0.214428	0.203324	1.05461	0.291603	0.999879	GSTP1
ENSG00000084234	99.5121	-0.147496	0.293207	-0.503044	0.614933	0.999879	APLP2
ENSG00000084463	119.719	-0.196543	0.251413	-0.781754	0.434359	0.999879	WBP11
ENSG00000084623	605.052	0.0647898	0.216333	0.299491	0.764565	0.999879	EIF3I
ENSG00000084652	44.8519	-0.458427	0.34463	-1.3302	0.183452	0.999879	TXLNA
ENSG00000084693	59.0098	-0.280494	0.311634	-0.900076	0.36808	0.999879	AGBL5
ENSG00000084731	8.34125	-0.0120963	0.668488	-0.0180951	0.985563	0.999879	KIF3C
ENSG00000084733	169.076	-0.080395	0.258157	-0.31142	0.755482	0.999879	RAB10
ENSG00000084754	237.408	0.119683	0.254409	0.470433	0.638045	0.999879	HADHA
ENSG00000084764	12.8675	-0.107427	0.593188	-0.181101	0.856289	0.999879	MAPRE3
ENSG00000084774	69.1121	-0.0836411	0.330323	-0.25321	0.800106	0.999879	CAD
ENSG00000085063	728.419	0.248979	0.235008	1.05945	0.289395	0.999879	CD59
ENSG00000085117	65.4929	-0.243102	0.36592	-0.664359	0.506461	0.999879	CD82
ENSG00000085224	49.4184	-0.205138	0.374577	-0.547653	0.58393	0.999879	ATRX
ENSG00000085231	80.6699	0.385409	0.288311	1.33678	0.181293	0.999879	AK6
ENSG00000085274	22.4147	0.248889	0.467927	0.531898	0.594797	0.999879	MYNN
ENSG00000085276	15.3346	-0.257646	0.603346	-0.427028	0.669359	0.999879	MECOM
ENSG00000085365	47.5532	0.112489	0.352019	0.319553	0.749307	0.999879	SCAMP1
ENSG00000085377	37.172	-0.12487	0.360271	-0.3466	0.728892	0.999879	PREP
ENSG00000085415	61.9993	-0.104435	0.325808	-0.320543	0.748557	0.999879	SEH1L
ENSG00000085433	12.6123	0.329163	0.596387	0.55193	0.580997	0.999879	WDR47
ENSG00000085449	28.9543	-0.0875261	0.39893	-0.219402	0.826337	0.999879	WDFY1
ENSG00000085491	52.3563	0.25753	0.34551	0.745362	0.456053	0.999879	SLC25A24
ENSG00000085511	13.3018	-0.242772	0.556589	-0.436179	0.662707	0.999879	MAP3K4
ENSG00000085644	9.01928	-0.1674	0.677812	-0.246971	0.804931	0.999879	ZNF213
ENSG00000085662	592.567	-0.0343416	0.248775	-0.138043	0.890207	0.999879	AKR1B1
ENSG00000085719	48.7813	0.138904	0.366459	0.379044	0.704655	0.999879	CPNE3
ENSG00000085721	60.0012	0.208096	0.323948	0.642375	0.52063	0.999879	RRN3
ENSG00000085733	121.454	-0.211323	0.277291	-0.762101	0.446	0.999879	CTTN
ENSG00000085760	33.4175	-0.0924262	0.407983	-0.226544	0.820778	0.999879	MTIF2
ENSG00000085788	22.14	-0.399086	0.461278	-0.865175	0.386943	0.999879	DDHD2
ENSG00000085832	28.6477	0.0465492	0.414202	0.112383	0.91052	0.999879	EPS15
ENSG00000085840	41.5349	0.176016	0.372699	0.472275	0.636731	0.999879	ORC1
ENSG00000085871	95.4721	0.511139	0.274793	1.86009	0.0628732	0.999879	MGST2
ENSG00000085872	48.5877	-0.602337	0.370063	-1.62766	0.103597	0.999879	CHERP
ENSG00000085978	18.2454	0.45268	0.48581	0.931803	0.351438	0.999879	ATG16L1
ENSG00000085982	37.3441	-0.380396	0.372822	-1.02032	0.307578	0.999879	USP40
ENSG00000085998	50.9069	0.0985736	0.370046	0.266382	0.789945	0.999879	POMGNT1
ENSG00000085999	24.3676	-0.177133	0.454409	-0.389809	0.696678	0.999879	RAD54L
ENSG00000086015	42.2551	-0.909315	0.356385	-2.55149	0.0107263	0.999879	MAST2
ENSG00000086061	761.152	0.184872	0.21466	0.861232	0.38911	0.999879	DNAJA1
ENSG00000086062	391.438	-0.351131	0.237119	-1.48082	0.138654	0.999879	B4GALT1
ENSG00000086065	178.791	0.113893	0.298274	0.38184	0.70258	0.999879	CHMP5
ENSG00000086102	64.0491	-0.127932	0.306047	-0.418014	0.675937	0.999879	NFX1
ENSG00000086189	96.9463	-0.217795	0.283218	-0.769001	0.441893	0.999879	DIMT1
ENSG00000086200	55.0912	-0.305256	0.332987	-0.916719	0.35929	0.999879	IPO11
ENSG00000086232	192.836	0.0832622	0.235211	0.35399	0.723346	0.999879	EIF2AK1
ENSG00000086289	33.1869	-0.362729	0.400425	-0.905861	0.36501	0.999879	EPDR1
ENSG00000086475	95.6849	-0.190697	0.270948	-0.703814	0.481548	0.999879	SEPHS1
ENSG00000086504	192.282	0.156523	0.240712	0.65025	0.515531	0.999879	MRPL28
ENSG00000086544	8.55903	0.505521	0.670471	0.753979	0.450862	0.999879	ITPKC
ENSG00000086589	76.3523	0.0425423	0.293083	0.145154	0.884589	0.999879	RBM22
ENSG00000086598	279.464	0.0655666	0.247789	0.264606	0.791313	0.999879	TMED2
ENSG00000086666	58.1922	0.199064	0.365604	0.544479	0.586112	0.999879	ZFAND6
ENSG00000086712	33.9933	0.329298	0.390927	0.842353	0.399591	0.999879	TXLNG
ENSG00000086758	106.981	-0.454608	0.37594	-1.20925	0.226565	0.999879	HUWE1
ENSG00000086827	18.8577	0.197041	0.47728	0.412841	0.679723	0.999879	ZW10
ENSG00000086848	21.0636	0.172423	0.470906	0.366151	0.714252	0.999879	ALG9
ENSG00000087008	23.7584	-0.86232	0.543051	-1.58792	0.112305	0.999879	ACOX3
ENSG00000087053	122.194	0.0517354	0.253329	0.204222	0.83818	0.999879	MTMR2
ENSG00000087077	192.803	-0.226464	0.239074	-0.947252	0.34351	0.999879	TRIP6
ENSG00000087086	7731.72	0.182796	0.204509	0.893828	0.371414	0.999879	FTL
ENSG00000087087	132.703	0.161873	0.256027	0.632247	0.527225	0.999879	SRRT
ENSG00000087088	144.858	-0.164129	0.291432	-0.563182	0.573311	0.999879	BAX
ENSG00000087095	13.5274	-0.332753	0.562021	-0.592066	0.553806	0.999879	NLK
ENSG00000087111	86.1093	-0.170133	0.315574	-0.539124	0.589801	0.999879	PIGS
ENSG00000087152	42.457	-0.146077	0.349242	-0.418269	0.67575	0.999879	ATXN7L3
ENSG00000087157	25.5494	-0.109316	0.426806	-0.256127	0.797853	0.999879	PGS1
ENSG00000087191	384.297	-0.011482	0.210692	-0.0544967	0.956539	0.999879	PSMC5
ENSG00000087206	30.144	0.159964	0.401305	0.398611	0.69018	0.999879	UIMC1
ENSG00000087245	50.6499	-0.181891	0.36844	-0.493677	0.621534	0.999879	MMP2
ENSG00000087253	19.2859	-0.184581	0.496669	-0.371638	0.710162	0.999879	LPCAT2
ENSG00000087263	60.6811	0.00622751	0.30574	0.0203686	0.983749	0.999879	OGFOD1
ENSG00000087266	9.37987	-0.184223	0.657921	-0.280008	0.779472	0.999879	SH3BP2
ENSG00000087269	60.7486	0.108012	0.314931	0.34297	0.731621	0.999879	NOP14
ENSG00000087274	56.5144	0.12039	0.313735	0.383734	0.701176	0.999879	ADD1
ENSG00000087299	15.0063	-0.436683	0.527766	-0.827417	0.408001	0.999879	L2HGDH
ENSG00000087302	465.879	0.126349	0.201541	0.626914	0.530716	0.999879	RTRAF
ENSG00000087338	17.0779	-0.192633	0.505526	-0.381054	0.703163	0.999879	GMCL1
ENSG00000087365	215.35	-0.306868	0.224278	-1.36825	0.171234	0.999879	SF3B2
ENSG00000087448	17.0792	0.415403	0.517966	0.80199	0.422559	0.999879	KLHL42
ENSG00000087460	1583.64	0.0783604	0.194112	0.403687	0.686443	0.999879	GNAS
ENSG00000087470	82.6637	-0.00883255	0.298325	-0.0296071	0.97638	0.999879	DNM1L
ENSG00000087502	101.221	0.129643	0.319325	0.40599	0.68475	0.999879	ERGIC2
ENSG00000087586	155.524	0.0242004	0.254199	0.0952024	0.924154	0.999879	AURKA
ENSG00000087842	155.022	0.0850686	0.317915	0.267583	0.789021	0.999879	PIR
ENSG00000087884	21.0842	0.534787	0.456095	1.17253	0.240982	0.999879	AAMDC
ENSG00000087995	58.5557	0.453169	0.3238	1.39953	0.161654	0.999879	METTL2A
ENSG00000088035	19.1344	0.0150809	0.490753	0.0307302	0.975485	0.999879	ALG6
ENSG00000088038	40.0421	-0.0287207	0.387183	-0.0741785	0.940868	0.999879	CNOT3
ENSG00000088179	9.95969	0.567555	0.624453	0.908883	0.363412	0.999879	PTPN4
ENSG00000088205	81.8963	-0.0380726	0.313985	-0.121256	0.903488	0.999879	DDX18
ENSG00000088247	155.357	-0.158542	0.295705	-0.53615	0.591855	0.999879	KHSRP
ENSG00000088256	47.4236	-0.0144655	0.358391	-0.0403625	0.967804	0.999879	GNA11
ENSG00000088280	13.9085	0.281816	0.537982	0.523839	0.600391	0.999879	ASAP3
ENSG00000088298	32.7914	0.140743	0.41465	0.339425	0.73429	0.999879	EDEM2
ENSG00000088325	189.136	-0.0502778	0.238738	-0.210598	0.833201	0.999879	TPX2
ENSG00000088356	40.379	0.407987	0.373909	1.09114	0.275212	0.999879	PDRG1
ENSG00000088367	40.3865	-0.472575	0.399403	-1.1832	0.236729	0.999879	EPB41L1
ENSG00000088387	18.5988	-0.64787	0.510329	-1.26951	0.204258	0.999879	DOCK9
ENSG00000088448	49.6814	0.385731	0.339406	1.13649	0.255752	0.999879	ANKRD10
ENSG00000088451	9.42217	0.364643	0.661865	0.550933	0.58168	0.999879	TGDS
ENSG00000088682	87.8103	-0.314585	0.305928	-1.0283	0.30381	0.999879	COQ9
ENSG00000088727	28.3347	0.22485	0.409636	0.548902	0.583073	0.999879	KIF9
ENSG00000088766	47.9144	-0.016022	0.386808	-0.041421	0.96696	0.999879	CRLS1
ENSG00000088812	7.56392	-0.270037	0.7594	-0.355593	0.722145	0.999879	ATRN
ENSG00000088832	315.76	0.0783795	0.216309	0.362349	0.717091	0.999879	FKBP1A
ENSG00000088833	38.4346	0.384367	0.377481	1.01824	0.308562	0.999879	NSFL1C
ENSG00000088888	15.7308	-0.693284	0.565566	-1.22582	0.220265	0.999879	MAVS
ENSG00000088930	65.4386	-0.0474673	0.303975	-0.156155	0.875911	0.999879	XRN2
ENSG00000088970	12.9141	0.205431	0.589795	0.34831	0.727608	0.999879	KIZ
ENSG00000088986	698.879	0.104251	0.203668	0.51187	0.608742	0.999879	DYNLL1
ENSG00000088992	10.4897	0.487345	0.686657	0.709735	0.477868	0.999879	TESC
ENSG00000089006	58.3323	0.449704	0.314459	1.43009	0.152692	0.999879	SNX5
ENSG00000089009	2885.2	0.0832228	0.19579	0.425061	0.670792	0.999879	RPL6
ENSG00000089022	24.902	0.261517	0.45345	0.576727	0.564124	0.999879	MAPKAPK5
ENSG00000089048	9.85371	0.352704	0.634672	0.555726	0.578398	0.999879	ESF1
ENSG00000089050	8.20844	0.439058	0.723295	0.607025	0.543834	0.999879	RBBP9
ENSG00000089053	132.668	-0.0128097	0.294501	-0.0434962	0.965306	0.999879	ANAPC5
ENSG00000089057	6.81589	-0.149165	0.748245	-0.199353	0.841986	0.999879	SLC23A2
ENSG00000089060	7.05617	-0.659418	0.769767	-0.856647	0.39164	0.999879	SLC8B1
ENSG00000089063	56.3386	0.150925	0.314155	0.480416	0.630931	0.999879	TMEM230
ENSG00000089094	24.4244	0.108791	0.466007	0.233453	0.815409	0.999879	KDM2B
ENSG00000089123	7.5685	-0.380365	0.701487	-0.542227	0.587662	0.999879	TASP1
ENSG00000089154	88.7277	-0.0398474	0.306236	-0.13012	0.896472	0.999879	GCN1
ENSG00000089157	3889.47	0.178577	0.196947	0.906728	0.364551	0.999879	RPLP0
ENSG00000089159	74.3115	-0.386735	0.313475	-1.2337	0.217313	0.999879	PXN
ENSG00000089195	19.0308	-0.0480047	0.466956	-0.102803	0.918119	0.999879	TRMT6
ENSG00000089220	414.651	0.0341535	0.212405	0.160794	0.872255	0.999879	PEBP1
ENSG00000089234	19.3607	0.47787	0.488834	0.97757	0.328287	0.999879	BRAP
ENSG00000089248	218.981	0.230687	0.249034	0.926329	0.354275	0.999879	ERP29
ENSG00000089280	385.353	-0.263357	0.215497	-1.22209	0.221674	0.999879	FUS
ENSG00000089289	95.8512	-0.0194961	0.300921	-0.0647881	0.948343	0.999879	IGBP1
ENSG00000089327	124.061	0.126595	0.298808	0.423669	0.671807	0.999879	FXYD5
ENSG00000089335	14.034	-0.0844059	0.569926	-0.1481	0.882264	0.999879	ZNF302
ENSG00000089351	73.9331	-0.0527116	0.288974	-0.182409	0.855262	0.999879	GRAMD1A
ENSG00000089486	59.3119	-0.10084	0.340404	-0.296238	0.767049	0.999879	CDIP1
ENSG00000089597	509.074	0.0252481	0.205412	0.122915	0.902175	0.999879	GANAB
ENSG00000089639	10.7192	-0.028667	0.608738	-0.0470925	0.962439	0.999879	GMIP
ENSG00000089682	12.7601	-0.21553	0.562408	-0.383226	0.701552	0.999879	RBM41
ENSG00000089685	305.57	-0.0508446	0.235221	-0.216157	0.828865	0.999879	BIRC5
ENSG00000089693	237.405	-0.0602584	0.23531	-0.256081	0.797888	0.999879	MLF2
ENSG00000089737	116.914	-0.0909358	0.261173	-0.348182	0.727704	0.999879	DDX24
ENSG00000089775	7.55507	0.306509	0.704711	0.434943	0.663604	0.999879	ZBTB25
ENSG00000089818	30.8268	0.145727	0.415357	0.350848	0.725702	0.999879	NECAP1
ENSG00000089876	29.6717	-0.0969281	0.417875	-0.231955	0.816573	0.999879	DHX32
ENSG00000089902	21.803	-0.605229	0.482425	-1.25456	0.20964	0.999879	RCOR1
ENSG00000089916	12.4292	-0.56598	0.572948	-0.987839	0.323232	0.999879	GPATCH2L
ENSG00000090006	33.1866	-0.142566	0.402085	-0.354566	0.722915	0.999879	LTBP4
ENSG00000090013	86.5279	0.316394	0.296052	1.06871	0.285199	0.999879	BLVRB
ENSG00000090020	11.6807	-0.141194	0.713299	-0.197945	0.843088	0.999879	SLC9A1
ENSG00000090054	49.2091	-0.419248	0.330981	-1.26668	0.205269	0.999879	SPTLC1
ENSG00000090060	168.299	0.0939576	0.262696	0.357667	0.720593	0.999879	PAPOLA
ENSG00000090061	27.649	0.0991594	0.412637	0.240307	0.810092	0.999879	CCNK
ENSG00000090097	33.7169	0.102832	0.37843	0.271734	0.785826	0.999879	PCBP4
ENSG00000090238	14.781	0.207668	0.534225	0.388727	0.697478	0.999879	YPEL3
ENSG00000090263	26.6804	0.47791	0.411586	1.16114	0.245584	0.999879	MRPS33
ENSG00000090266	280.55	0.30658	0.266641	1.14978	0.250233	0.999879	NDUFB2
ENSG00000090273	420.057	-0.120924	0.224807	-0.537901	0.590645	0.999879	NUDC
ENSG00000090316	73.0065	0.11516	0.299281	0.384789	0.700394	0.999879	MAEA
ENSG00000090372	87.7818	0.00291488	0.310609	0.00938441	0.992512	0.999879	STRN4
ENSG00000090402	11.568	0.739901	0.678626	1.09029	0.275584	0.999879	SI
ENSG00000090432	48.6011	-0.173941	0.363587	-0.478404	0.632363	0.999879	MUL1
ENSG00000090447	31.3042	0.078538	0.496754	0.158102	0.874376	0.999879	TFAP4
ENSG00000090470	14.6129	0.458797	0.531601	0.863049	0.388111	0.999879	PDCD7
ENSG00000090487	122.294	0.00653691	0.254338	0.0257016	0.979495	0.999879	SPG21
ENSG00000090520	105.082	-0.0605383	0.257653	-0.234961	0.814239	0.999879	DNAJB11
ENSG00000090530	46.4714	-0.137847	0.343986	-0.400735	0.688615	0.999879	P3H2
ENSG00000090565	19.4162	0.0332247	0.467333	0.0710943	0.943323	0.999879	RAB11FIP3
ENSG00000090581	46.2219	0.30845	0.356588	0.865004	0.387037	0.999879	GNPTG
ENSG00000090612	6.91026	-0.142152	0.76343	-0.186201	0.852287	0.999879	ZNF268
ENSG00000090615	22.7787	-0.515271	0.500009	-1.03052	0.302764	0.999879	GOLGA3
ENSG00000090621	197.539	-0.0263664	0.288068	-0.0915283	0.927073	0.999879	PABPC4
ENSG00000090674	36.0232	-0.421531	0.380605	-1.10753	0.268065	0.999879	MCOLN1
ENSG00000090686	71.2069	-0.528503	0.317424	-1.66497	0.0959179	0.999879	USP48
ENSG00000090776	8.14882	-0.0287767	0.686088	-0.0419432	0.966544	0.999879	EFNB1
ENSG00000090857	11.5425	-0.662795	0.675418	-0.98131	0.32644	0.999879	PDPR
ENSG00000090861	110.933	-0.174355	0.282653	-0.616854	0.537331	0.999879	AARS
ENSG00000090863	67.9027	-0.166396	0.292189	-0.569482	0.569029	0.999879	GLG1
ENSG00000090889	50.9658	-0.566311	0.329092	-1.72083	0.0852824	0.999879	KIF4A
ENSG00000090905	21.7967	-0.439863	0.468188	-0.939502	0.347473	0.999879	TNRC6A
ENSG00000090924	12.8874	-0.312657	0.606051	-0.515892	0.60593	0.999879	PLEKHG2
ENSG00000090932	9.22213	0.0642611	0.644893	0.0996461	0.920625	0.999879	DLL3
ENSG00000090971	62.9803	0.193058	0.334856	0.57654	0.56425	0.999879	NAT14
ENSG00000090989	22.411	0.123316	0.433399	0.284532	0.776003	0.999879	EXOC1
ENSG00000091009	55.5138	0.106926	0.375706	0.2846	0.77595	0.999879	RBM27
ENSG00000091039	34.1914	-0.107138	0.412012	-0.260035	0.794837	0.999879	OSBPL8
ENSG00000091073	13.889	-0.060872	0.648882	-0.0938105	0.92526	0.999879	DTX2
ENSG00000091127	36.8937	-0.248528	0.362373	-0.685835	0.492817	0.999879	PUS7
ENSG00000091136	80.2876	-0.10621	0.320298	-0.331599	0.740192	0.999879	LAMB1
ENSG00000091140	122.409	-0.0369071	0.300301	-0.1229	0.902186	0.999879	DLD
ENSG00000091157	9.13738	-0.0678846	0.697723	-0.0972944	0.922493	0.999879	WDR7
ENSG00000091164	142.995	-0.0435326	0.270678	-0.160828	0.872229	0.999879	TXNL1
ENSG00000091317	40.7445	-0.0124326	0.347942	-0.0357318	0.971496	0.999879	CMTM6
ENSG00000091409	32.4521	-0.00204986	0.383168	-0.00534977	0.995732	0.999879	ITGA6
ENSG00000091436	63.3845	-0.433734	0.323934	-1.33896	0.180584	0.999879	MAP3K20
ENSG00000091483	188.284	-0.0734443	0.273431	-0.268602	0.788236	0.999879	FH
ENSG00000091490	53.5286	-0.00511193	0.335219	-0.0152495	0.987833	0.999879	SEL1L3
ENSG00000091527	123.247	-0.115074	0.255702	-0.450033	0.652687	0.999879	CDV3
ENSG00000091542	86.4743	-0.270027	0.312368	-0.864452	0.38734	0.999879	ALKBH5
ENSG00000091622	10.6954	-0.381111	0.618901	-0.615788	0.538035	0.999879	PITPNM3
ENSG00000091640	80.6345	-0.0152026	0.27857	-0.0545735	0.956478	0.999879	SPAG7
ENSG00000091651	33.9391	0.279421	0.394837	0.707686	0.47914	0.999879	ORC6
ENSG00000091732	41.2005	-0.0787097	0.349343	-0.225308	0.82174	0.999879	ZC3HC1
ENSG00000091947	53.8784	0.0628352	0.334631	0.187775	0.851053	0.999879	TMEM101
ENSG00000091986	29.4519	0.229142	0.443967	0.516125	0.605767	0.999879	CCDC80
ENSG00000092010	138.899	0.0517243	0.247179	0.209258	0.834247	0.999879	PSME1
ENSG00000092020	29.2916	0.0202358	0.43961	0.0460313	0.963285	0.999879	PPP2R3C
ENSG00000092036	53.8729	0.224972	0.34058	0.660556	0.508897	0.999879	HAUS4
ENSG00000092094	40.8616	0.284256	0.355632	0.799297	0.424118	0.999879	OSGEP
ENSG00000092098	23.3965	-0.401002	0.448105	-0.894884	0.370849	0.999879	RNF31
ENSG00000092108	54.7553	0.246593	0.326911	0.754312	0.450662	0.999879	SCFD1
ENSG00000092140	27.3326	0.212957	0.433823	0.490884	0.623508	0.999879	G2E3
ENSG00000092148	42.8729	-0.116848	0.374598	-0.311929	0.755094	0.999879	HECTD1
ENSG00000092199	1006.46	-0.0136774	0.232613	-0.0587992	0.953112	0.999879	HNRNPC
ENSG00000092201	130.619	-0.261096	0.283224	-0.921872	0.356596	0.999879	SUPT16H
ENSG00000092203	54.006	0.180985	0.317867	0.569373	0.569103	0.999879	TOX4
ENSG00000092208	22.0333	0.667382	0.47011	1.41963	0.155716	0.999879	GEMIN2
ENSG00000092330	27.9863	-0.0845017	0.415802	-0.203226	0.838959	0.999879	TINF2
ENSG00000092439	23.2959	0.0776732	0.43963	0.176679	0.859761	0.999879	TRPM7
ENSG00000092445	52.2034	0.205831	0.333134	0.61786	0.536667	0.999879	TYRO3
ENSG00000092470	37.1549	-0.413791	0.411259	-1.00616	0.31434	0.999879	WDR76
ENSG00000092531	39.6107	-0.185881	0.390419	-0.476106	0.633999	0.999879	SNAP23
ENSG00000092621	477.721	0.12441	0.21255	0.585323	0.55833	0.999879	PHGDH
ENSG00000092820	299.45	-0.322558	0.245441	-1.3142	0.18878	0.999879	EZR
ENSG00000092841	2060.06	0.220044	0.316488	0.695268	0.486887	0.999879	MYL6
ENSG00000092847	20.0932	-0.0363699	0.501952	-0.0724569	0.942238	0.999879	AGO1
ENSG00000092853	11.5045	-0.839455	0.621238	-1.35126	0.176612	0.999879	CLSPN
ENSG00000092871	10.3404	-0.177594	0.68375	-0.259735	0.795068	0.999879	RFFL
ENSG00000092929	96.044	-0.063462	0.296398	-0.214111	0.830461	0.999879	UNC13D
ENSG00000092931	19.324	-0.549385	0.465081	-1.18127	0.237496	0.999879	MFSD11
ENSG00000092964	59.0783	0.00648889	0.40345	0.0160835	0.987168	0.999879	DPYSL2
ENSG00000092969	11.2079	-0.0756503	0.698032	-0.108377	0.913697	0.999879	TGFB2
ENSG00000092978	13.7626	0.366405	0.550552	0.665524	0.505715	0.999879	GPATCH2
ENSG00000093000	64.4665	-0.320599	0.302338	-1.0604	0.288963	0.999879	NUP50
ENSG00000093009	52.9238	0.243152	0.320806	0.757942	0.448486	0.999879	CDC45
ENSG00000093010	142.314	0.113817	0.244748	0.465039	0.641903	0.999879	COMT
ENSG00000093144	99.2193	0.0881452	0.295136	0.298659	0.7652	0.999879	ECHDC1
ENSG00000093167	44.0846	0.118933	0.362681	0.327927	0.742967	0.999879	LRRFIP2
ENSG00000093183	43.03	-0.341594	0.352344	-0.96949	0.332301	0.999879	SEC22C
ENSG00000094631	21.2532	-0.0797124	0.46908	-0.169934	0.865062	0.999879	HDAC6
ENSG00000094804	100.061	0.0306127	0.263783	0.116053	0.907611	0.999879	CDC6
ENSG00000094841	14.3773	-0.132579	0.547995	-0.241935	0.808831	0.999879	UPRT
ENSG00000094880	61.6845	-0.140429	0.315324	-0.445348	0.656068	0.999879	CDC23
ENSG00000094914	66.1667	0.0649242	0.298677	0.217373	0.827918	0.999879	AAAS
ENSG00000094916	148.848	-0.345793	0.287517	-1.20269	0.229098	0.999879	CBX5
ENSG00000094975	11.4117	-0.298423	0.603885	-0.494172	0.621185	0.999879	SUCO
ENSG00000095002	49.3325	-0.192306	0.334889	-0.574238	0.565807	0.999879	MSH2
ENSG00000095015	8.09604	-0.30662	0.722521	-0.424375	0.671292	0.999879	MAP3K1
ENSG00000095059	85.3043	0.197158	0.274834	0.717372	0.473145	0.999879	DHPS
ENSG00000095066	9.09978	0.15393	0.683285	0.225279	0.821762	0.999879	HOOK2
ENSG00000095139	69.4286	-0.254622	0.298128	-0.854069	0.393067	0.999879	ARCN1
ENSG00000095209	33.1092	0.12717	0.386198	0.329287	0.741939	0.999879	TMEM38B
ENSG00000095261	86.7479	-0.276787	0.271967	-1.01772	0.308811	0.999879	PSMD5
ENSG00000095319	133.171	-0.289649	0.264123	-1.09665	0.272796	0.999879	NUP188
ENSG00000095321	29.5518	0.10832	0.399202	0.271341	0.786128	0.999879	CRAT
ENSG00000095380	136.19	-0.0273095	0.256105	-0.106634	0.915079	0.999879	NANS
ENSG00000095383	38.0681	-0.104688	0.420781	-0.248794	0.80352	0.999879	TBC1D2
ENSG00000095397	24.255	-0.0187927	0.448751	-0.0418777	0.966596	0.999879	WHRN
ENSG00000095485	20.2788	-0.00553761	0.456668	-0.0121261	0.990325	0.999879	CWF19L1
ENSG00000095564	21.9363	0.563349	0.455484	1.23681	0.216156	0.999879	BTAF1
ENSG00000095574	18.4944	-0.185448	0.487621	-0.380311	0.703715	0.999879	IKZF5
ENSG00000095739	14.6338	-0.105923	0.590557	-0.17936	0.857655	0.999879	BAMBI
ENSG00000095752	22.8062	-0.124878	0.520825	-0.23977	0.810509	0.999879	IL11
ENSG00000095787	88.5394	0.18445	0.288515	0.639308	0.522623	0.999879	WAC
ENSG00000095794	33.8441	0.0562365	0.437701	0.128482	0.897768	0.999879	CREM
ENSG00000095906	189.545	0.12573	0.238658	0.526822	0.598317	0.999879	NUBP2
ENSG00000095951	8.94965	-0.0499128	0.686095	-0.0727491	0.942006	0.999879	HIVEP1
ENSG00000096060	21.778	-0.513857	0.45154	-1.13801	0.255116	0.999879	FKBP5
ENSG00000096063	72.126	0.205165	0.301401	0.680705	0.496058	0.999879	SRPK1
ENSG00000096070	11.1546	-0.280585	0.624404	-0.449365	0.653169	0.999879	BRPF3
ENSG00000096080	81.8496	0.291079	0.284576	1.02285	0.306378	0.999879	MRPS18A
ENSG00000096092	92.6001	0.0513664	0.307928	0.166813	0.867517	0.999879	TMEM14A
ENSG00000096093	11.7867	-0.139589	0.597339	-0.233685	0.81523	0.999879	EFHC1
ENSG00000096384	1465.92	0.0671156	0.193696	0.3465	0.728967	0.999879	HSP90AB1
ENSG00000096401	54.3425	-0.0294557	0.329209	-0.0894741	0.928705	0.999879	CDC5L
ENSG00000096433	60.2332	0.319878	0.345388	0.926141	0.354372	0.999879	ITPR3
ENSG00000096654	10.1141	0.894312	0.67672	1.32154	0.186322	0.999879	ZNF184
ENSG00000096696	21.0058	-0.703207	0.505083	-1.39226	0.163844	0.999879	DSP
ENSG00000096717	19.9378	-0.122598	0.472796	-0.259305	0.7954	0.999879	SIRT1
ENSG00000096746	158.916	-0.563422	0.236556	-2.38177	0.0172295	0.999879	HNRNPH3
ENSG00000097007	96.5424	-0.379722	0.278477	-1.36356	0.172705	0.999879	ABL1
ENSG00000097021	140.257	0.00907369	0.241723	0.0375376	0.970056	0.999879	ACOT7
ENSG00000097033	66.8702	-0.0128544	0.326284	-0.0393964	0.968574	0.999879	SH3GLB1
ENSG00000097046	28.3822	-0.103427	0.42742	-0.241981	0.808795	0.999879	CDC7
ENSG00000099194	499.349	-0.136077	0.254917	-0.53381	0.593473	0.999879	SCD
ENSG00000099203	65.0259	0.0554989	0.315689	0.175802	0.860449	0.999879	TMED1
ENSG00000099204	84.6288	-0.0819856	0.286403	-0.28626	0.774679	0.999879	ABLIM1
ENSG00000099219	32.3417	-0.444718	0.394089	-1.12847	0.259122	0.999879	ERMP1
ENSG00000099246	73.6	-0.0347062	0.292304	-0.118733	0.905487	0.999879	RAB18
ENSG00000099250	27.1741	0.222048	0.414738	0.535392	0.592379	0.999879	NRP1
ENSG00000099260	27.5632	-0.00083401	0.409777	-0.00203528	0.998376	0.999879	PALMD
ENSG00000099290	21.4432	-0.336351	0.446322	-0.753607	0.451085	0.999879	WASHC2A
ENSG00000099326	15.9845	-0.688316	0.514008	-1.33912	0.180533	0.999879	MZF1
ENSG00000099330	16.9224	-0.369129	0.48731	-0.757483	0.44876	0.999879	OCEL1
ENSG00000099331	25.8082	-0.277305	0.415502	-0.667397	0.504519	0.999879	MYO9B
ENSG00000099341	383.236	0.0928855	0.204081	0.455141	0.649008	0.999879	PSMD8
ENSG00000099364	43.3253	-0.24618	0.364382	-0.67561	0.499288	0.999879	FBXL19
ENSG00000099377	13.0919	-0.333526	0.60593	-0.550437	0.582019	0.999879	HSD3B7
ENSG00000099381	21.4021	-0.763995	0.490702	-1.55694	0.119484	0.999879	SETD1A
ENSG00000099385	92.3238	-0.134164	0.309989	-0.432802	0.665159	0.999879	BCL7C
ENSG00000099622	60.028	-0.284796	0.314343	-0.906004	0.364934	0.999879	CIRBP
ENSG00000099624	502.395	-0.0249769	0.224201	-0.111404	0.911296	0.999879	ATP5D
ENSG00000099783	332.054	-0.246935	0.208535	-1.18414	0.236356	0.999879	HNRNPM
ENSG00000099795	402.111	0.253752	0.340916	0.744325	0.45668	0.999879	NDUFB7
ENSG00000099797	416.656	0.210531	0.273604	0.769475	0.441611	0.999879	TECR
ENSG00000099800	260.098	0.219547	0.229714	0.955742	0.339202	0.999879	TIMM13
ENSG00000099804	104.419	-0.0294995	0.281435	-0.104818	0.91652	0.999879	CDC34
ENSG00000099810	94.176	-0.134072	0.269865	-0.496811	0.619322	0.999879	MTAP
ENSG00000099812	97.7956	-0.199757	0.279645	-0.714324	0.475027	0.999879	MISP
ENSG00000099814	17.1457	-0.0563343	0.488394	-0.115346	0.908171	0.999879	CEP170B
ENSG00000099817	352.312	0.128109	0.213229	0.600805	0.54797	0.999879	POLR2E
ENSG00000099821	89.308	-0.112211	0.27406	-0.409438	0.682218	0.999879	POLRMT
ENSG00000099822	79.5753	-0.0804536	0.352824	-0.228027	0.819625	0.999879	HCN2
ENSG00000099849	18.4762	0.46263	0.500958	0.92349	0.355752	0.999879	RASSF7
ENSG00000099860	100.533	0.976122	0.902526	1.08154	0.279455	0.999879	GADD45B
ENSG00000099864	49.5562	-0.243798	0.34379	-0.709149	0.478232	0.999879	PALM
ENSG00000099875	103.583	0.00638994	0.274438	0.0232837	0.981424	0.999879	MKNK2
ENSG00000099899	45.7639	-0.024145	0.332018	-0.0727219	0.942027	0.999879	TRMT2A
ENSG00000099901	453.329	0.204451	0.205994	0.99251	0.320949	0.999879	RANBP1
ENSG00000099904	16.1105	-0.281636	0.528469	-0.532928	0.594083	0.999879	ZDHHC8
ENSG00000099917	41.034	-0.200446	0.388919	-0.515394	0.606278	0.999879	MED15
ENSG00000099940	42.1315	-0.0359088	0.3455	-0.103933	0.917223	0.999879	SNAP29
ENSG00000099942	24.836	-0.250383	0.447654	-0.559322	0.575942	0.999879	CRKL
ENSG00000099949	20.6432	0.480578	0.457899	1.04953	0.293935	0.999879	LZTR1
ENSG00000099956	83.286	0.222899	0.285964	0.779466	0.435705	0.999879	SMARCB1
ENSG00000099958	10.9802	-0.0417208	0.647103	-0.0644733	0.948593	0.999879	DERL3
ENSG00000099968	43.8899	-0.139476	0.361767	-0.385541	0.699837	0.999879	BCL2L13
ENSG00000099977	290.301	0.179603	0.271738	0.660943	0.508649	0.999879	DDT
ENSG00000099991	23.5379	-0.14565	0.444632	-0.327574	0.743234	0.999879	CABIN1
ENSG00000099992	8.45526	-0.270696	0.679141	-0.398586	0.690198	0.999879	TBC1D10A
ENSG00000099995	124.508	-0.0704617	0.303157	-0.232427	0.816207	0.999879	SF3A1
ENSG00000100014	13.7748	-0.447248	0.544039	-0.822088	0.411027	0.999879	SPECC1L
ENSG00000100023	22.7963	-0.456155	0.473597	-0.963172	0.335461	0.999879	PPIL2
ENSG00000100028	310.112	0.215962	0.256564	0.841748	0.399929	0.999879	SNRPD3
ENSG00000100029	137.248	-0.17776	0.273555	-0.649815	0.515812	0.999879	PES1
ENSG00000100030	76.7723	-0.274764	0.285054	-0.963903	0.335094	0.999879	MAPK1
ENSG00000100031	19.2956	0.440125	0.468625	0.939184	0.347636	0.999879	GGT1
ENSG00000100034	15.1154	-0.380873	0.529746	-0.718972	0.472158	0.999879	PPM1F
ENSG00000100036	8.59053	0.0560553	0.68587	0.0817287	0.934862	0.999879	SLC35E4
ENSG00000100038	13.4547	0.755232	0.556864	1.35622	0.175028	0.999879	TOP3B
ENSG00000100056	23.9574	0.081785	0.445177	0.183714	0.854238	0.999879	ESS2
ENSG00000100065	39.74	0.306025	0.416544	0.734677	0.462536	0.999879	CARD10
ENSG00000100075	189.323	0.0856621	0.249466	0.343382	0.731311	0.999879	SLC25A1
ENSG00000100083	24.4549	-0.442192	0.418676	-1.05617	0.290892	0.999879	GGA1
ENSG00000100084	29.8963	-0.102672	0.398034	-0.257947	0.796448	0.999879	HIRA
ENSG00000100097	1574.78	0.201928	0.241784	0.835161	0.403627	0.999879	LGALS1
ENSG00000100099	11.6255	-0.486842	0.606842	-0.802254	0.422406	0.999879	HPS4
ENSG00000100104	27.1085	-0.211421	0.414108	-0.510546	0.609669	0.999879	SRRD
ENSG00000100105	29.626	-0.189008	0.390331	-0.484227	0.628225	0.999879	PATZ1
ENSG00000100106	36.3385	-0.548565	0.401662	-1.36574	0.172021	0.999879	TRIOBP
ENSG00000100109	25.7122	-0.258777	0.42229	-0.612795	0.540012	0.999879	TFIP11
ENSG00000100116	25.5606	-0.023814	0.461021	-0.0516549	0.958804	0.999879	GCAT
ENSG00000100124	30.0567	0.153457	0.417907	0.367203	0.713468	0.999879	ANKRD54
ENSG00000100129	564.715	0.0258279	0.230629	0.111989	0.910832	0.999879	EIF3L
ENSG00000100138	485.946	0.0895062	0.218958	0.408782	0.6827	0.999879	SNU13
ENSG00000100139	32.8612	-0.459415	0.454872	-1.00999	0.312501	0.999879	MICALL1
ENSG00000100142	161.319	0.304949	0.250067	1.21947	0.222666	0.999879	POLR2F
ENSG00000100151	30.5849	-0.0817968	0.400894	-0.204036	0.838325	0.999879	PICK1
ENSG00000100154	8.92247	-1.33669	0.724213	-1.84572	0.0649336	0.999879	TTC28
ENSG00000100162	128.165	0.0477892	0.26147	0.182771	0.854977	0.999879	CENPM
ENSG00000100196	29.0117	0.375602	0.41154	0.912674	0.361414	0.999879	KDELR3
ENSG00000100201	169.869	-0.0359707	0.304757	-0.118031	0.906043	0.999879	DDX17
ENSG00000100207	17.936	-0.295586	0.514905	-0.57406	0.565927	0.999879	TCF20
ENSG00000100209	24.412	-0.0128369	0.434145	-0.0295682	0.976411	0.999879	HSCB
ENSG00000100211	19.8424	0.20964	0.465786	0.450077	0.652655	0.999879	CBY1
ENSG00000100216	192.976	0.049701	0.251364	0.197726	0.84326	0.999879	TOMM22
ENSG00000100219	126.649	-0.040297	0.281481	-0.143161	0.886163	0.999879	XBP1
ENSG00000100220	113.156	0.0755077	0.261661	0.288571	0.77291	0.999879	RTCB
ENSG00000100221	49.4042	-0.0589021	0.335453	-0.17559	0.860616	0.999879	JOSD1
ENSG00000100225	107.016	0.0184044	0.296197	0.0621357	0.950455	0.999879	FBXO7
ENSG00000100226	27.8577	-0.134836	0.425944	-0.316559	0.751578	0.999879	GTPBP1
ENSG00000100227	78.9604	0.259198	0.301944	0.858432	0.390654	0.999879	POLDIP3
ENSG00000100234	53.4725	-0.349324	0.344001	-1.01547	0.30988	0.999879	TIMP3
ENSG00000100239	36.4431	-0.135694	0.372003	-0.364765	0.715287	0.999879	PPP6R2
ENSG00000100241	78.3015	-0.0434888	0.287203	-0.151422	0.879643	0.999879	SBF1
ENSG00000100242	74.955	-0.220148	0.385578	-0.570956	0.56803	0.999879	SUN2
ENSG00000100243	197.642	-0.00127106	0.275847	-0.00460784	0.996323	0.999879	CYB5R3
ENSG00000100246	7.09468	0.707198	0.753418	0.938654	0.347909	0.999879	DNAL4
ENSG00000100258	95.5696	0.325173	0.27992	1.16166	0.245373	0.999879	LMF2
ENSG00000100263	14.4881	0.218993	0.524433	0.417582	0.676253	0.999879	RHBDD3
ENSG00000100266	46.0854	-0.330716	0.356673	-0.927225	0.35381	0.999879	PACSIN2
ENSG00000100280	85.4861	0.244868	0.293793	0.833472	0.404578	0.999879	AP1B1
ENSG00000100281	16.1059	-0.484497	0.559527	-0.865903	0.386543	0.999879	HMGXB4
ENSG00000100284	30.1841	-0.0381197	0.428122	-0.0890394	0.929051	0.999879	TOM1
ENSG00000100285	59.3441	-0.327273	0.401145	-0.815847	0.414587	0.999879	NEFH
ENSG00000100288	15.1128	0.00088819	0.593121	0.00149748	0.998805	0.999879	CHKB
ENSG00000100292	194.9	0.585491	0.317163	1.84603	0.0648882	0.999879	HMOX1
ENSG00000100294	62.3575	-0.037603	0.338096	-0.11122	0.911442	0.999879	MCAT
ENSG00000100296	73.9488	-0.0294549	0.309598	-0.0951393	0.924204	0.999879	THOC5
ENSG00000100297	210.173	0.0135852	0.254819	0.0533131	0.957482	0.999879	MCM5
ENSG00000100299	16.9907	-0.477511	0.500937	-0.953235	0.340471	0.999879	ARSA
ENSG00000100300	384.642	0.21999	0.223381	0.984823	0.324711	0.999879	TSPO
ENSG00000100304	149.889	-0.0806266	0.237093	-0.340064	0.733809	0.999879	TTLL12
ENSG00000100316	2954.52	0.129789	0.191484	0.677805	0.497896	0.999879	RPL3
ENSG00000100319	26.9899	0.330205	0.411519	0.802404	0.422319	0.999879	ZMAT5
ENSG00000100320	50.2251	-0.369632	0.321816	-1.14858	0.250729	0.999879	RBFOX2
ENSG00000100324	23.5672	-0.562141	0.46293	-1.21431	0.224628	0.999879	TAB1
ENSG00000100325	42.1608	0.178297	0.360958	0.493955	0.621338	0.999879	ASCC2
ENSG00000100330	10.9213	-1.08743	0.663224	-1.63962	0.101085	0.999879	MTMR3
ENSG00000100335	46.4056	-0.276747	0.346566	-0.798542	0.424556	0.999879	MIEF1
ENSG00000100345	445.878	-0.517287	0.591646	-0.874317	0.381946	0.999879	MYH9
ENSG00000100347	151.832	-0.168788	0.263862	-0.639683	0.522378	0.999879	SAMM50
ENSG00000100348	130.206	0.266602	0.253063	1.0535	0.292111	0.999879	TXN2
ENSG00000100350	30.0767	-0.480665	0.442166	-1.08707	0.277006	0.999879	FOXRED2
ENSG00000100353	260.737	0.188643	0.231335	0.815456	0.414811	0.999879	EIF3D
ENSG00000100354	12.3474	-1.15168	0.646945	-1.78018	0.0750472	0.999879	TNRC6B
ENSG00000100359	50.5435	-0.153652	0.341622	-0.449772	0.652875	0.999879	SGSM3
ENSG00000100360	9.90501	0.118204	0.628023	0.188216	0.850707	0.999879	IFT27
ENSG00000100364	145.307	-0.0231222	0.262651	-0.0880342	0.929849	0.999879	KIAA0930
ENSG00000100372	59.5952	0.363498	0.304643	1.19319	0.232794	0.999879	SLC25A17
ENSG00000100376	12.9259	-0.610575	0.572003	-1.06743	0.285776	0.999879	FAM118A
ENSG00000100379	14.2785	-0.0986127	0.554018	-0.177996	0.858726	0.999879	KCTD17
ENSG00000100380	473.385	0.0691795	0.218635	0.316416	0.751687	0.999879	ST13
ENSG00000100387	268.916	0.352325	0.240049	1.46772	0.142181	0.999879	RBX1
ENSG00000100393	23.6579	-0.680664	0.581693	-1.17014	0.241943	0.999879	EP300
ENSG00000100395	53.5611	0.166572	0.329548	0.505457	0.613238	0.999879	L3MBTL2
ENSG00000100401	177.918	0.0166011	0.28435	0.0583828	0.953444	0.999879	RANGAP1
ENSG00000100403	52.7557	-0.574188	0.324124	-1.77151	0.0764762	0.999879	ZC3H7B
ENSG00000100410	164.401	0.0951777	0.251503	0.378435	0.705108	0.999879	PHF5A
ENSG00000100412	164.861	0.0960413	0.24526	0.391589	0.695362	0.999879	ACO2
ENSG00000100413	124.618	0.0488222	0.24655	0.198021	0.843029	0.999879	POLR3H
ENSG00000100416	48.0491	-0.0212283	0.3526	-0.0602051	0.951992	0.999879	TRMU
ENSG00000100417	44.9318	0.449287	0.361859	1.24161	0.214382	0.999879	PMM1
ENSG00000100418	121.375	-0.0126174	0.254457	-0.0495856	0.960453	0.999879	DESI1
ENSG00000100422	70.2009	-0.60948	0.293396	-2.07733	0.0377711	0.999879	CERK
ENSG00000100425	13.0012	0.290969	0.592775	0.490858	0.623527	0.999879	BRD1
ENSG00000100426	17.9252	-0.539529	0.501861	-1.07506	0.282349	0.999879	ZBED4
ENSG00000100429	13.708	-0.0917263	0.561102	-0.163475	0.870144	0.999879	HDAC10
ENSG00000100439	47.1851	-0.0765653	0.407291	-0.187987	0.850887	0.999879	ABHD4
ENSG00000100441	31.8456	-0.0522501	0.40924	-0.127676	0.898405	0.999879	KHNYN
ENSG00000100442	168.93	0.26283	0.269176	0.976425	0.328854	0.999879	FKBP3
ENSG00000100445	46.6407	0.0342506	0.340135	0.100697	0.919791	0.999879	SDR39U1
ENSG00000100461	71.9085	0.14372	0.316759	0.453719	0.650031	0.999879	RBM23
ENSG00000100462	140.159	0.197984	0.266835	0.741972	0.458104	0.999879	PRMT5
ENSG00000100473	11.1937	0.215577	0.604151	0.356826	0.721222	0.999879	COCH
ENSG00000100479	27.0025	0.475728	0.416451	1.14234	0.253313	0.999879	POLE2
ENSG00000100483	11.9068	0.863738	0.623506	1.38529	0.165963	0.999879	VCPKMT
ENSG00000100485	8.70461	-0.0296681	0.662435	-0.0447864	0.964278	0.999879	SOS2
ENSG00000100503	13.9908	-0.369668	0.56513	-0.654129	0.513029	0.999879	NIN
ENSG00000100504	116.617	-0.129545	0.262321	-0.493842	0.621418	0.999879	PYGL
ENSG00000100519	158.34	0.105617	0.271741	0.388666	0.697523	0.999879	PSMC6
ENSG00000100522	85.2555	0.0706467	0.309968	0.227916	0.819711	0.999879	GNPNAT1
ENSG00000100523	12.9484	0.081188	0.553431	0.146699	0.883369	0.999879	DDHD1
ENSG00000100526	111.595	0.387238	0.262225	1.47674	0.139745	0.999879	CDKN3
ENSG00000100528	204.059	0.140901	0.235211	0.599038	0.549147	0.999879	CNIH1
ENSG00000100532	12.8198	0.285843	0.567734	0.50348	0.614627	0.999879	CGRRF1
ENSG00000100554	67.3089	-0.0595267	0.308178	-0.193157	0.846836	0.999879	ATP6V1D
ENSG00000100558	20.8033	0.00436934	0.539953	0.00809208	0.993544	0.999879	PLEK2
ENSG00000100564	22.9248	0.234025	0.477385	0.490224	0.623976	0.999879	PIGH
ENSG00000100567	187.268	0.205443	0.237184	0.866173	0.386395	0.999879	PSMA3
ENSG00000100568	82.2999	0.223025	0.284753	0.783223	0.433496	0.999879	VTI1B
ENSG00000100575	58.2156	0.353958	0.318525	1.11124	0.266466	0.999879	TIMM9
ENSG00000100577	20.0882	0.796062	0.473425	1.6815	0.0926666	0.999879	GSTZ1
ENSG00000100578	7.91597	0.287467	0.694993	0.413626	0.679148	0.999879	KIAA0586
ENSG00000100580	14.7724	-0.635122	0.574978	-1.1046	0.269332	0.999879	TMED8
ENSG00000100591	197.043	-0.00271267	0.226097	-0.0119978	0.990427	0.999879	AHSA1
ENSG00000100592	26.039	-0.419099	0.473924	-0.884317	0.376525	0.999879	DAAM1
ENSG00000100596	21.9349	0.242818	0.4657	0.521404	0.602085	0.999879	SPTLC2
ENSG00000100600	51.87	-0.0119855	0.327497	-0.0365972	0.970806	0.999879	LGMN
ENSG00000100601	16.5754	0.0196807	0.500867	0.0392933	0.968657	0.999879	ALKBH1
ENSG00000100603	73.2825	0.0746001	0.298489	0.249925	0.802645	0.999879	SNW1
ENSG00000100605	42.9677	-0.256413	0.36282	-0.706723	0.479739	0.999879	ITPK1
ENSG00000100612	56.5507	0.0559573	0.346277	0.161597	0.871623	0.999879	DHRS7
ENSG00000100614	31.6725	0.00224239	0.382099	0.00586862	0.995318	0.999879	PPM1A
ENSG00000100625	7.84356	1.21045	0.72479	1.67007	0.0949049	0.999879	SIX4
ENSG00000100632	433.423	0.0948489	0.20436	0.464126	0.642558	0.999879	ERH
ENSG00000100644	215.546	-0.00614146	0.262275	-0.0234161	0.981318	0.999879	HIF1A
ENSG00000100650	175.946	-0.0309872	0.230556	-0.134402	0.893085	0.999879	SRSF5
ENSG00000100664	186.301	0.179291	0.243537	0.736195	0.461612	0.999879	EIF5
ENSG00000100697	12.8228	-0.469719	0.592868	-0.792281	0.428197	0.999879	DICER1
ENSG00000100711	24.2621	-0.675253	0.428165	-1.57709	0.114776	0.999879	ZFYVE21
ENSG00000100714	222.354	-0.250124	0.223471	-1.11927	0.263025	0.999879	MTHFD1
ENSG00000100722	51.1745	0.130159	0.337047	0.386174	0.699368	0.999879	ZC3H14
ENSG00000100726	41.2639	0.162331	0.364221	0.445695	0.655818	0.999879	TELO2
ENSG00000100731	11.832	-0.600446	0.621397	-0.966284	0.333902	0.999879	PCNX1
ENSG00000100744	31.1067	0.192424	0.405759	0.474233	0.635334	0.999879	GSKIP
ENSG00000100749	32.8898	0.462411	0.386979	1.19492	0.232116	0.999879	VRK1
ENSG00000100764	186.008	-0.0541011	0.280878	-0.192614	0.847261	0.999879	PSMC1
ENSG00000100784	15.865	-0.230124	0.556245	-0.41371	0.679087	0.999879	RPS6KA5
ENSG00000100796	44.4951	-0.238204	0.334049	-0.713082	0.475795	0.999879	PPP4R3A
ENSG00000100802	8.81442	0.243716	0.711546	0.342516	0.731963	0.999879	C14orf93
ENSG00000100804	378.428	0.0933085	0.216139	0.431706	0.665955	0.999879	PSMB5
ENSG00000100811	137.639	-0.284073	0.261468	-1.08646	0.277277	0.999879	YY1
ENSG00000100813	83.0645	-0.0958103	0.289037	-0.331481	0.740281	0.999879	ACIN1
ENSG00000100814	47.997	0.37817	0.362419	1.04346	0.296735	0.999879	CCNB1IP1
ENSG00000100815	14.6591	0.238691	0.602678	0.396051	0.692068	0.999879	TRIP11
ENSG00000100823	271.938	0.150547	0.2578	0.583971	0.55924	0.999879	APEX1
ENSG00000100836	148.751	-0.161643	0.305991	-0.52826	0.597319	0.999879	PABPN1
ENSG00000100852	29.3795	-0.209173	0.391497	-0.534289	0.593141	0.999879	ARHGAP5
ENSG00000100865	61.5348	0.0649676	0.335513	0.193636	0.846461	0.999879	CINP
ENSG00000100883	58.3836	-0.1648	0.321279	-0.512949	0.607987	0.999879	SRP54
ENSG00000100888	25.1367	-0.466436	0.436482	-1.06863	0.285238	0.999879	CHD8
ENSG00000100889	20.747	-0.165454	0.46065	-0.359176	0.719463	0.999879	PCK2
ENSG00000100890	46.3	0.0627906	0.378163	0.166041	0.868125	0.999879	KIAA0391
ENSG00000100897	47.2284	-0.313262	0.355688	-0.880721	0.378469	0.999879	DCAF11
ENSG00000100902	366.749	0.0207077	0.233995	0.0884967	0.929482	0.999879	PSMA6
ENSG00000100906	109.383	-1.4597	0.684067	-2.13386	0.0328544	0.999879	NFKBIA
ENSG00000100908	41.2579	0.0546944	0.352219	0.155285	0.876596	0.999879	EMC9
ENSG00000100911	173.397	0.204682	0.254085	0.805563	0.420495	0.999879	PSME2
ENSG00000100916	12.2689	-0.0255939	0.657449	-0.038929	0.968947	0.999879	BRMS1L
ENSG00000100926	61.481	0.176611	0.314243	0.562022	0.574101	0.999879	TM9SF1
ENSG00000100934	87.4754	-0.170682	0.278437	-0.613	0.539876	0.999879	SEC23A
ENSG00000100938	42.5133	-0.0365942	0.366794	-0.0997677	0.920529	0.999879	GMPR2
ENSG00000100941	61.4306	-0.198147	0.314107	-0.630828	0.528153	0.999879	PNN
ENSG00000100949	24.6554	0.274431	0.424636	0.646274	0.518102	0.999879	RABGGTA
ENSG00000100968	23.4393	0.408244	0.438343	0.931335	0.35168	0.999879	NFATC4
ENSG00000100979	10.7567	-0.40867	0.596876	-0.684681	0.493545	0.999879	PLTP
ENSG00000100982	46.3029	-0.105681	0.361553	-0.292297	0.770059	0.999879	PCIF1
ENSG00000100983	73.757	0.0532978	0.283349	0.188099	0.850799	0.999879	GSS
ENSG00000100991	83.0688	-0.213848	0.281334	-0.760121	0.447182	0.999879	TRPC4AP
ENSG00000100994	32.3135	0.179861	0.387036	0.464713	0.642137	0.999879	PYGB
ENSG00000100997	53.5698	0.00447266	0.315232	0.0141884	0.98868	0.999879	ABHD12
ENSG00000101000	57.2524	-0.0551173	0.400514	-0.137616	0.890544	0.999879	PROCR
ENSG00000101003	13.5513	-0.12498	0.596319	-0.209586	0.833991	0.999879	GINS1
ENSG00000101019	33.0982	0.0454819	0.395906	0.114881	0.90854	0.999879	UQCC1
ENSG00000101052	35.0494	0.267314	0.392602	0.680878	0.495949	0.999879	IFT52
ENSG00000101057	257.121	-0.0689303	0.235036	-0.293276	0.769311	0.999879	MYBL2
ENSG00000101079	54.3535	0.000799182	0.325443	0.00245568	0.998041	0.999879	NDRG3
ENSG00000101084	422.439	0.0538704	0.237641	0.226688	0.820666	0.999879	C20orf24
ENSG00000101109	19.9631	-0.506812	0.536503	-0.944658	0.344833	0.999879	STK4
ENSG00000101126	66.5564	-0.228155	0.314808	-0.724744	0.468609	0.999879	ADNP
ENSG00000101132	154.863	0.16221	0.244284	0.664022	0.506676	0.999879	PFDN4
ENSG00000101138	71.752	0.202377	0.297274	0.680775	0.496014	0.999879	CSTF1
ENSG00000101146	96.1149	0.0117697	0.266825	0.0441101	0.964817	0.999879	RAE1
ENSG00000101150	207.368	-0.371644	0.269652	-1.37824	0.16813	0.999879	TPD52L2
ENSG00000101152	55.3257	-0.576522	0.338455	-1.70339	0.0884946	0.999879	DNAJC5
ENSG00000101158	162.174	0.216223	0.242156	0.89291	0.371905	0.999879	NELFCD
ENSG00000101160	219.74	-0.0705257	0.240995	-0.292644	0.769794	0.999879	CTSZ
ENSG00000101166	205.165	0.124224	0.262313	0.473571	0.635806	0.999879	PRELID3B
ENSG00000101181	33.9483	0.0305741	0.370487	0.0825241	0.93423	0.999879	MTG2
ENSG00000101182	1002.87	0.0541808	0.198823	0.272508	0.785231	0.999879	PSMA7
ENSG00000101187	18.5784	0.23994	0.486389	0.493308	0.621795	0.999879	SLCO4A1
ENSG00000101189	50.9388	-0.43112	0.322157	-1.33823	0.180821	0.999879	MRGBP
ENSG00000101190	23.9017	0.212665	0.427459	0.497511	0.618829	0.999879	TCFL5
ENSG00000101191	44.3894	-0.550632	0.368293	-1.49509	0.13489	0.999879	DIDO1
ENSG00000101193	68.0948	-0.303392	0.301663	-1.00573	0.314544	0.999879	GID8
ENSG00000101199	69.2158	0.0303485	0.341621	0.0888369	0.929212	0.999879	ARFGAP1
ENSG00000101210	223.344	0.0439969	0.228541	0.192512	0.847341	0.999879	EEF1A2
ENSG00000101216	21.3486	-0.0339846	0.448347	-0.0757997	0.939578	0.999879	GMEB2
ENSG00000101220	82.6506	-0.177568	0.304109	-0.583896	0.55929	0.999879	C20orf27
ENSG00000101224	92.735	-0.177997	0.279882	-0.635972	0.524795	0.999879	CDC25B
ENSG00000101236	13.6085	0.175177	0.557256	0.314356	0.753251	0.999879	RNF24
ENSG00000101246	32.173	0.0186355	0.390519	0.0477199	0.961939	0.999879	ARFRP1
ENSG00000101247	23.1682	0.118661	0.429241	0.276443	0.782208	0.999879	NDUFAF5
ENSG00000101255	26.6332	-0.425521	0.437875	-0.971785	0.331157	0.999879	TRIB3
ENSG00000101266	65.4222	-0.0483302	0.313406	-0.154209	0.877445	0.999879	CSNK2A1
ENSG00000101290	21.3975	-0.305785	0.449282	-0.68061	0.496119	0.999879	CDS2
ENSG00000101294	242.725	0.145338	0.254509	0.571052	0.567965	0.999879	HM13
ENSG00000101310	46.1777	-0.114114	0.353956	-0.322396	0.747153	0.999879	SEC23B
ENSG00000101311	17.0364	-0.0244922	0.503146	-0.0486782	0.961176	0.999879	FERMT1
ENSG00000101335	647.018	-0.186049	0.748026	-0.24872	0.803578	0.999879	MYL9
ENSG00000101337	43.1812	-0.0772074	0.355552	-0.217148	0.828093	0.999879	TM9SF4
ENSG00000101343	15.7049	0.0757307	0.531771	0.142412	0.886754	0.999879	CRNKL1
ENSG00000101346	53.2609	-0.704032	0.334882	-2.10233	0.0355244	0.999879	POFUT1
ENSG00000101347	31.7688	-0.378008	0.422487	-0.89472	0.370937	0.999879	SAMHD1
ENSG00000101350	28.04	-0.360344	0.415223	-0.867832	0.385486	0.999879	KIF3B
ENSG00000101361	159.184	0.209563	0.249446	0.840116	0.400843	0.999879	NOP56
ENSG00000101363	70.0625	0.0615144	0.312858	0.196621	0.844124	0.999879	MANBAL
ENSG00000101365	82.5227	0.0481701	0.295429	0.163051	0.870478	0.999879	IDH3B
ENSG00000101367	232.416	0.0585127	0.252246	0.231967	0.816564	0.999879	MAPRE1
ENSG00000101384	14.1419	-1.17528	0.676704	-1.73677	0.0824283	0.999879	JAG1
ENSG00000101391	44.0406	0.204039	0.373982	0.545585	0.585352	0.999879	CDK5RAP1
ENSG00000101400	28.2068	0.0150119	0.402944	0.0372556	0.970281	0.999879	SNTA1
ENSG00000101407	39.9111	-0.382093	0.373087	-1.02414	0.305769	0.999879	TTI1
ENSG00000101412	70.4213	-0.0532013	0.302051	-0.176133	0.860189	0.999879	E2F1
ENSG00000101413	25.7535	-0.58609	0.419499	-1.39712	0.162378	0.999879	RPRD1B
ENSG00000101417	20.2505	-0.0685834	0.473043	-0.144983	0.884724	0.999879	PXMP4
ENSG00000101421	153.171	0.200607	0.23873	0.840312	0.400734	0.999879	CHMP4B
ENSG00000101439	130.204	0.229053	0.262923	0.871179	0.383656	0.999879	CST3
ENSG00000101442	14.0013	0.281392	0.578595	0.486336	0.626729	0.999879	ACTR5
ENSG00000101444	412.701	-0.0698315	0.213916	-0.326444	0.744088	0.999879	AHCY
ENSG00000101447	87.3019	0.0311662	0.28229	0.110405	0.912088	0.999879	FAM83D
ENSG00000101452	11.7137	0.142608	0.591171	0.24123	0.809377	0.999879	DHX35
ENSG00000101457	55.1375	-0.164587	0.317772	-0.517942	0.604499	0.999879	DNTTIP1
ENSG00000101460	25.847	0.321196	0.46196	0.695288	0.486875	0.999879	MAP1LC3A
ENSG00000101464	36.8914	-0.0812763	0.399841	-0.203271	0.838923	0.999879	PIGU
ENSG00000101473	50.0438	0.0590909	0.344083	0.171735	0.863646	0.999879	ACOT8
ENSG00000101474	95.4355	-0.0287766	0.284258	-0.101234	0.919365	0.999879	APMAP
ENSG00000101544	18.6996	-0.425564	0.471825	-0.901952	0.367082	0.999879	ADNP2
ENSG00000101546	25.6959	0.267995	0.440785	0.607994	0.543191	0.999879	RBFA
ENSG00000101557	97.7339	-0.404814	0.264845	-1.5285	0.126389	0.999879	USP14
ENSG00000101558	330.636	0.0341566	0.235839	0.14483	0.884845	0.999879	VAPA
ENSG00000101574	11.9062	0.107771	0.570916	0.188769	0.850274	0.999879	METTL4
ENSG00000101577	10.0731	-1.03883	0.631899	-1.64398	0.10018	0.999879	LPIN2
ENSG00000101596	31.6704	-0.28156	0.434332	-0.64826	0.516817	0.999879	SMCHD1
ENSG00000101608	399.201	0.0472894	0.27675	0.170874	0.864323	0.999879	MYL12A
ENSG00000101624	15.6157	0.573427	0.53759	1.06666	0.286124	0.999879	CEP76
ENSG00000101639	12.1262	0.302283	0.627995	0.481345	0.630271	0.999879	CEP192
ENSG00000101654	20.6604	-0.0805093	0.476062	-0.169115	0.865706	0.999879	RNMT
ENSG00000101665	27.2494	-0.29253	0.479979	-0.609464	0.542217	0.999879	SMAD7
ENSG00000101680	7.29164	-1.01626	0.757468	-1.34165	0.179709	0.999879	LAMA1
ENSG00000101745	7.15196	0.59151	0.74332	0.795767	0.426167	0.999879	ANKRD12
ENSG00000101752	21.8556	-0.00280302	0.492501	-0.0056914	0.995459	0.999879	MIB1
ENSG00000101773	32.7109	0.391394	0.422665	0.926015	0.354438	0.999879	RBBP8
ENSG00000101782	45.8478	0.107922	0.355916	0.303222	0.76172	0.999879	RIOK3
ENSG00000101811	39.2489	0.0644589	0.375115	0.171838	0.863565	0.999879	CSTF2
ENSG00000101843	120.109	-0.130556	0.317072	-0.411756	0.680518	0.999879	PSMD10
ENSG00000101844	12.951	-0.312719	0.558841	-0.559585	0.575763	0.999879	ATG4A
ENSG00000101846	15.8995	-0.574284	0.548962	-1.04613	0.295502	0.999879	STS
ENSG00000101849	38.3198	-0.217079	0.368522	-0.589052	0.555826	0.999879	TBL1X
ENSG00000101856	284.786	0.0726727	0.246184	0.295197	0.767843	0.999879	PGRMC1
ENSG00000101868	55.6365	-0.253179	0.347191	-0.729221	0.465867	0.999879	POLA1
ENSG00000101871	22.0348	0.294798	0.465837	0.632836	0.526841	0.999879	MID1
ENSG00000101882	33.1904	-0.205929	0.441869	-0.466042	0.641185	0.999879	NKAP
ENSG00000101888	23.4549	0.213901	0.440577	0.485503	0.62732	0.999879	NXT2
ENSG00000101901	60.3231	0.464311	0.324926	1.42898	0.153011	0.999879	ALG13
ENSG00000101911	90.7242	-0.254601	0.282581	-0.900983	0.367597	0.999879	PRPS2
ENSG00000101928	17.1572	0.0695752	0.50325	0.138252	0.890041	0.999879	MOSPD1
ENSG00000101935	24.9374	-0.595676	0.431977	-1.37895	0.167909	0.999879	AMMECR1
ENSG00000101940	72.1205	0.0940657	0.300591	0.312936	0.754329	0.999879	WDR13
ENSG00000101945	35.9361	-0.269066	0.371049	-0.72515	0.46836	0.999879	SUV39H1
ENSG00000101966	16.5063	-0.488306	0.59314	-0.823257	0.410362	0.999879	XIAP
ENSG00000101972	94.8383	0.0403063	0.321781	0.12526	0.900318	0.999879	STAG2
ENSG00000101974	26.8115	0.124299	0.415068	0.299466	0.764585	0.999879	ATP11C
ENSG00000101986	78.4782	-0.124943	0.288306	-0.433371	0.664746	0.999879	ABCD1
ENSG00000101997	34.5834	0.151296	0.378001	0.400253	0.68897	0.999879	CCDC22
ENSG00000102007	590.332	0.0885152	0.214006	0.41361	0.679159	0.999879	PLP2
ENSG00000102024	410.795	0.0085417	0.233372	0.0366012	0.970803	0.999879	PLS3
ENSG00000102030	276.879	-0.0274021	0.219449	-0.124868	0.900628	0.999879	NAA10
ENSG00000102034	19.0816	0.0943271	0.466398	0.202246	0.839725	0.999879	ELF4
ENSG00000102038	54.6271	-0.054277	0.333506	-0.162747	0.870718	0.999879	SMARCA1
ENSG00000102048	14.1412	-0.107977	0.567686	-0.190205	0.849149	0.999879	ASB9
ENSG00000102054	335.726	-0.074542	0.212122	-0.351411	0.72528	0.999879	RBBP7
ENSG00000102078	16.5825	0.27958	0.497175	0.562338	0.573886	0.999879	SLC25A14
ENSG00000102081	44.2267	-0.168926	0.44411	-0.38037	0.703671	0.999879	FMR1
ENSG00000102096	18.2477	0.201432	0.474051	0.424917	0.670897	0.999879	PIM2
ENSG00000102100	37.6981	0.0126298	0.357668	0.0353115	0.971831	0.999879	SLC35A2
ENSG00000102103	125.634	0.0931735	0.255447	0.364747	0.7153	0.999879	PQBP1
ENSG00000102119	283.603	0.0302438	0.254498	0.118837	0.905405	0.999879	EMD
ENSG00000102125	21.8695	0.0507208	0.472975	0.107238	0.9146	0.999879	TAZ
ENSG00000102144	1292.38	0.0295044	0.221398	0.133264	0.893984	0.999879	PGK1
ENSG00000102158	85.6738	-0.0631726	0.331254	-0.190707	0.848755	0.999879	MAGT1
ENSG00000102172	278.792	0.238022	0.216094	1.10147	0.270691	0.999879	SMS
ENSG00000102178	100.799	-0.126877	0.267862	-0.473667	0.635737	0.999879	UBL4A
ENSG00000102181	22.8518	-0.112786	0.438984	-0.256926	0.797236	0.999879	CD99L2
ENSG00000102189	11.8207	0.179578	0.603081	0.297768	0.76588	0.999879	EEA1
ENSG00000102218	18.6329	0.0608442	0.518975	0.117239	0.90667	0.999879	RP2
ENSG00000102221	18.6301	0.150039	0.498431	0.301023	0.763397	0.999879	JADE3
ENSG00000102225	141.225	-0.0826145	0.254471	-0.324651	0.745445	0.999879	CDK16
ENSG00000102226	75.24	-0.172503	0.3093	-0.557721	0.577035	0.999879	USP11
ENSG00000102241	70.018	-0.182746	0.332695	-0.549291	0.582806	0.999879	HTATSF1
ENSG00000102265	206.693	0.460725	0.297118	1.55064	0.120987	0.999879	TIMP1
ENSG00000102287	29.0581	-0.366088	0.504702	-0.725354	0.468235	0.999879	GABRE
ENSG00000102302	8.51128	-1.01383	0.789189	-1.28465	0.198915	0.999879	FGD1
ENSG00000102309	97.8394	0.436202	0.349481	1.24814	0.211979	0.999879	PIN4
ENSG00000102312	18.6065	-0.0650903	0.470449	-0.138358	0.889958	0.999879	PORCN
ENSG00000102316	120.618	-0.224618	0.26057	-0.862024	0.388675	0.999879	MAGED2
ENSG00000102317	283.763	0.0252632	0.228137	0.110737	0.911825	0.999879	RBM3
ENSG00000102384	15.7386	0.00276395	0.50737	0.00544761	0.995653	0.999879	CENPI
ENSG00000102390	21.774	0.516381	0.443994	1.16304	0.244815	0.999879	PBDC1
ENSG00000102393	154.055	0.174643	0.274467	0.636299	0.524581	0.999879	GLA
ENSG00000102401	57.6121	-0.0177126	0.329858	-0.0536978	0.957176	0.999879	ARMCX3
ENSG00000102471	108.998	-0.0441597	0.262175	-0.168436	0.86624	0.999879	NDFIP2
ENSG00000102531	65.7954	-0.211431	0.343178	-0.616098	0.53783	0.999879	FNDC3A
ENSG00000102543	11.5966	0.405628	0.597574	0.678791	0.49727	0.999879	CDADC1
ENSG00000102554	124.063	-0.368207	0.267458	-1.37669	0.168608	0.999879	KLF5
ENSG00000102572	128.983	0.106808	0.249683	0.427773	0.668816	0.999879	STK24
ENSG00000102580	27.3759	-0.596481	0.414725	-1.43826	0.150361	0.999879	DNAJC3
ENSG00000102595	25.5327	0.0548298	0.438686	0.124987	0.900534	0.999879	UGGT2
ENSG00000102606	27.2272	-0.336711	0.440996	-0.763524	0.445151	0.999879	ARHGEF7
ENSG00000102699	42.3856	-0.392379	0.353182	-1.11098	0.266575	0.999879	PARP4
ENSG00000102710	22.7445	-0.280924	0.454108	-0.618628	0.536161	0.999879	SUPT20H
ENSG00000102738	29.7106	0.220164	0.432895	0.508585	0.611043	0.999879	MRPS31
ENSG00000102753	62.6134	-0.0647593	0.310724	-0.208414	0.834906	0.999879	KPNA3
ENSG00000102760	23.1114	-0.170544	0.592949	-0.28762	0.773638	0.999879	RGCC
ENSG00000102763	11.9265	-0.268418	0.60673	-0.442401	0.658199	0.999879	VWA8
ENSG00000102780	7.70535	-0.168015	0.742055	-0.226419	0.820876	0.999879	DGKH
ENSG00000102781	12.6801	-0.19179	0.564115	-0.339985	0.733868	0.999879	KATNAL1
ENSG00000102786	22.7134	0.564744	0.456429	1.23731	0.215972	0.999879	INTS6
ENSG00000102804	367.09	-0.473434	0.24719	-1.91526	0.0554588	0.999879	TSC22D1
ENSG00000102805	33.3741	0.66415	0.406074	1.63554	0.101936	0.999879	CLN5
ENSG00000102854	69.4558	0.28153	0.326284	0.862837	0.388227	0.999879	MSLN
ENSG00000102858	31.6867	-0.354928	0.413764	-0.857802	0.391002	0.999879	MGRN1
ENSG00000102870	13.6884	-0.663995	0.586408	-1.13231	0.257504	0.999879	ZNF629
ENSG00000102871	15.8337	0.252288	0.538609	0.468407	0.639493	0.999879	TRADD
ENSG00000102882	68.3199	-0.253153	0.296776	-0.853009	0.393654	0.999879	MAPK3
ENSG00000102893	43.7643	-0.232153	0.350177	-0.662959	0.507357	0.999879	PHKB
ENSG00000102897	23.4417	0.173046	0.482825	0.358402	0.720042	0.999879	LYRM1
ENSG00000102898	185.782	0.0635134	0.303452	0.209303	0.834212	0.999879	NUTF2
ENSG00000102900	94.2564	-0.0699272	0.281965	-0.247999	0.804135	0.999879	NUP93
ENSG00000102901	26.5759	-0.0665746	0.4374	-0.152205	0.879025	0.999879	CENPT
ENSG00000102908	9.46319	0.333198	0.683072	0.487794	0.625696	0.999879	NFAT5
ENSG00000102910	32.4286	-0.531593	0.377181	-1.40938	0.158722	0.999879	LONP2
ENSG00000102921	14.0089	-0.236103	0.565547	-0.417477	0.676329	0.999879	N4BP1
ENSG00000102931	51.115	-0.135458	0.319935	-0.423392	0.672009	0.999879	ARL2BP
ENSG00000102934	12.9094	-0.0768337	0.57836	-0.132847	0.894314	0.999879	PLLP
ENSG00000102967	16.4601	-0.048386	0.501021	-0.0965749	0.923064	0.999879	DHODH
ENSG00000102974	35.9221	-0.227731	0.37601	-0.605651	0.544746	0.999879	CTCF
ENSG00000102977	43.812	0.0130969	0.342557	0.0382329	0.969502	0.999879	ACD
ENSG00000102978	110.737	0.0429175	0.27715	0.154853	0.876937	0.999879	POLR2C
ENSG00000102996	8.15337	0.47856	0.686232	0.697373	0.485569	0.999879	MMP15
ENSG00000103005	49.3009	-0.239073	0.342768	-0.697479	0.485503	0.999879	USB1
ENSG00000103018	147.527	0.0242841	0.2537	0.0957198	0.923743	0.999879	CYB5B
ENSG00000103024	98.2257	0.0433264	0.299636	0.144597	0.885029	0.999879	NME3
ENSG00000103035	173.176	-0.0963263	0.244703	-0.393646	0.693842	0.999879	PSMD7
ENSG00000103037	18.1499	0.271811	0.490476	0.554179	0.579456	0.999879	SETD6
ENSG00000103042	14.7123	-0.350115	0.528669	-0.662258	0.507806	0.999879	SLC38A7
ENSG00000103043	40.2722	-0.534328	0.373118	-1.43206	0.152126	0.999879	VAC14
ENSG00000103047	12.3753	0.224387	0.591647	0.379259	0.704495	0.999879	TANGO6
ENSG00000103051	57.594	-0.0745593	0.320196	-0.232856	0.815874	0.999879	COG4
ENSG00000103061	13.7661	0.0798045	0.538912	0.148084	0.882276	0.999879	SLC7A6OS
ENSG00000103064	41.6891	-0.588728	0.353077	-1.66742	0.0954304	0.999879	SLC7A6
ENSG00000103066	15.3703	-0.385679	0.517157	-0.745767	0.455808	0.999879	PLA2G15
ENSG00000103091	14.4521	-0.0208114	0.526695	-0.0395132	0.968481	0.999879	WDR59
ENSG00000103111	19.3258	-0.252072	0.472124	-0.53391	0.593404	0.999879	MON1B
ENSG00000103121	116.352	0.150429	0.268708	0.559824	0.5756	0.999879	CMC2
ENSG00000103126	36.3541	-0.411253	0.410116	-1.00277	0.315971	0.999879	AXIN1
ENSG00000103145	252.014	0.156099	0.280878	0.555756	0.578378	0.999879	HCFC1R1
ENSG00000103148	35.4994	-0.615447	0.37818	-1.62739	0.103653	0.999879	NPRL3
ENSG00000103150	11.056	-0.491562	0.595282	-0.825764	0.408938	0.999879	MLYCD
ENSG00000103152	80.5868	0.406477	0.30309	1.34111	0.179884	0.999879	MPG
ENSG00000103160	12.7898	-0.262364	0.57772	-0.454137	0.64973	0.999879	HSDL1
ENSG00000103168	13.2884	0.243593	0.55385	0.439818	0.660069	0.999879	TAF1C
ENSG00000103174	33.6283	0.322703	0.380203	0.848765	0.396012	0.999879	NAGPA
ENSG00000103175	43.8704	0.171534	0.386045	0.444338	0.656798	0.999879	WFDC1
ENSG00000103187	313.291	0.0198277	0.267691	0.0740693	0.940955	0.999879	COTL1
ENSG00000103194	58.2622	-0.207696	0.315013	-0.659327	0.509686	0.999879	USP10
ENSG00000103197	60.6318	0.267337	0.327223	0.816989	0.413935	0.999879	TSC2
ENSG00000103202	112.13	0.259532	0.257738	1.00696	0.313953	0.999879	NME4
ENSG00000103222	71.502	0.0277754	0.336882	0.0824483	0.93429	0.999879	ABCC1
ENSG00000103226	37.5367	-0.086891	0.375285	-0.231533	0.816901	0.999879	NOMO3
ENSG00000103241	30.4997	-0.596582	0.512101	-1.16497	0.244031	0.999879	FOXF1
ENSG00000103245	33.7889	-0.0360194	0.404516	-0.0890432	0.929048	0.999879	NARFL
ENSG00000103248	10.5438	0.10951	0.620472	0.176495	0.859905	0.999879	MTHFSD
ENSG00000103249	57.695	0.110638	0.314393	0.351909	0.724906	0.999879	CLCN7
ENSG00000103253	40.0414	0.0946734	0.346384	0.273319	0.784608	0.999879	HAGHL
ENSG00000103254	66.8384	0.1448	0.299464	0.48353	0.62872	0.999879	FAM173A
ENSG00000103257	1330.23	-0.445175	0.25109	-1.77297	0.0762342	0.999879	SLC7A5
ENSG00000103260	100.978	0.297146	0.270182	1.0998	0.271421	0.999879	METRN
ENSG00000103264	12.309	0.48527	0.5766	0.841605	0.400009	0.999879	FBXO31
ENSG00000103266	217.786	-0.0579744	0.224816	-0.257874	0.796504	0.999879	STUB1
ENSG00000103274	45.6485	-0.103958	0.343367	-0.302761	0.762072	0.999879	NUBP1
ENSG00000103275	268.035	0.147074	0.219732	0.669334	0.503283	0.999879	UBE2I
ENSG00000103319	28.9028	-0.165015	0.489827	-0.336885	0.736204	0.999879	EEF2K
ENSG00000103326	28.9072	-0.420337	0.410892	-1.02299	0.306315	0.999879	CAPN15
ENSG00000103335	74.0721	0.326435	0.369021	0.884595	0.376375	0.999879	PIEZO1
ENSG00000103342	211.504	-0.140931	0.231968	-0.607543	0.543491	0.999879	GSPT1
ENSG00000103343	12.7527	-0.413531	0.576718	-0.717042	0.473348	0.999879	ZNF174
ENSG00000103351	13.4471	0.416632	0.557053	0.747921	0.454508	0.999879	CLUAP1
ENSG00000103353	88.6641	-0.0382485	0.276128	-0.138517	0.889832	0.999879	UBFD1
ENSG00000103356	33.5946	-0.407433	0.400022	-1.01853	0.308427	0.999879	EARS2
ENSG00000103363	772.496	0.202594	0.331402	0.611324	0.540985	0.999879	ELOB
ENSG00000103365	39.8897	0.0702423	0.353015	0.198978	0.84228	0.999879	GGA2
ENSG00000103381	18.1953	-0.0788291	0.519665	-0.151692	0.87943	0.999879	CPPED1
ENSG00000103404	16.0985	-0.211657	0.509207	-0.41566	0.677659	0.999879	USP31
ENSG00000103415	77.3047	-0.0374996	0.302501	-0.123965	0.901343	0.999879	HMOX2
ENSG00000103423	114.622	-0.110692	0.268256	-0.412637	0.679872	0.999879	DNAJA3
ENSG00000103429	85.1826	0.258698	0.304911	0.848437	0.396195	0.999879	BFAR
ENSG00000103479	16.7591	-0.44437	0.508392	-0.87407	0.38208	0.999879	RBL2
ENSG00000103485	13.1472	-0.0526558	0.778543	-0.0676338	0.946077	0.999879	QPRT
ENSG00000103494	25.237	0.0510904	0.428285	0.119291	0.905045	0.999879	RPGRIP1L
ENSG00000103495	455.699	-0.163344	0.229327	-0.712274	0.476295	0.999879	MAZ
ENSG00000103496	42.0406	0.18071	0.376846	0.479534	0.631559	0.999879	STX4
ENSG00000103502	141.582	0.00377129	0.269973	0.0139692	0.988855	0.999879	CDIPT
ENSG00000103507	81.6298	-0.0906556	0.309256	-0.293141	0.769414	0.999879	BCKDK
ENSG00000103510	37.5849	-0.0146099	0.366189	-0.0398972	0.968175	0.999879	KAT8
ENSG00000103512	136.132	0.147442	0.244809	0.602273	0.546993	0.999879	NOMO1
ENSG00000103528	7.69323	0.556242	0.732154	0.759733	0.447414	0.999879	SYT17
ENSG00000103540	11.3094	0.520158	0.665096	0.78208	0.434167	0.999879	CCP110
ENSG00000103544	52.1987	-0.14468	0.322454	-0.448685	0.653659	0.999879	C16orf62
ENSG00000103549	105.262	-0.153794	0.271331	-0.566814	0.57084	0.999879	RNF40
ENSG00000103550	34.7556	-0.1451	0.379781	-0.382062	0.702416	0.999879	KNOP1
ENSG00000103591	63.4619	-0.0507369	0.318221	-0.159439	0.873323	0.999879	AAGAB
ENSG00000103642	18.0284	-0.159947	0.489443	-0.326794	0.743824	0.999879	LACTB
ENSG00000103653	42.6175	-0.164725	0.380836	-0.432536	0.665352	0.999879	CSK
ENSG00000103657	13.5804	-0.828765	0.554598	-1.49435	0.135084	0.999879	HERC1
ENSG00000103671	16.1931	0.277985	0.52509	0.529404	0.596525	0.999879	TRIP4
ENSG00000103707	20.2713	-0.248027	0.457185	-0.542509	0.587468	0.999879	MTFMT
ENSG00000103740	15.9468	0.13263	0.579436	0.228895	0.81895	0.999879	ACSBG1
ENSG00000103769	153.932	-0.00770229	0.252345	-0.0305228	0.97565	0.999879	RAB11A
ENSG00000103852	10.7302	0.711	0.652354	1.0899	0.275757	0.999879	TTC23
ENSG00000103855	83.193	-0.0843446	0.305535	-0.276056	0.782505	0.999879	CD276
ENSG00000103876	43.4411	-0.318794	0.375815	-0.848273	0.396286	0.999879	FAH
ENSG00000103932	23.5987	-0.266882	0.441779	-0.604107	0.545773	0.999879	RPAP1
ENSG00000103966	32.9749	-0.31388	0.425816	-0.737127	0.461045	0.999879	EHD4
ENSG00000103978	63.3301	0.325478	0.329628	0.987409	0.323442	0.999879	TMEM87A
ENSG00000103994	35.7547	-0.610948	0.412562	-1.48086	0.138643	0.999879	ZNF106
ENSG00000103995	10.6687	0.495081	0.616839	0.80261	0.4222	0.999879	CEP152
ENSG00000104047	31.4642	0.295448	0.406746	0.726369	0.467612	0.999879	DTWD1
ENSG00000104064	37.1468	-0.103342	0.369291	-0.279838	0.779602	0.999879	GABPB1
ENSG00000104067	31.8307	0.0119088	0.382806	0.0311092	0.975182	0.999879	TJP1
ENSG00000104081	19.3839	-0.433157	0.493665	-0.87743	0.380253	0.999879	BMF
ENSG00000104093	9.23747	0.0926021	0.656048	0.141151	0.88775	0.999879	DMXL2
ENSG00000104129	19.3806	0.061107	0.47318	0.129141	0.897246	0.999879	DNAJC17
ENSG00000104131	187.437	-0.102467	0.258819	-0.395904	0.692176	0.999879	EIF3J
ENSG00000104133	19.0743	-0.105164	0.491902	-0.213792	0.83071	0.999879	SPG11
ENSG00000104142	25.6495	-0.396438	0.462316	-0.857504	0.391166	0.999879	VPS18
ENSG00000104147	67.4585	-0.125448	0.311619	-0.402569	0.687265	0.999879	OIP5
ENSG00000104164	45.0476	-0.328092	0.33843	-0.969454	0.332319	0.999879	BLOC1S6
ENSG00000104213	9.58828	0.0755782	0.674675	0.112022	0.910806	0.999879	PDGFRL
ENSG00000104218	7.97514	0.360442	0.731098	0.493014	0.622002	0.999879	CSPP1
ENSG00000104219	26.35	0.438438	0.45362	0.966533	0.333778	0.999879	ZDHHC2
ENSG00000104221	17.5135	0.11653	0.505493	0.230528	0.817681	0.999879	BRF2
ENSG00000104228	12.3184	0.522035	0.595914	0.876024	0.381017	0.999879	TRIM35
ENSG00000104231	52.3924	0.19092	0.321949	0.593014	0.553172	0.999879	ZFAND1
ENSG00000104267	31.5886	-0.132562	0.462181	-0.286819	0.774251	0.999879	CA2
ENSG00000104299	19.6359	0.0576157	0.476531	0.120906	0.903765	0.999879	INTS9
ENSG00000104312	21.9313	0.178654	0.445259	0.401237	0.688246	0.999879	RIPK2
ENSG00000104320	32.4869	-0.250314	0.387066	-0.646696	0.517829	0.999879	NBN
ENSG00000104325	48.9493	0.379902	0.33424	1.13661	0.2557	0.999879	DECR1
ENSG00000104331	75.3564	0.242083	0.29758	0.813507	0.415928	0.999879	IMPAD1
ENSG00000104341	422.111	-0.0909327	0.270838	-0.335746	0.737062	0.999879	LAPTM4B
ENSG00000104343	29.4831	0.330265	0.410347	0.804844	0.42091	0.999879	UBE2W
ENSG00000104356	23.4632	-0.201811	0.44101	-0.457612	0.647231	0.999879	POP1
ENSG00000104365	21.8989	-0.0839324	0.449651	-0.186661	0.851926	0.999879	IKBKB
ENSG00000104369	16.2861	-0.132368	0.546539	-0.242193	0.808631	0.999879	JPH1
ENSG00000104375	15.6827	0.266804	0.536134	0.497644	0.618735	0.999879	STK3
ENSG00000104381	13.1064	0.0386197	0.598231	0.0645565	0.948527	0.999879	GDAP1
ENSG00000104388	144.33	-0.108978	0.247242	-0.440773	0.659378	0.999879	RAB2A
ENSG00000104408	648.813	0.280089	0.227576	1.23075	0.218418	0.999879	EIF3E
ENSG00000104412	24.0734	0.264447	0.476278	0.555237	0.578733	0.999879	EMC2
ENSG00000104419	70.688	-0.1271	0.357671	-0.355353	0.722325	0.999879	NDRG1
ENSG00000104427	9.17778	0.172079	0.665283	0.258656	0.795901	0.999879	ZC2HC1A
ENSG00000104442	48.1204	0.0913925	0.348421	0.262305	0.793086	0.999879	ARMC1
ENSG00000104447	14.8389	-0.443273	0.609762	-0.726961	0.46725	0.999879	TRPS1
ENSG00000104450	9.81229	-0.200221	0.63234	-0.316635	0.75152	0.999879	SPAG1
ENSG00000104472	82.3481	-0.266334	0.301472	-0.883446	0.376995	0.999879	CHRAC1
ENSG00000104517	43.6041	-0.505261	0.387468	-1.30401	0.192231	0.999879	UBR5
ENSG00000104518	11.5608	-0.366258	0.584169	-0.626973	0.530677	0.999879	GSDMD
ENSG00000104522	160.013	0.239723	0.242489	0.988591	0.322864	0.999879	TSTA3
ENSG00000104524	38.4984	-0.185979	0.36008	-0.516494	0.605509	0.999879	PYCR3
ENSG00000104529	1125.75	0.186601	0.193697	0.963362	0.335366	0.999879	EEF1D
ENSG00000104549	59.1454	0.00124533	0.311207	0.00400159	0.996807	0.999879	SQLE
ENSG00000104611	39.1351	-0.376369	0.361399	-1.04142	0.297679	0.999879	SH2D4A
ENSG00000104613	107.271	0.15017	0.305229	0.49199	0.622726	0.999879	INTS10
ENSG00000104626	37.5951	-0.0878586	0.366121	-0.239972	0.810352	0.999879	ERI1
ENSG00000104635	92.5403	-0.374134	0.275662	-1.35722	0.174711	0.999879	SLC39A14
ENSG00000104643	11.1822	-0.0732645	0.604237	-0.121251	0.903492	0.999879	MTMR9
ENSG00000104660	72.4847	0.15371	0.291293	0.527681	0.597721	0.999879	LEPROTL1
ENSG00000104671	71.8682	0.228591	0.308552	0.740852	0.458783	0.999879	DCTN6
ENSG00000104679	40.5968	0.0610811	0.357585	0.170816	0.864369	0.999879	R3HCC1
ENSG00000104687	131.107	-0.222655	0.297325	-0.74886	0.453942	0.999879	GSR
ENSG00000104689	10.8348	0.800285	0.60774	1.31682	0.187899	0.999879	TNFRSF10A
ENSG00000104691	29.1379	-0.0995147	0.418377	-0.237859	0.811991	0.999879	UBXN8
ENSG00000104695	108.051	-0.19329	0.275905	-0.700568	0.483573	0.999879	PPP2CB
ENSG00000104714	19.1982	-0.276132	0.478533	-0.577038	0.563914	0.999879	ERICH1
ENSG00000104723	114.823	0.0885443	0.276416	0.32033	0.748718	0.999879	TUSC3
ENSG00000104728	24.2486	-0.531565	0.485646	-1.09455	0.273713	0.999879	ARHGEF10
ENSG00000104731	15.6648	0.015484	0.513088	0.0301781	0.975925	0.999879	KLHDC4
ENSG00000104738	206.959	-0.139268	0.244664	-0.569222	0.569206	0.999879	MCM4
ENSG00000104756	40.319	-0.213695	0.383417	-0.557344	0.577292	0.999879	KCTD9
ENSG00000104763	96.5827	0.0615305	0.265786	0.231504	0.816923	0.999879	ASAH1
ENSG00000104765	71.9703	0.0122999	0.293288	0.0419378	0.966548	0.999879	BNIP3L
ENSG00000104774	15.7683	0.218676	0.507939	0.430516	0.66682	0.999879	MAN2B1
ENSG00000104783	77.0324	0.212457	0.295581	0.718778	0.472278	0.999879	KCNN4
ENSG00000104805	143.608	0.0951868	0.259107	0.367365	0.713347	0.999879	NUCB1
ENSG00000104812	42.3751	0.0360377	0.354836	0.101561	0.919105	0.999879	GYS1
ENSG00000104823	157.51	-0.102933	0.255151	-0.403422	0.686638	0.999879	ECH1
ENSG00000104824	309.921	0.0637854	0.221457	0.288026	0.773327	0.999879	HNRNPL
ENSG00000104825	20.1823	-0.329047	0.480449	-0.684874	0.493423	0.999879	NFKBIB
ENSG00000104835	42.7607	0.00334196	0.340758	0.00980743	0.992175	0.999879	SARS2
ENSG00000104852	153.023	0.112314	0.254336	0.441598	0.65878	0.999879	SNRNP70
ENSG00000104853	109.941	0.225697	0.253771	0.889371	0.373804	0.999879	CLPTM1
ENSG00000104859	27.4017	0.225648	0.432469	0.521766	0.601833	0.999879	CLASRP
ENSG00000104866	18.5719	-0.0634902	0.502309	-0.126397	0.899418	0.999879	PPP1R37
ENSG00000104872	152.73	-0.16352	0.287813	-0.568148	0.569934	0.999879	PIH1D1
ENSG00000104880	16.2501	0.077818	0.503208	0.154644	0.877102	0.999879	ARHGEF18
ENSG00000104881	43.7355	-0.289061	0.430758	-0.671053	0.502187	0.999879	PPP1R13L
ENSG00000104884	29.0667	0.191825	0.395264	0.485309	0.627457	0.999879	ERCC2
ENSG00000104885	22.0787	-0.349791	0.494248	-0.707724	0.479117	0.999879	DOT1L
ENSG00000104886	51.8057	0.156019	0.330205	0.47249	0.636577	0.999879	PLEKHJ1
ENSG00000104889	246.281	-0.0525154	0.2184	-0.240456	0.809977	0.999879	RNASEH2A
ENSG00000104897	96.1008	-0.187301	0.39399	-0.475396	0.634505	0.999879	SF3A2
ENSG00000104904	996.644	0.0472488	0.224333	0.210619	0.833185	0.999879	OAZ1
ENSG00000104907	92.0525	0.175651	0.272407	0.644809	0.519051	0.999879	TRMT1
ENSG00000104915	131.501	0.165012	0.255894	0.644844	0.519028	0.999879	STX10
ENSG00000104936	20.9698	0.287341	0.493235	0.582563	0.560187	0.999879	DMPK
ENSG00000104946	29.4635	0.31284	0.401072	0.780011	0.435384	0.999879	TBC1D17
ENSG00000104957	13.5174	0.783549	0.557522	1.40541	0.159898	0.999879	CCDC130
ENSG00000104960	167.533	0.184148	0.253852	0.725412	0.468199	0.999879	PTOV1
ENSG00000104964	401.015	0.0144159	0.208279	0.0692144	0.944819	0.999879	AES
ENSG00000104969	83.5592	-0.105623	0.303563	-0.347944	0.727882	0.999879	SGTA
ENSG00000104973	51.6661	-0.188054	0.346092	-0.543365	0.586879	0.999879	MED25
ENSG00000104976	24.0075	0.027035	0.432441	0.0625172	0.950151	0.999879	SNAPC2
ENSG00000104979	396.345	0.122227	0.305404	0.400213	0.688999	0.999879	C19orf53
ENSG00000104980	74.5223	-0.00250869	0.287626	-0.00872206	0.993041	0.999879	TIMM44
ENSG00000104983	11.1764	0.269254	0.630911	0.426771	0.669546	0.999879	CCDC61
ENSG00000105011	155.178	-0.0452187	0.254591	-0.177613	0.859027	0.999879	ASF1B
ENSG00000105048	7.53039	-0.182527	0.738221	-0.247253	0.804713	0.999879	TNNT1
ENSG00000105053	14.9313	-0.287173	0.564219	-0.508974	0.61077	0.999879	VRK3
ENSG00000105058	96.6138	0.112759	0.279176	0.4039	0.686287	0.999879	FAM32A
ENSG00000105063	100.803	0.0924317	0.261435	0.353556	0.723672	0.999879	PPP6R1
ENSG00000105085	13.7604	-0.0809142	0.542748	-0.149082	0.881489	0.999879	MED26
ENSG00000105127	29.4798	-0.636725	0.398412	-1.59815	0.110009	0.999879	AKAP8
ENSG00000105135	76.784	-0.00792475	0.285508	-0.0277567	0.977856	0.999879	ILVBL
ENSG00000105137	64.7536	-0.336881	0.338362	-0.995623	0.319433	0.999879	SYDE1
ENSG00000105171	72.4769	0.087938	0.296405	0.296682	0.766709	0.999879	POP4
ENSG00000105173	37.2826	0.139124	0.36637	0.379736	0.704141	0.999879	CCNE1
ENSG00000105176	79.2711	-0.0451147	0.323801	-0.139328	0.889191	0.999879	URI1
ENSG00000105185	301.536	0.173325	0.253941	0.68254	0.494898	0.999879	PDCD5
ENSG00000105186	19.4066	0.243461	0.491939	0.4949	0.62067	0.999879	ANKRD27
ENSG00000105193	3630.11	0.217535	0.234172	0.928953	0.352913	0.999879	RPS16
ENSG00000105197	161.117	0.0388433	0.253331	0.15333	0.878138	0.999879	TIMM50
ENSG00000105202	576.183	0.0609697	0.197465	0.308762	0.757503	0.999879	FBL
ENSG00000105204	18.7423	-0.351004	0.478577	-0.733432	0.463295	0.999879	DYRK1B
ENSG00000105220	805.236	0.196894	0.229897	0.856445	0.391752	0.999879	GPI
ENSG00000105221	110.185	-0.296063	0.271801	-1.08927	0.276037	0.999879	AKT2
ENSG00000105223	117.541	0.276267	0.257462	1.07304	0.283255	0.999879	PLD3
ENSG00000105229	22.211	-0.175521	0.445344	-0.394125	0.693489	0.999879	PIAS4
ENSG00000105245	39.5324	0.0108993	0.364972	0.0298634	0.976176	0.999879	NUMBL
ENSG00000105248	36.3817	0.138771	0.367266	0.377849	0.705543	0.999879	CCDC94
ENSG00000105254	136.481	0.0991263	0.262081	0.378228	0.705262	0.999879	TBCB
ENSG00000105255	30.7219	-0.0970062	0.400723	-0.242078	0.80872	0.999879	FSD1
ENSG00000105258	132.008	0.261426	0.339766	0.769428	0.441639	0.999879	POLR2I
ENSG00000105281	294.51	0.208532	0.212205	0.982695	0.325758	0.999879	SLC1A5
ENSG00000105287	17.7045	0.558951	0.518509	1.078	0.281035	0.999879	PRKD2
ENSG00000105290	15.0536	0.160919	0.527246	0.305208	0.760208	0.999879	APLP1
ENSG00000105298	22.8765	-0.0926612	0.444625	-0.208403	0.834914	0.999879	CACTIN
ENSG00000105321	17.4527	0.164886	0.488889	0.337266	0.735916	0.999879	CCDC9
ENSG00000105323	211.129	-0.0269891	0.315557	-0.0855286	0.931841	0.999879	HNRNPUL1
ENSG00000105325	32.8699	-0.284314	0.379441	-0.749297	0.453678	0.999879	FZR1
[truncated: 25,151 more rows]
