# Supplementary material for: Full-length direct RNA sequencing uncovers stress-granule dependent RNA decay upon cellular stress
Source: bioRxiv preprint, doi:10.1101/2023.08.31.555629, version 3 (2024-08-27)
Supplement: Supplementary Table 4 [file 555629_file06.xlsx]

## Sheet: Diff. Length - Nanoplen
Differential length analysis using NanopLen for arsenite-treated vs control cells.
Transcript ID	log2FC	pvalue	qvalue	Mean length Control	Mean length Treatment	Gene name
ENST00000000233	-0.12673	0.0151537	0.360231	992.762	934.683	ARF5
ENST00000000412	-0.0858808	0.406196	0.853418	1908.35	1825.95	M6PR
ENST00000000442	-0.20885	0.318149	0.816615	1918.4	1762.61	ESRRA
ENST00000001008	-0.0500327	0.84391	0.968332	1309.67	1340.67	FKBP4
ENST00000001146	-0.724343	0.620214	0.92053	2740	1889.5	CYP26B1
ENST00000002125	0.182431	0.351936	0.833411	1444.56	1587.4	NDUFAF7
ENST00000002165	-0.0990574	0.395638	0.850006	1450.77	1349.62	FUCA2
ENST00000002501	-0.210144	0.12608	0.674245	1844.31	1667.84	DBNDD1
ENST00000002596	NA	NA	NA	NA	NA	HS3ST1
ENST00000002829	-0.120617	0.742785	0.947607	1928.11	1963.84	SEMA3F
ENST00000003084	NA	NA	NA	NA	NA	CFTR
ENST00000003100	-0.199674	0.0899094	0.620978	1634.06	1419.12	CYP51A1
ENST00000003302	-0.272092	0.517977	0.890878	1727.81	1723.22	USP28
ENST00000003583	NA	NA	NA	3	1285.33	STPG1
ENST00000003912	-0.135849	0.643581	0.926782	1920.36	1712.86	NIPAL3
ENST00000004103	0.105802	0.819799	0.964033	876.444	932.5	TMEM176A
ENST00000004531	0.017612	0.982978	0.996114	1819.64	2067.5	SLC7A2
ENST00000004982	NA	NA	NA	NA	NA	HSPB6
ENST00000005082	NA	NA	NA	1889.5	536	ZNF195
ENST00000005178	-0.270707	0.140079	0.690187	1861.79	1583.51	PDK4
ENST00000005180	NA	NA	NA	NA	NA	CCL26
ENST00000005226	NA	NA	NA	3	886	USH1C
ENST00000005257	-0.0832926	0.586136	0.910875	1425.61	1381.62	RALA
ENST00000005259	-0.156789	0.347244	0.830868	1742.19	1533.04	BCAP29
ENST00000005260	-0.331761	0.0690075	0.577738	1761.02	1417.15	BAIAP2L1
ENST00000005284	NA	NA	NA	1	556	CACNG3
ENST00000005286	0.00832452	0.975979	0.99467	1364.02	1415.74	TMEM132A
ENST00000005340	0.00669378	0.968915	0.993817	1408.7	1523.18	DVL2
ENST00000005374	-0.569477	0.240966	0.772575	592.778	417.5	GGCT
ENST00000005386	-0.224393	0.0351005	0.472328	1759.02	1611.79	RPAP3
ENST00000005558	0.190356	0.843423	0.96831	1813.4	2018.25	IFRD1
ENST00000005756	NA	NA	NA	NA	NA	UPP2
ENST00000005995	-0.0710903	0.223907	0.761036	1098.36	1044.71	PRSS21
ENST00000006015	-0.48582	0.000856559	0.111393	1706.07	1241.9	HOXA11
ENST00000006053	NA	NA	NA	NA	NA	CX3CL1
ENST00000006251	-0.177246	0.222938	0.760441	2094	1855.5	PRR5
ENST00000006275	-0.0720626	0.268784	0.793907	872.625	827	TRAPPC6A
ENST00000006658	0.0168298	0.959625	0.992904	1770.77	1942.46	SPATA20
ENST00000006724	NA	NA	NA	NA	NA	CEACAM7
ENST00000006750	NA	NA	NA	NA	NA	CD79B
ENST00000006777	-0.237794	0.140197	0.69038	1277.05	1128.62	RHBDD2
ENST00000007264	0.00822155	0.95415	0.992463	1565.64	1587.9	RPUSD1
ENST00000007390	-0.0327166	0.546549	0.900646	1047.41	1035.29	TSR3
ENST00000007414	0.0252709	0.942966	0.989614	1917.53	1980.87	OSBPL7
ENST00000007510	NA	NA	NA	NA	NA	ARHGAP33
ENST00000007516	-0.0556304	0.0268667	0.43294	706.565	684.451	NDUFAB1
ENST00000007699	0.447214	0.329035	0.821593	1142.25	1483.5	YBX2
ENST00000007708	-0.0231898	0.955995	0.992607	990.875	948.857	PDK2
ENST00000007722	0.430385	0.654392	0.92906	818.667	1138.6	ITGA3
ENST00000007735	NA	NA	NA	NA	NA	KRT33A
ENST00000007969	-0.0407312	0.930829	0.986247	1118	1029.75	LRRC23
ENST00000008180	-0.206242	0.211589	0.750664	769.182	687.4	IL32
ENST00000008391	NA	NA	NA	NA	NA	TFAP2D
ENST00000008440	NA	NA	NA	1	1054	SPRTN
ENST00000008527	-0.165447	0.394794	0.849643	1716.46	1535.98	CRY1
ENST00000008938	NA	NA	NA	NA	NA	PGLYRP1
ENST00000009041	-0.0851148	0.277994	0.799759	1284.48	1227.34	STARD3NL
ENST00000009105	NA	NA	NA	1	295	CAMK1G
ENST00000009180	-0.0570024	0.809913	0.961878	855.259	793.724	CD9
ENST00000009530	NA	NA	NA	NA	NA	CD74
ENST00000009589	-0.0400425	0.0529821	0.535209	568.891	555.044	RPS20
ENST00000010132	-0.0703436	0.501506	0.887732	836.179	814.806	DYRK4
ENST00000010299	NA	NA	NA	NA	NA	FAM76A
ENST00000010404	-0.253513	1.57517e-05	0.014555	801.362	672.589	MGST1
ENST00000011292	NA	NA	NA	NA	NA	CPA1
ENST00000011473	-0.255943	0.0663267	0.57128	1323.79	1154.52	SYPL1
ENST00000011619	-0.350706	0.0104568	0.319221	1828.4	1489.69	RANBP9
ENST00000011653	NA	NA	NA	1	1748	CD4
ENST00000011684	NA	NA	NA	1	753	PLEKHG6
ENST00000011691	-0.135276	0.00731198	0.277911	740.726	685.645	SS18L2
ENST00000011898	0.192345	0.615349	0.919827	1382.25	1437.27	TSPAN9
ENST00000011989	NA	NA	NA	NA	NA	CYP4F2
ENST00000012049	-0.0105492	0.959027	0.992869	1147.61	1150.56	QPCTL
ENST00000012134	-0.348352	0.580248	0.909692	2056.46	1722	HIVEP2
ENST00000012443	-0.0861764	0.403873	0.852823	1652.24	1604.38	PPP5C
ENST00000013034	-0.858139	0.13433	0.685409	566.5	344.625	NME1
ENST00000013070	0.0474766	0.817036	0.963724	1913.23	2043.54	UBR7
ENST00000013125	-0.179993	0.225095	0.76212	1982.26	1854.42	MAP4K5
ENST00000013222	-0.388491	0.842849	0.968153	1863	2064.5	INMT
ENST00000013807	-0.065252	0.626059	0.921929	1121.89	1070.9	ERCC1
ENST00000014914	-0.187959	0.175473	0.721113	1679.76	1579.43	GPRC5A
ENST00000014930	-0.0105809	0.810834	0.962129	1036.75	1037.3	HEBP1
ENST00000016171	-0.133939	0.502764	0.887969	1798.69	1812.32	COX15
ENST00000016913	NA	NA	NA	NA	NA	MS4A12
ENST00000016946	-0.299107	0.427814	0.860713	2260.44	1671.12	RGPD5
ENST00000017003	0.153745	0.51928	0.891244	917.739	1059.21	XYLT2
ENST00000019019	-0.206197	0.10023	0.636278	1573.08	1434.78	FTSJ1
ENST00000019103	NA	NA	NA	NA	NA	SCTR
ENST00000019317	0.160662	0.514555	0.890351	1525.27	1686.82	RALBP1
ENST00000020673	NA	NA	NA	NA	NA	PSD
ENST00000020926	NA	NA	NA	2	991.5	SYT13
ENST00000020945	0.0849138	0.664837	0.929623	1382.76	1463.78	SNAI2
ENST00000022615	-0.063238	0.24425	0.775014	1226.55	1182.16	VDAC3
ENST00000023064	NA	NA	NA	NA	NA	SLC7A9
ENST00000023897	NA	NA	NA	NA	NA	GABRA1
ENST00000023939	-0.0577152	0.570395	0.906861	1373.73	1300.46	RTFDC1
ENST00000024061	-1.44048	0.290607	0.80552	2047.5	753	SLC45A4
ENST00000025008	-0.0412842	0.882582	0.976853	1580.62	1675.76	RB1CC1
ENST00000025301	-0.338797	0.155833	0.704006	2203	1757.9	AKAP11
ENST00000025399	-0.109132	0.81892	0.963724	863.4	839.727	STRAP
ENST00000026218	-1.01571	0.00758595	0.281555	1175.23	504.2	PIGQ
ENST00000027335	NA	NA	NA	NA	NA	CDH17
ENST00000029410	-0.170054	0.0701712	0.58094	1366.48	1266.53	B4GALT7
ENST00000031146	-0.166573	0.20805	0.747515	2349.58	2055.62	SLC39A9
ENST00000033079	-0.197978	0.307731	0.81219	1890.55	1831.5	FAM13B
ENST00000034275	0.189416	0.793507	0.958183	1587	1807	RANBP3
ENST00000035307	0.0991054	0.570913	0.907134	1806.82	1943.88	CHPF2
ENST00000035383	NA	NA	NA	NA	NA	LRRC7
ENST00000037243	-0.0704328	0.0359604	0.47601	965.443	929.297	GABARAPL2
ENST00000037502	NA	NA	NA	NA	NA	MYOC
ENST00000037869	-0.164169	0.0736157	0.587224	1382.05	1262.56	FAM136A
ENST00000038176	-0.304594	0.0590411	0.552085	1822.5	1529.29	NSMAF
ENST00000039007	NA	NA	NA	NA	NA	OTC
ENST00000039989	-0.248402	0.196558	0.737527	1990.28	1818.99	TTC17
ENST00000040584	NA	NA	NA	1880	1436.67	HOXC8
ENST00000040663	-0.167119	0.233308	0.766725	2051	1834.29	MRI1
ENST00000040738	-0.355622	0.306854	0.811572	1889.19	1706.64	BOD1L1
ENST00000040877	-0.288732	0.1223	0.669727	2246.45	1963.37	TARBP1
ENST00000042381	-0.195287	0.687943	0.936245	1669.8	1588.12	RIPOR1
ENST00000042931	NA	NA	NA	NA	NA	BEST2
ENST00000043402	0.0749504	0.77332	0.953717	1436.74	1496.81	RTN4R
ENST00000044462	-0.0589809	0.058147	0.551132	1120.27	1083.2	PSMA4
ENST00000045083	NA	NA	NA	NA	NA	RIPOR3
ENST00000045347	NA	NA	NA	NA	NA	SPATA7
ENST00000046087	NA	NA	NA	NA	NA	ZPBP
ENST00000046640	0.0149995	0.924411	0.985298	1977.09	2016.36	CTNS
ENST00000046794	NA	NA	NA	NA	NA	LCP2
ENST00000052569	-0.190144	0.309747	0.813039	2355.43	2129.55	GOPC
ENST00000052754	-1.17478	0.265838	0.792942	1676.5	909.667	DCN
ENST00000053243	NA	NA	NA	NA	NA	TNFRSF17
ENST00000053468	-0.23366	0.000100342	0.0393739	1323.39	1145.02	MRPS10
ENST00000053469	NA	NA	NA	NA	NA	GUCA1A
ENST00000053867	-0.162206	0.165644	0.710804	1669.37	1571.1	GRN
ENST00000054650	-0.0753864	0.637591	0.925507	1230.62	1177.25	THAP3
ENST00000054666	-0.118829	0.0661561	0.570796	1539.14	1465.96	VAMP3
ENST00000054668	NA	NA	NA	NA	NA	UTS2
ENST00000054950	-0.237875	0.00131486	0.129883	1597.46	1410.45	RCN1
ENST00000055077	-0.0865729	0.232176	0.76629	1440.74	1380.32	RFC2
ENST00000055335	-0.134594	0.808823	0.96174	1979.1	1960	PPP1R3F
ENST00000055682	NA	NA	NA	NA	NA	NEXMIF
ENST00000056217	-0.414417	0.38466	0.846238	2418	1788.05	ARHGEF5
ENST00000056233	-0.18941	0.709385	0.940559	1921.3	2172.08	NFE2L3
ENST00000057513	NA	NA	NA	1	1259	TNIP3
ENST00000060969	-0.038743	0.886295	0.977556	669.188	625.976	SIKE1
ENST00000061240	-0.132226	0.533858	0.897018	2063.6	1706.6	TLL1
ENST00000062104	NA	NA	NA	NA	NA	NNAT
ENST00000064571	NA	NA	NA	NA	NA	CBLN4
ENST00000064724	-0.713836	0.170638	0.716601	1593	970.2	CLDN11
ENST00000064778	-0.0683176	0.837804	0.967683	1936.94	2191.21	FAM168A
ENST00000064780	0.0308008	0.925301	0.985508	1710.91	1790.09	RELT
ENST00000066544	-0.161358	0.493832	0.884501	1613.08	1521.38	CDC27
ENST00000070846	NA	NA	NA	534	2448	PKP2
ENST00000072516	-1.52487	0.195312	0.737165	2107	971.25	IL1RAP
ENST00000072644	-0.314739	0.0146127	0.354394	1513.08	1312.04	YIPF1
ENST00000072869	-0.0520283	0.7997	0.959598	1642.84	1641.12	ADCK2
ENST00000074304	0.160058	0.774232	0.954051	2371.52	2628.67	INPP4A
ENST00000075120	-0.822048	0.146304	0.698334	2095.85	1387.5	SLC2A3
ENST00000075322	NA	NA	NA	NA	NA	ENPP2
ENST00000075430	-0.341816	0.0860385	0.612398	956.2	778.667	CTDP1
ENST00000075503	-0.323898	0.689612	0.936519	2128.67	2304.2	STYK1
ENST00000078429	-0.185948	0.604764	0.916394	1746.71	1744.2	GNA11
ENST00000078445	NA	NA	NA	2826	2386	CREB3L3
ENST00000078527	-0.0994327	0.668526	0.929675	1523.56	1498.88	PIGV
ENST00000080059	-0.00477879	0.9904	0.99725	1749.02	2174.52	HDAC7
ENST00000081029	-0.0598411	0.616629	0.920175	1420.51	1364.55	MRPS35
ENST00000083182	-0.214575	0.373651	0.84301	1833.45	1672.02	APPBP2
ENST00000084798	-0.0796307	0.749135	0.948805	1036.66	1072.18	CA11
ENST00000085068	-0.0854695	0.113708	0.656343	1019.01	976.368	ISOC2
ENST00000085079	0.0220886	0.848085	0.969605	879.342	888.042	EPN1
ENST00000085219	NA	NA	NA	NA	NA	CD22
ENST00000086933	NA	NA	NA	NA	NA	GSC2
ENST00000155093	NA	NA	NA	NA	NA	ZFY
ENST00000155674	-0.227834	0.184638	0.728707	1081.92	959.509	HDHD5
ENST00000155840	0.144622	0.912113	0.98342	1127.33	1478.42	KCNQ1
ENST00000155858	NA	NA	NA	NA	NA	TRPM5
ENST00000155926	NA	NA	NA	2	2640	TRIB2
ENST00000156084	0.0942168	0.757053	0.950047	1672.63	1813.71	OTUD5
ENST00000156109	-0.274052	0.00348572	0.200522	1400.62	1213.7	GPKOW
ENST00000156471	-0.292613	0.0914637	0.623359	2409.67	2018.87	AQR
ENST00000156499	NA	NA	NA	NA	NA	KLK14
ENST00000156626	NA	NA	NA	NA	NA	ST6GALNAC1
ENST00000156825	-0.142656	0.453277	0.870301	1586.66	1507.79	MBD3
ENST00000157600	0.0520759	0.434238	0.864089	1686	1741.8	LMCD1
ENST00000157812	-0.0761467	0.2974	0.808257	1326.44	1274.85	PSMC4
ENST00000158009	NA	NA	NA	NA	NA	FNDC8
ENST00000158166	NA	NA	NA	2011	1250	CAMKK1
ENST00000158762	0.856632	0.435972	0.865163	371	771.25	ACAP1
ENST00000158771	-0.15061	0.05591	0.54504	1104.77	1027.76	DERL2
ENST00000159060	NA	NA	NA	NA	NA	NOX3
ENST00000159087	0.0141439	0.967725	0.993741	1000.47	986.421	ANO8
ENST00000159111	0.234684	0.537979	0.898238	1178.71	1293.28	KDM4B
ENST00000159647	-0.110292	0.694413	0.937487	725.833	669.714	PANX2
ENST00000160262	-0.107182	0.384309	0.846238	949.356	854.583	ICAM3
ENST00000160298	NA	NA	NA	NA	NA	CAMSAP3
ENST00000160373	0.17351	0.659345	0.929079	1436.25	1576.08	CTTNBP2
ENST00000160382	NA	NA	NA	NA	NA	ACTL6B
ENST00000160740	0.41548	0.149672	0.700777	1187.91	1940.77	CIC
ENST00000160827	-0.14221	0.109099	0.65134	1253.63	1129.71	KIF22
ENST00000161006	NA	NA	NA	NA	NA	PRSS22
ENST00000161559	NA	NA	NA	1	1228	CEACAM1
ENST00000161863	-0.294465	0.321029	0.817792	2192.71	1861.47	YTHDC2
ENST00000162044	-0.00654385	0.953191	0.99217	1482.24	1477.58	TMEM161A
ENST00000162330	-0.27625	0.441018	0.865915	1675.69	1437.16	BCAR1
ENST00000162391	-0.428085	0.0804702	0.601061	1732.11	1398.41	FOXJ2
ENST00000162749	-0.118727	0.162407	0.709392	1529.61	1443.12	TNFRSF1A
ENST00000163416	-0.20145	0.315397	0.815127	1852.78	1689.84	GOLGA5
ENST00000164024	-0.458901	0.0664162	0.57128	2266.48	1602.26	CELSR3
ENST00000164133	-0.516125	0.21792	0.756129	1769.84	1443.23	PPP2R5B
ENST00000164139	NA	NA	NA	NA	NA	PYGM
ENST00000164227	-0.208117	0.128381	0.678356	1381.45	1276.78	BCL3
ENST00000164247	-1.84888	0.0503462	0.526915	3028	893.444	KCNAB2
ENST00000164305	-0.157817	0.23052	0.765416	1576.62	1469.82	PIGB
ENST00000164640	NA	NA	NA	2	1539	PDZD4
ENST00000165524	NA	NA	NA	NA	NA	PRLH
ENST00000165698	-0.95367	0.056838	0.546628	1690.44	975.733	REEP1
ENST00000166139	-0.0184237	0.877189	0.975552	1431.62	1443.09	FSTL3
ENST00000166244	NA	NA	NA	NA	NA	EPHA8
ENST00000166345	-0.194579	0.114748	0.657493	1648.87	1510.77	TRIP13
ENST00000166534	-0.0330487	0.941634	0.989113	1600.35	1386.06	P4HA2
ENST00000167106	0.0454534	0.953459	0.992196	1200.83	900.333	VASH1
ENST00000167462	-0.453451	0.497625	0.885371	2621.67	2117.5	LLGL2
ENST00000167586	-0.238883	0.67827	0.933746	1323.33	1113	KRT14
ENST00000167588	NA	NA	NA	1	3570	KRT20
ENST00000168148	NA	NA	NA	NA	NA	SPP2
ENST00000168216	-0.0940857	0.0663965	0.57128	951.034	907.735	HSD17B10
ENST00000168712	NA	NA	NA	NA	NA	FGF4
ENST00000168977	NA	NA	NA	NA	NA	NMRK2
ENST00000169293	NA	NA	NA	NA	NA	MASP1
ENST00000169298	NA	NA	NA	4194	4525	ST6GAL1
ENST00000169551	-0.0628871	0.47427	0.876757	1198.74	1152.88	TIMM21
ENST00000170150	NA	NA	NA	NA	NA	BPIFB2
ENST00000170168	-0.0404461	0.875289	0.97531	1714.72	1639.84	REXO1
ENST00000170447	-0.339105	0.00271166	0.181515	1825.57	1553.05	MKRN2
ENST00000170564	-0.454964	0.0584265	0.551247	1907.67	1511.91	GPATCH1
ENST00000170630	1.15387	0.080651	0.60175	745.5	1759.5	IL4R
ENST00000171111	-0.235077	0.151152	0.701408	1700.33	1522.97	KEAP1
ENST00000171757	NA	NA	NA	NA	NA	P2RY10
ENST00000171887	-0.389161	0.358599	0.835072	1700.6	1144.91	TNS1
ENST00000172229	NA	NA	NA	NA	NA	NGFR
ENST00000172853	NA	NA	NA	1	1273	NEB
ENST00000173229	NA	NA	NA	1	1350	NTN1
ENST00000173527	-0.149364	0.454249	0.870748	1494.83	1321.82	ISOC1
ENST00000173898	NA	NA	NA	NA	NA	TRO
ENST00000174618	0.115501	0.568596	0.906315	1422.32	1581.69	MNT
ENST00000174653	-1.04679	0.0222341	0.416306	1802.64	1130.47	AP3M2
ENST00000175091	-0.17788	0.00115841	0.124747	1203.81	1099.08	LAPTM4A
ENST00000175238	NA	NA	NA	NA	NA	ADAM7
ENST00000175506	-0.175972	0.184069	0.727901	1745.42	1571.56	ASNS
ENST00000175756	-0.516196	0.0235191	0.42243	1720.79	1330.3	PTPN18
ENST00000176183	NA	NA	NA	847	735	DRD4
ENST00000176195	NA	NA	NA	NA	NA	SCT
ENST00000176643	0.0825079	0.733905	0.945819	1787.31	1864.45	ALDH3A2
ENST00000176763	0.101564	0.810999	0.962129	1633.53	1743.3	STK10
ENST00000177648	-1.17145	0.0314124	0.460495	1126	513.4	ALPK1
ENST00000177694	NA	NA	NA	NA	NA	TBX21
ENST00000177742	-0.0548522	0.207126	0.746585	963.265	936.852	MRPS34
ENST00000178638	-0.207752	0.323171	0.819512	1998.99	1736.71	CA12
ENST00000178640	-0.0812828	0.64113	0.926365	1802.56	1712.61	MAP2K5
ENST00000179259	-0.0300241	0.663117	0.929345	1345.39	1308.36	TIGAR
ENST00000180166	NA	NA	NA	NA	NA	FGF20
ENST00000180173	NA	NA	NA	1171	1376	MTMR7
ENST00000181383	NA	NA	NA	NA	NA	CPB2
ENST00000181796	0.0131542	0.951777	0.991658	1534.14	1539.39	FAM107B
ENST00000181839	-0.0994426	0.806368	0.961401	2011.38	1965.02	CDK13
ENST00000182290	NA	NA	NA	NA	NA	TSPAN32
ENST00000182377	0.287995	0.575518	0.909149	943	1109	FAR2
ENST00000182527	-0.448972	0.0340016	0.469138	2289.98	1774.65	TRAM2
ENST00000183605	NA	NA	NA	NA	NA	CLDN18
ENST00000184183	NA	NA	NA	NA	NA	ROPN1
ENST00000184266	-0.0319176	0.0590886	0.552085	531.336	522.631	NDUFB4
ENST00000184956	-0.195489	0.461507	0.874177	2232.47	1882.18	HEATR6
ENST00000185150	-0.252801	0.0120643	0.336825	1756.81	1512.1	ERLEC1
ENST00000185206	NA	NA	NA	NA	NA	CLIC5
ENST00000186436	-0.426172	0.272839	0.79715	2333.67	1653.38	TMEM131
ENST00000187397	NA	NA	NA	NA	NA	ARPP21
ENST00000187608	NA	NA	NA	NA	NA	CEACAM21
ENST00000187762	-0.05282	0.828349	0.965356	1500.21	1393.59	TMEM38A
ENST00000187879	-0.381659	0.580305	0.909692	1345.33	1140.5	ZNF222
ENST00000187910	NA	NA	NA	1	869	PSG6
ENST00000188312	-0.135128	0.447032	0.867982	1457.38	1346.97	ACTR6
ENST00000188376	-0.0892646	0.000419745	0.0767096	1311.82	1260.48	SLC25A3
ENST00000188403	NA	NA	NA	NA	NA	NR1H4
ENST00000188790	0.440163	0.394442	0.849643	1611	2062	FAP
ENST00000189444	-0.0906227	0.687543	0.936245	2280.43	2210.04	NFKB2
ENST00000189978	NA	NA	NA	NA	NA	MUSK
ENST00000190165	NA	NA	NA	NA	NA	DMRT3
ENST00000190611	0.133332	0.789712	0.957258	1983	1984.5	OSBPL6
ENST00000190983	-0.0998498	0.132092	0.682375	1239.68	1185.93	WISP2
ENST00000191018	-0.094998	0.585968	0.910875	1415.55	1344.35	CTSA
ENST00000191063	NA	NA	NA	1	419	ANKRD16
ENST00000192314	NA	NA	NA	1	1370	GAL3ST2
ENST00000192788	-0.570227	0.173154	0.718043	2375.9	1738.21	UHRF1BP1
ENST00000193322	-0.287084	0.268528	0.793907	1677.23	1448.4	OSTM1
ENST00000193391	NA	NA	NA	NA	NA	IMPG2
ENST00000193403	-0.146041	0.722513	0.94336	1706.87	1748.91	ACTN1
ENST00000194097	1.54114	0.102344	0.640937	794.2	2291	NAIP
ENST00000194118	-0.195643	0.206786	0.746569	1840.93	1652.3	KIAA0141
ENST00000194130	NA	NA	NA	NA	NA	SLC13A1
ENST00000194152	NA	NA	NA	NA	NA	PCDHB4
ENST00000194155	-0.827855	0.488146	0.88213	2621.33	1838.67	PCDHB2
ENST00000194214	-0.0491317	0.0476452	0.519051	664.319	644.094	HSPB11
ENST00000194530	-0.222174	0.201808	0.742649	1850.98	1624.4	STRADB
ENST00000194900	-0.000315221	0.999223	0.999892	1498.85	1444.58	DLG3
ENST00000195173	NA	NA	NA	NA	NA	SEMA5B
ENST00000195649	NA	NA	NA	NA	NA	SNAP91
ENST00000196061	-0.205769	0.288919	0.805392	1853.74	1673.75	PLOD1
ENST00000196169	0.247906	0.351863	0.833411	1512.61	1519.64	TDRD3
ENST00000196371	-0.288259	0.000746345	0.104545	1856.87	1629.71	OXCT1
ENST00000196482	NA	NA	NA	956	946	ZNF324
ENST00000196489	-0.0597875	0.89277	0.978764	1666.72	1617.91	ZNF416
ENST00000196551	-0.0765267	0.00125982	0.128349	764.504	736.014	RPS5
ENST00000197268	0.0735183	0.860579	0.97201	1120.33	1150.33	FAM234B
ENST00000198536	NA	NA	NA	NA	NA	PILRA
ENST00000198767	-0.387315	0.011131	0.325997	2039.86	1678.11	RRN3
ENST00000198801	NA	NA	NA	NA	NA	MOGAT2
ENST00000198939	-0.344695	0.468932	0.874608	1965.43	1636.28	CHERP
ENST00000199280	NA	NA	NA	1	2325	AQP2
ENST00000199320	-0.174119	0.00535105	0.24433	1375.72	1245.73	DIMT1
ENST00000199389	-0.271731	0.110491	0.651858	1718.41	1521.58	EIF2AK1
ENST00000199447	NA	NA	NA	1	3598	NME8
ENST00000199448	-0.0308392	0.786877	0.957168	1566.16	1555.65	EPDR1
ENST00000199706	-0.0759833	0.292371	0.80586	1008.06	977.562	MRPL28
ENST00000199708	0.0842374	0.470966	0.875136	577.6	615.333	HBQ1
ENST00000199764	NA	NA	NA	NA	NA	CEACAM6
ENST00000199814	-0.138505	0.341413	0.827235	1596.28	1483.25	RBM22
ENST00000199936	NA	NA	NA	NA	NA	HSD17B2
ENST00000199940	-0.934426	0.466662	0.874608	2002	1482.17	MAP2
ENST00000200135	-0.24494	0.193804	0.736179	1861.75	1698.88	ZW10
ENST00000200181	-0.0805244	0.889859	0.978113	2335.63	2439.16	ITGB4
ENST00000200453	-0.135697	0.628639	0.922119	1339.21	1351.91	PPP1R15A
ENST00000200457	-0.109896	0.249083	0.779101	1208.82	1156.46	TRIP6
ENST00000200557	0.355	0.719414	0.94245	1696	1947.67	ADAM11
ENST00000200639	-0.103442	0.12846	0.678356	1391.78	1305.41	LAMP2
ENST00000200652	-0.081223	0.647707	0.927401	1449.54	1397.97	SLC22A4
ENST00000200676	NA	NA	NA	1	1723	CETP
ENST00000200691	NA	NA	NA	1	464	MT3
ENST00000201015	-1.21828	0.0446413	0.508615	1389.33	554.667	PTHLH
ENST00000201031	NA	NA	NA	1	793	TFAP2C
ENST00000201586	NA	NA	NA	NA	NA	SULT2B1
ENST00000201647	0.744323	0.404981	0.853128	1157	1526.33	EPS8L1
ENST00000201943	NA	NA	NA	NA	NA	CACNB4
ENST00000201963	-0.23076	0.824607	0.965274	1887	1762.33	DNMT3B
ENST00000201979	NA	NA	NA	NA	NA	REM1
ENST00000202017	-0.0752712	0.458125	0.872979	1150.44	1103.95	PDRG1
ENST00000202028	0.617255	0.162653	0.709576	1035.25	1286.09	EPB41L1
ENST00000202556	0.299205	0.737325	0.946814	1402.25	1251.17	PPP1R13B
ENST00000202625	NA	NA	NA	NA	NA	TGM6
ENST00000202677	-0.566663	0.717091	0.941892	4643.5	4831	RALGAPA2
ENST00000202773	-0.0682811	0.0154109	0.362582	919.537	886.715	RPL6
ENST00000202816	-0.0269596	0.90771	0.982592	1415.43	1407.69	ESF1
ENST00000202831	-1.48054	0.0140953	0.3505	1829.5	728.5	SLC8B1
ENST00000202834	-0.198923	0.125103	0.673396	1318.23	1180.42	TMEM230
ENST00000202917	-0.499315	0.518825	0.891244	1192.14	1224.86	OAS1
ENST00000202967	-0.106747	0.781321	0.955596	1012.5	920.667	SIRT4
ENST00000203001	-0.308825	0.115829	0.659162	1707.33	1530.28	TRMT6
ENST00000203166	-0.252498	0.38613	0.846238	1593.38	1523.99	HAUS5
ENST00000203407	-0.114609	0.198298	0.738686	1361.89	1280.71	UQCRC1
ENST00000203556	0.0870103	0.841203	0.967877	1402.78	1709.97	GMIP
ENST00000203629	-1.65197	0.194547	0.736848	2891	1011.67	LAG3
ENST00000203630	-0.049541	0.574286	0.908481	1258.24	1235.55	MLF2
ENST00000203664	0.377352	0.405006	0.853128	1889.6	2359.83	OTUB2
ENST00000204005	0.110059	0.713288	0.940999	1533.71	1748.03	LTBP4
ENST00000204517	-0.16741	0.420394	0.858379	1389.57	1353.91	TFAP4
ENST00000204549	-0.464226	0.0238784	0.42384	1590.16	1308.8	PDCD7
ENST00000204566	-0.157442	0.0334977	0.466476	1488.84	1390.64	SPG21
ENST00000204604	NA	NA	NA	1	1463	CHRD
ENST00000204615	NA	NA	NA	NA	NA	THPO
ENST00000204637	NA	NA	NA	3	1064.67	FLT3LG
ENST00000204679	0.0374437	0.809483	0.961842	1061.66	1071.76	GNPTG
ENST00000204726	-0.676413	0.00884849	0.297959	1449.31	922.088	GOLGA3
ENST00000204801	NA	NA	NA	NA	NA	CD209
ENST00000204961	-0.185688	0.586178	0.910875	1705.31	1357.96	EFNB1
ENST00000205061	-0.254152	0.147204	0.698785	2012.03	1714.83	GLG1
ENST00000205143	-0.047728	0.650075	0.928147	632	620.964	DLL3
ENST00000205194	-0.128436	0.167688	0.712932	1121.47	1031.15	NAT14
ENST00000205214	0.407479	0.469275	0.874608	2508.83	2886.4	AASDH
ENST00000205386	NA	NA	NA	NA	NA	LAMB4
ENST00000205402	-0.215089	0.103648	0.642307	1703.73	1481.22	DLD
ENST00000205557	NA	NA	NA	1813	1462	ABCC6
ENST00000205636	-0.299252	0.241239	0.772705	1884.45	1696.68	CMTM6
ENST00000205890	NA	NA	NA	NA	NA	MYO15A
ENST00000205948	NA	NA	NA	NA	NA	APOH
ENST00000206020	-0.0825729	0.0303693	0.456735	1038.4	989.579	SPAG7
ENST00000206249	NA	NA	NA	NA	NA	ESR1
ENST00000206262	NA	NA	NA	1	942	RGS17
ENST00000206380	-0.0929527	0.581208	0.909979	1148.56	1098.56	TMEM101
ENST00000206423	-0.344036	0.202212	0.74327	1981.17	1617.73	CCDC80
ENST00000206446	NA	NA	NA	NA	NA	CMA1
ENST00000206451	-0.0647138	0.345154	0.830278	954.615	928.699	PSME1
ENST00000206474	-0.0453377	0.839194	0.967877	1290.25	1297.78	HAUS4
ENST00000206513	NA	NA	NA	NA	NA	CEBPE
ENST00000206542	-0.10371	0.221686	0.759047	1132.35	1087.79	OSGEP
ENST00000206544	NA	NA	NA	NA	NA	SLC22A17
ENST00000206595	-0.0656068	0.685007	0.935616	1796.45	1801.24	G2E3
ENST00000206765	-0.155028	0.724311	0.94421	1560.25	1520.11	TGM1
ENST00000207157	1.51378	0.017722	0.387464	711.667	1824.5	TBX15
ENST00000207457	NA	NA	NA	NA	NA	TEKT2
ENST00000207549	0.00222782	0.985109	0.996203	1909.03	1968.3	UNC13D
ENST00000207870	0.0375169	0.940822	0.988877	1585	1717.14	XYLB
ENST00000209540	NA	NA	NA	NA	NA	OR1I1
ENST00000209665	NA	NA	NA	NA	NA	ADH7
ENST00000209668	NA	NA	NA	NA	NA	ADH1A
ENST00000209718	0.287994	0.336102	0.824921	789.667	939	KRT23
ENST00000209728	-0.0869639	0.641195	0.926365	1627.12	1547.56	CDC6
ENST00000209873	-0.0945537	0.358776	0.835072	1516.2	1461.62	AAAS
ENST00000209875	-0.242418	0.00424968	0.224807	1492.45	1287.73	CBX5
ENST00000209884	0.158952	0.463389	0.874177	1876.11	2072.27	KLHL20
ENST00000209929	NA	NA	NA	NA	NA	FMO2
ENST00000210060	-0.161978	0.0225132	0.417613	1176.57	1093.87	DHPS
ENST00000210187	-0.220937	0.111446	0.652423	1312.87	1188.16	RAB26
ENST00000210313	-0.17923	0.0383599	0.483676	1773.78	1622.76	PSMD5
ENST00000210444	-0.11781	0.00475376	0.235263	1086.94	1022.98	NANS
ENST00000210633	-0.537238	0.550521	0.901535	2019.33	1267.33	SEMA4G
ENST00000211076	NA	NA	NA	NA	NA	TPSD1
ENST00000211122	NA	NA	NA	NA	NA	GSTA3
ENST00000211287	0.131404	0.528257	0.894346	1802.5	1970	MAPK13
ENST00000211314	-0.0485063	0.433854	0.863905	913.6	878.303	TMEM14A
ENST00000211379	-0.0910686	0.633524	0.924118	1797.78	1820.78	BAG6
ENST00000211413	0.217959	0.773475	0.953717	897.25	1075	PRRT1
ENST00000211921	NA	NA	NA	NA	NA	LST1
ENST00000211936	-0.0854588	0.751301	0.948843	2122.42	1951.32	ZNF184
ENST00000211998	-0.0842855	0.728338	0.944847	2282.02	2126.47	VCL
ENST00000212015	-0.227846	0.484801	0.881589	2394.88	2140.38	SIRT1
ENST00000212355	0.276409	0.313518	0.814481	1829	2254.38	TGFBR3
ENST00000214869	-0.216887	0.0159231	0.369625	1201.51	1072.67	TMED1
ENST00000215057	0.0137089	0.961686	0.993355	1925.58	2012.63	MZF1
ENST00000215061	-0.124569	0.151189	0.701408	1019.16	958.163	OCEL1
ENST00000215071	-0.0929144	0.165724	0.710804	990.218	947.452	PSMD8
ENST00000215095	NA	NA	NA	1	1046	STX1B
ENST00000215115	0.00655426	0.946014	0.990128	728.326	736.526	BCL7C
ENST00000215368	NA	NA	NA	1	1322	EFNA2
ENST00000215375	-0.0381866	0.435487	0.865021	812.272	799.666	ATP5D
ENST00000215473	NA	NA	NA	NA	NA	PCDH11Y
ENST00000215479	NA	NA	NA	NA	NA	AMELY
ENST00000215530	NA	NA	NA	897	928.5	FGF22
ENST00000215531	NA	NA	NA	1	737	SMIM24
ENST00000215539	NA	NA	NA	NA	NA	IGFALS
ENST00000215555	0.0126391	0.690371	0.936695	1406.25	1422.25	2023-03-02
ENST00000215565	-0.0312565	0.31102	0.813903	585.098	571.787	NDUFB7
ENST00000215567	-0.0956362	0.156108	0.704006	1017.03	969.427	TECR
ENST00000215570	-0.0632458	0.0259619	0.429582	742.162	717.821	TIMM13
ENST00000215574	-0.106756	0.441586	0.866147	1142.92	1079.33	CDC34
ENST00000215582	-0.16507	0.371986	0.842721	1557.91	1485.61	MISP
ENST00000215631	-0.0864789	0.47951	0.879527	1024.45	975.884	GADD45B
ENST00000215637	NA	NA	NA	NA	NA	MADCAM1
ENST00000215659	-0.111296	0.253529	0.782143	1625.5	1558.37	MAPK12
ENST00000215727	NA	NA	NA	NA	NA	SERPIND1
ENST00000215730	-0.121796	0.318706	0.816793	1300.82	1124.82	SNAP29
ENST00000215739	0.126699	0.606255	0.916631	1558.23	1711.41	LZTR1
ENST00000215742	-0.154952	0.500674	0.887158	1068.83	1035.63	THAP7
ENST00000215743	-1.00546	0.197724	0.738686	1740	949.333	MMP11
ENST00000215754	-0.0312435	0.147917	0.699188	581.167	571.578	MIF
ENST00000215770	-0.525194	0.130685	0.680471	836.294	677.455	DDTL
ENST00000215781	NA	NA	NA	NA	NA	OSM
ENST00000215790	-0.327051	0.60697	0.916819	1289.23	1346.06	TBC1D10A
ENST00000215793	-0.115013	0.567512	0.906315	1800.7	1789.3	SF3A1
ENST00000215794	0.557879	0.0656318	0.570049	1591.43	2278	USP18
ENST00000215812	NA	NA	NA	NA	NA	SEC14L3
ENST00000215829	-0.0323949	0.149767	0.700777	683.491	668.818	SNRPD3
ENST00000215832	-0.198052	0.0969816	0.630183	2181.94	1908.55	MAPK1
ENST00000215838	NA	NA	NA	1536.5	2039.5	TCN2
ENST00000215855	NA	NA	NA	NA	NA	CRYBB3
ENST00000215862	-0.0431313	0.876219	0.975538	1426.62	1459.83	MORC2
ENST00000215882	-0.103635	0.377161	0.844579	1283.48	1229.25	SLC25A1
ENST00000215885	NA	NA	NA	2482.5	567	PLA2G3
ENST00000215886	NA	NA	NA	NA	NA	LGALS2
ENST00000215904	-0.22933	0.178624	0.72342	1706.78	1589.49	PDXP
ENST00000215906	-1.45091	0.111196	0.652192	1626.83	625.333	ASPHD2
ENST00000215909	-0.0253296	0.0387346	0.483676	576.055	569.352	LGALS1
ENST00000215912	-0.216871	0.644887	0.926854	1832.44	1471.5	PIK3IP1
ENST00000215917	-0.109076	0.304388	0.811415	1362.42	1326.67	SRRD
ENST00000215919	-0.0674844	0.750029	0.948805	1711.96	1642.88	PATZ1
ENST00000215939	NA	NA	NA	NA	NA	CRYBB1
ENST00000215941	-0.0550565	0.809206	0.961746	1460.55	1436.3	ANKRD54
ENST00000215956	-0.0786807	0.526698	0.894261	869.133	846.767	SNU13
ENST00000215957	0.118129	0.438586	0.865915	1730.37	1870.14	MICALL1
ENST00000215980	-0.0122846	0.703931	0.939896	935.731	930.003	CENPM
ENST00000216014	-0.219678	0.0695398	0.579077	1325.42	1177.22	KDELR3
ENST00000216024	NA	NA	NA	713.667	1195	DMC1
ENST00000216027	-0.0171178	0.856623	0.971984	914.27	912.141	HSCB
ENST00000216029	0.00355944	0.978286	0.995206	995.93	989.554	CBY1
ENST00000216034	-0.0769865	0.153329	0.703163	962.979	921.31	TOMM22
ENST00000216036	NA	NA	NA	NA	NA	RSPH14
ENST00000216037	-0.247286	0.00328757	0.197426	1487.41	1313.75	XBP1
ENST00000216038	-0.184556	0.155253	0.703163	1445.01	1352.25	RTCB
ENST00000216039	-0.257116	0.0807148	0.601789	2061.02	1738.86	JOSD1
ENST00000216044	-0.242532	0.355084	0.834608	1772.05	1482.21	GTPBP1
ENST00000216061	-0.435497	0.24836	0.77856	1702.3	1350.12	PPP6R2
ENST00000216068	0.07237	0.760116	0.950859	1067.44	1114.41	DNAL4
ENST00000216071	NA	NA	NA	NA	NA	C22orf31
ENST00000216075	NA	NA	NA	NA	NA	MIOX
ENST00000216080	-0.220281	0.152027	0.701408	1835.96	1671	LMF2
ENST00000216083	-0.96272	0.0698438	0.579906	1898.88	1086.56	CBX6
ENST00000216085	-0.212061	0.510242	0.889651	1235.05	1197.56	RHBDD3
ENST00000216099	NA	NA	NA	NA	NA	APOBEC3D
ENST00000216101	NA	NA	NA	NA	NA	RASL10A
ENST00000216106	-0.428329	0.297178	0.807927	2279.54	1966.67	HMGXB4
ENST00000216115	NA	NA	NA	3	999.333	BIK
ENST00000216117	-0.122587	0.372966	0.842761	1276.76	1212.21	HMOX1
ENST00000216121	-0.224089	0.0812202	0.60339	1462.92	1339.45	NIPSNAP1
ENST00000216122	-0.194155	0.12493	0.673272	1881.67	1717.7	MCM5
ENST00000216124	-0.0445838	0.852002	0.970962	1539.34	1490.45	ARSA
ENST00000216127	NA	NA	NA	1	633	RASD2
ENST00000216129	-0.193594	0.508774	0.889399	1558.52	1517	TTLL12
ENST00000216133	-0.449949	0.425356	0.859553	1606.5	1260.25	CBX7
ENST00000216139	NA	NA	NA	1	841	ACR
ENST00000216144	-0.827185	0.0358614	0.475799	754	431	CABP7
ENST00000216146	-0.0852053	0.122365	0.669748	1229.26	1181.82	RPL3
ENST00000216155	NA	NA	NA	NA	NA	SYNGR1
ENST00000216160	-0.0861735	0.783696	0.956539	1566.56	1473.86	TAB1
ENST00000216177	NA	NA	NA	NA	NA	PNPLA5
ENST00000216180	-1.14899	0.592182	0.913117	1369.67	728.5	PNPLA3
ENST00000216181	-0.216827	0.394976	0.84966	1616.35	1585.77	MYH9
ENST00000216185	-0.0473986	0.261585	0.789053	1096.35	1074.87	TXN2
ENST00000216187	-1.04762	0.162888	0.709663	1842.29	984.308	FOXRED2
ENST00000216190	-0.165238	0.146357	0.698334	1517.96	1428.17	EIF3D
ENST00000216194	-0.0539554	0.499131	0.886136	763.43	738.428	ADSL
ENST00000216200	NA	NA	NA	NA	NA	PVALB
ENST00000216211	NA	NA	NA	NA	NA	UPK3A
ENST00000216214	-0.332979	0.124952	0.673272	1749.24	1400.69	FAM118A
ENST00000216218	-0.177545	0.0299292	0.453994	1415.12	1263.96	ST13
ENST00000216223	NA	NA	NA	NA	NA	IL2RB
ENST00000216225	-0.054021	0.0218462	0.413879	589.284	567.876	RBX1
ENST00000216237	-0.259987	0.019728	0.397132	1947.73	1647.61	L3MBTL2
ENST00000216241	NA	NA	NA	NA	NA	CHADL
ENST00000216252	-0.0833025	0.318334	0.816691	940.386	917.913	PHF5A
ENST00000216254	-0.228248	0.227544	0.764952	1857.62	1650.99	ACO2
ENST00000216259	-0.0212558	0.813213	0.962662	1087.13	1081.29	PMM1
ENST00000216264	-0.464184	0.0971735	0.63033	1967.06	1564.58	CERK
ENST00000216267	0.541493	0.172138	0.717693	1050.73	1608.86	BRD1
ENST00000216268	0.273455	0.561197	0.90311	1912.41	2345.63	ZBED4
ENST00000216271	0.219069	0.231214	0.766006	1427.65	1672.34	HDAC10
ENST00000216274	NA	NA	NA	NA	NA	RIPK3
ENST00000216277	-0.217262	0.0745067	0.588594	1997.46	1730.56	PAPOLA
ENST00000216281	-0.234766	0.0249488	0.427775	1768.37	1573.68	HSP90AA1
ENST00000216286	-0.235883	0.734081	0.945894	2415.67	2040.33	NID2
ENST00000216288	-1.05074	0.106588	0.64803	1282.5	532.167	MARK3
ENST00000216294	-0.0534259	0.755775	0.94971	1419.23	1410.42	SNAPC1
ENST00000216297	-0.174886	0.295475	0.806699	1793.34	1632.62	SUPT16H
ENST00000216327	NA	NA	NA	NA	NA	ABHD4
ENST00000216330	-0.03781	0.558245	0.902629	951.588	933.782	FKBP3
ENST00000216336	NA	NA	NA	NA	NA	CTSG
ENST00000216338	NA	NA	NA	NA	NA	GZMH
ENST00000216341	NA	NA	NA	NA	NA	GZMB
ENST00000216350	-0.150698	0.383671	0.846238	1173.33	1060.14	PRMT5
ENST00000216361	0.326739	0.0542024	0.538173	1943.86	2292.73	COCH
ENST00000216366	-1.00557	0.228966	0.765313	1924	1077.5	AP4S1
ENST00000216367	-0.010988	0.924642	0.985319	1319.93	1337.9	POLE2
ENST00000216373	-0.477225	0.201807	0.742649	2314.62	1821.39	SOS2
ENST00000216378	-0.816934	0.312057	0.814086	1210.5	824	CDKL1
ENST00000216392	-0.105497	0.364253	0.837872	2169.08	2059.96	PYGL
ENST00000216410	-0.041576	0.782516	0.956034	1126.62	1150.26	GNPNAT1
ENST00000216416	-0.0575757	0.359503	0.835072	1264.83	1206.89	CNIH1
ENST00000216420	-0.223667	0.258741	0.786533	1408.56	1185.47	CGRRF1
ENST00000216442	-0.149941	0.00955099	0.307531	1323.41	1211.93	ATP6V1D
ENST00000216445	NA	NA	NA	NA	NA	CCDC198
ENST00000216446	-0.363115	0.00338742	0.1983	1295.99	1108.04	PLEK2
ENST00000216452	0.0116118	0.921441	0.984435	1128.48	1133.51	PIGH
ENST00000216455	-0.0493776	0.0671711	0.572357	947.667	921.804	PSMA3
ENST00000216465	-0.0776798	0.199649	0.740222	1090.46	1056.71	GSTZ1
ENST00000216468	-0.189197	0.411956	0.855727	2157.61	1965.26	TMED8
ENST00000216471	NA	NA	NA	1215	2390.5	SAMD15
ENST00000216479	-0.117612	0.100986	0.637242	1195.84	1122.95	AHSA1
ENST00000216484	-0.765938	0.000488484	0.0830132	1979.14	1331.16	SPTLC2
ENST00000216487	-0.0500967	0.941812	0.989209	2190.12	2296.09	RIN3
ENST00000216489	0.116707	0.474164	0.876757	1408.82	1522.02	ALKBH1
ENST00000216492	NA	NA	NA	NA	NA	CHGA
ENST00000216500	-0.0190948	0.898405	0.980063	1171.4	1160.62	DHRS7
ENST00000216513	-0.0629437	0.861813	0.972451	1815.4	1861.57	SIX4
ENST00000216517	NA	NA	NA	NA	NA	CEP128
ENST00000216540	NA	NA	NA	NA	NA	SLC10A1
ENST00000216554	-0.32148	0.0194387	0.394697	2170.3	1817.97	EIF5
ENST00000216568	NA	NA	NA	1	345	SLC8A3
ENST00000216602	-0.245345	0.127115	0.674924	1274.68	1116.4	ZFYVE21
ENST00000216605	-0.249376	0.0962865	0.629279	2038.8	1800.03	MTHFD1
ENST00000216629	-0.543267	0.160001	0.706201	1439.14	1137.83	BDKRB1
ENST00000216639	-0.220654	0.234352	0.767154	1418.66	1271.41	VRK1
ENST00000216714	-0.0226931	0.700202	0.938843	1347.04	1323.94	APEX1
ENST00000216727	-0.0745409	0.763502	0.951621	1150.98	1144.7	PABPN1
ENST00000216733	NA	NA	NA	NA	NA	EFS
ENST00000216756	-0.106924	0.0119802	0.336775	929.895	884.629	CINP
ENST00000216774	0.0421076	0.860717	0.97201	1485.03	1441.28	SRP54
ENST00000216780	-0.121254	0.604905	0.916394	1680.66	1634.51	PCK2
ENST00000216797	-0.129514	0.0892011	0.619633	1315.76	1235.77	NFKBIA
ENST00000216799	-0.364681	0.0965839	0.629368	829.182	703.5	EMC9
ENST00000216802	-0.0661077	0.165639	0.710804	829.042	808.451	PSME2
ENST00000216807	0.102359	0.594118	0.913675	1460.68	1563.6	BRMS1L
ENST00000216832	-0.170401	0.0488158	0.522834	1376	1280.38	PNN
ENST00000216840	-0.0302147	0.862269	0.972594	1471.87	1465.28	RABGGTA
ENST00000216862	-0.76984	0.305291	0.811494	2191.85	1759.5	CYP24A1
ENST00000216877	0.0239367	0.962804	0.993534	1728.83	1802	PTPRA
ENST00000216879	-0.189785	0.272126	0.796468	1493.52	1227.71	NSFL1C
ENST00000216923	-0.739994	0.275296	0.798586	2215.76	1931.47	ZFP64
ENST00000216927	NA	NA	NA	NA	NA	SIRPG
ENST00000216951	-0.220795	0.0287974	0.445869	1559.08	1393.7	GSS
ENST00000216962	0.0319717	0.927986	0.985994	1822.93	1880.94	PYGB
ENST00000216968	-0.0830101	0.478627	0.879074	1162.68	1134.49	PROCR
ENST00000217026	-0.27055	0.278343	0.799964	1969.26	1813.37	MYBL2
ENST00000217043	NA	NA	NA	NA	NA	R3HDML
ENST00000217073	NA	NA	NA	NA	NA	PABPC1L
ENST00000217074	NA	NA	NA	NA	NA	PABPC1L
ENST00000217075	NA	NA	NA	NA	NA	PABPC1L
ENST00000217086	-0.066968	0.89126	0.97837	1292.93	1277.45	SALL4
ENST00000217109	-0.0214755	0.864582	0.973448	1440.47	1392.65	CSTF1
ENST00000217121	-0.16102	0.3273	0.820618	1808.23	1692.13	TPD52L2
ENST00000217131	-0.147889	0.115292	0.658755	1203.87	1132.06	CTSZ
ENST00000217133	NA	NA	NA	1846	2052	TUBB1
ENST00000217159	0.027182	0.961245	0.993355	1865.15	2056.4	SLCO4A1
ENST00000217162	0.171575	0.75999	0.950859	1901.53	2117.86	TCFL5
ENST00000217169	NA	NA	NA	NA	NA	BIRC7
ENST00000217173	-0.276241	0.523377	0.892814	2000.67	1767.6	UBOX5
ENST00000217182	-0.0176693	0.846013	0.968674	1470.1	1476.42	EEF1A2
ENST00000217185	-0.335028	0.844422	0.968468	1296	1313.75	PTK6
ENST00000217188	NA	NA	NA	NA	NA	SRMS
ENST00000217195	-0.123377	0.350514	0.833124	974.813	917.481	C20orf27
ENST00000217233	-0.0893225	0.753392	0.949128	1571.31	1542.48	TRIB3
ENST00000217244	-0.345425	0.00618405	0.259359	1865.23	1526.51	CSNK2A1
ENST00000217246	0.287199	0.761611	0.951229	1664	1877	MACROD2
ENST00000217254	NA	NA	NA	NA	NA	SLC52A3
ENST00000217260	NA	NA	NA	NA	NA	RSPO4
ENST00000217270	NA	NA	NA	NA	NA	PROKR2
ENST00000217289	-0.463551	0.0594498	0.552982	2243.06	1776.26	FERMT1
ENST00000217305	NA	NA	NA	NA	NA	PDYN
ENST00000217315	-0.331997	0.0787648	0.5969	1850.58	1630.45	TM9SF4
ENST00000217320	NA	NA	NA	NA	NA	TLDC2
ENST00000217381	-0.198913	0.254478	0.783314	1597.38	1463.22	SNTA1
ENST00000217386	NA	NA	NA	NA	NA	OXT
ENST00000217398	0.133169	0.420971	0.858699	786.833	834	PXMP4
ENST00000217402	-0.086225	0.383624	0.846238	1087.95	1055.38	CHMP4B
ENST00000217407	NA	NA	NA	NA	NA	LBP
ENST00000217420	NA	NA	NA	NA	NA	SLC32A1
ENST00000217423	NA	NA	NA	NA	NA	CST4
ENST00000217425	NA	NA	NA	NA	NA	WFDC2
ENST00000217426	-0.169482	0.168467	0.713827	1611.71	1489.08	AHCY
ENST00000217428	NA	NA	NA	NA	NA	SPINT3
ENST00000217455	-0.0998614	0.108462	0.650617	990	938.202	ACOT8
ENST00000217456	-0.195024	0.1059	0.647354	1661.95	1488.32	APMAP
ENST00000217515	-0.0880283	0.225718	0.762913	1192.52	1134.41	TXNL1
ENST00000217652	-0.046212	0.296053	0.806893	947.164	925.607	MYL12A
ENST00000217740	NA	NA	NA	1	1453	RNF125
ENST00000217885	NA	NA	NA	NA	NA	NOX1
ENST00000217893	-0.0483373	0.426055	0.859553	1155.15	1129.25	TAF9
ENST00000217901	-0.126283	0.25668	0.785557	1185.29	1086.91	IDH3G
ENST00000217909	-0.302425	0.247226	0.778047	1882.89	1617.63	SLC25A43
ENST00000217926	NA	NA	NA	NA	NA	H2BFWT
ENST00000217939	NA	NA	NA	NA	NA	MXRA5
ENST00000217957	NA	NA	NA	NA	NA	VSIG1
ENST00000217958	-0.162596	0.0905938	0.622377	1273.85	1147.51	PSMD10
ENST00000217961	-0.398212	0.0446233	0.508615	2157.77	1730.88	STS
ENST00000217964	-0.483383	0.0373482	0.481458	2500.93	2049.98	TBL1X
ENST00000217971	-0.123123	0.0737414	0.587246	1512.17	1407.06	PGRMC1
ENST00000217999	NA	NA	NA	NA	NA	RHOXF1
ENST00000218004	-0.474197	0.22274	0.760441	1924.75	1244.83	NXT2
ENST00000218006	NA	NA	NA	1	1492	GUCY2F
ENST00000218008	NA	NA	NA	NA	NA	ATP1B4
ENST00000218032	NA	NA	NA	NA	NA	TLR8
ENST00000218056	0.0116698	0.956996	0.992607	1392.17	1418.39	WDR13
ENST00000218068	NA	NA	NA	NA	NA	PAGE4
ENST00000218075	NA	NA	NA	NA	NA	GLRA2
ENST00000218089	-0.0663689	0.873263	0.97505	2264.33	2358.59	STAG2
ENST00000218099	NA	NA	NA	NA	NA	F9
ENST00000218104	-0.112263	0.733065	0.945459	1769.85	1755.45	ABCD1
ENST00000218147	1.3845	0.03959	0.485986	1079	2781.75	BCORL1
ENST00000218176	NA	NA	NA	3	2732	KCND1
ENST00000218197	-1.295	0.0185306	0.389129	1637.25	647.333	SLC25A14
ENST00000218200	0.0918884	0.735985	0.946443	2152.38	2217.77	FMR1
ENST00000218224	0.0572821	0.599712	0.915029	658.17	664.14	PQBP1
ENST00000218230	NA	NA	NA	NA	NA	PCSK1N
ENST00000218249	NA	NA	NA	NA	NA	RAB40AL
ENST00000218316	NA	NA	NA	NA	NA	GPR50
ENST00000218340	-0.241876	0.393293	0.849089	1930.76	1570.94	RP2
ENST00000218348	-0.154441	0.411153	0.855218	1759.76	1645.58	USP11
ENST00000218364	-0.0393247	0.785159	0.956886	998.153	1007.7	HTATSF1
ENST00000218388	-0.0295064	0.338614	0.826341	827.844	814.142	TIMP1
ENST00000218432	-0.00837709	0.75777	0.950364	514.656	513.186	PIN4
ENST00000218436	NA	NA	NA	NA	NA	ITIH6
ENST00000218439	NA	NA	NA	1495	2321	MAGED2
ENST00000218516	-0.148779	0.0448719	0.50949	1243.21	1153.68	GLA
ENST00000218548	NA	NA	NA	NA	NA	ATP12A
ENST00000218652	-0.198186	0.204369	0.744655	1755.85	1583.95	NDFIP2
ENST00000218721	NA	NA	NA	NA	NA	MLNR
ENST00000218758	NA	NA	NA	NA	NA	ACP5
ENST00000218789	0.104884	0.736552	0.946528	2995.05	3094.42	ARHGEF7
ENST00000218867	NA	NA	NA	NA	NA	SGCG
ENST00000218981	0.49485	0.485027	0.881589	881.25	959.5	DHRS12
ENST00000219022	NA	NA	NA	NA	NA	OLFM4
ENST00000219054	NA	NA	NA	NA	NA	ACSM2A
ENST00000219066	-0.0607419	0.583402	0.910426	940.608	919.48	NTHL1
ENST00000219069	-0.277883	0.146098	0.698334	2196.95	1889.78	ZNF263
ENST00000219070	-0.148775	0.546885	0.900939	2115.44	1978.8	MMP2
ENST00000219091	-0.816815	0.518313	0.891021	1013.17	682	ZNF205
ENST00000219097	-0.245796	0.321683	0.818199	1306.25	1194.02	ORC6
ENST00000219139	-0.142351	0.514849	0.890455	1643.96	1563.85	C16orf70
ENST00000219150	NA	NA	NA	1056	1150.67	CORO1A
ENST00000219162	NA	NA	NA	NA	NA	MT4
ENST00000219168	-0.039591	0.69483	0.937487	1334.74	1309.26	LYRM1
ENST00000219169	-0.100957	0.00416767	0.22273	905.687	849.928	NUTF2
ENST00000219197	NA	NA	NA	NA	NA	CBLN1
ENST00000219204	-0.140396	0.0475318	0.519051	1654.74	1538.3	ARL2BP
ENST00000219207	-0.210539	0.787872	0.957168	1055.75	828.333	PLLP
ENST00000219235	NA	NA	NA	2496	879	CCL22
ENST00000219240	-0.116851	0.434142	0.864089	1409.62	1383.26	DHODH
ENST00000219244	NA	NA	NA	NA	NA	CCL17
ENST00000219251	-0.158982	0.650251	0.928259	889.565	878.952	ACD
ENST00000219252	-0.134467	0.190388	0.734303	1350.02	1263.38	POLR2C
ENST00000219255	-0.0549619	0.859273	0.971984	1214.6	1150.56	PARD6A
ENST00000219271	0.289129	0.391095	0.847622	1575.55	1877	MMP15
ENST00000219281	-0.0773913	0.465888	0.874608	1104.69	1089.48	USB1
ENST00000219299	-0.728798	0.208029	0.747515	1913.5	1554	CCDC113
ENST00000219301	-0.172763	0.634691	0.924682	443	394	PRSS54
ENST00000219302	0.00917501	0.86849	0.973931	803.927	798.968	NME3
ENST00000219313	-0.0338721	0.317184	0.816018	1246.36	1224.04	PSMD7
ENST00000219315	-0.65234	0.350771	0.833124	1288.92	1262.12	SETD6
ENST00000219320	0.160562	0.701725	0.939121	1842.3	2133.71	SLC38A7
ENST00000219322	NA	NA	NA	NA	NA	HAS3
ENST00000219334	NA	NA	NA	4	1143.75	SMPD3
ENST00000219343	-0.191802	0.561319	0.903113	2051.73	1732.06	SLC7A6
ENST00000219345	-0.0245138	0.917088	0.983968	1792.29	1836.02	PLA2G15
ENST00000219368	-1.13537	0.238766	0.770674	1486	640.667	FA2H
ENST00000219400	-0.0819623	0.104647	0.644093	752.627	711.434	CMC2
ENST00000219406	NA	NA	NA	1	1597	PDIA2
ENST00000219409	NA	NA	NA	2	937.5	ARHGDIG
ENST00000219431	-0.0520669	0.279215	0.800302	1058.44	1027.75	MPG
ENST00000219439	-0.475345	0.0746497	0.588811	1935.88	1547.14	HSDL1
ENST00000219454	-0.111241	0.128994	0.678928	1260.33	1190.21	WFDC1
ENST00000219473	-0.210317	0.274758	0.79783	2152.98	2000.12	USP10
ENST00000219476	-0.375652	0.400002	0.851802	2356.61	2236.43	TSC2
ENST00000219478	-0.622575	0.125683	0.674191	1809.08	1388.62	ZNF500
ENST00000219479	-0.230125	0.00137082	0.129883	928.269	832.152	NME4
ENST00000219481	-0.0848	0.51009	0.889651	1266.05	1195.45	DECR2
ENST00000219535	0.168202	0.650694	0.928306	675.333	777.25	FAM173A
ENST00000219548	-0.0716764	0.384968	0.846238	1129.99	1105.62	STUB1
ENST00000219551	0.701834	0.299534	0.808754	792.25	1328.6	RHBDL1
ENST00000219596	NA	NA	NA	1	1142	MEFV
ENST00000219599	NA	NA	NA	NA	NA	CRYM
ENST00000219611	-0.141697	0.50744	0.889399	1819.42	1697.09	CAPN15
ENST00000219660	NA	NA	NA	NA	NA	AQP8
ENST00000219689	-0.262736	0.18831	0.73265	1941.96	1748.22	USP31
ENST00000219700	0.338311	0.250083	0.779685	714.667	878.167	HMOX2
ENST00000219746	NA	NA	NA	NA	NA	TOX3
ENST00000219782	-0.131566	0.284577	0.802693	1399.67	1333.89	MAZ
ENST00000219789	-0.0670093	0.560364	0.902629	1378.43	1351.64	CDIPT
ENST00000219794	-0.129524	0.558123	0.902629	1542.03	1430.83	BCKDK
ENST00000219797	-0.0675629	0.796289	0.95839	1410	1462.64	KAT8
ENST00000219821	NA	NA	NA	1	2205	TMC5
ENST00000219833	NA	NA	NA	NA	NA	SLC6A2
ENST00000219837	-0.22309	0.179636	0.724378	1309.64	1155.76	KNOP1
ENST00000219905	-0.691795	0.190485	0.734567	2728.92	2240.67	MGA
ENST00000219919	NA	NA	NA	NA	NA	AQP9
ENST00000220003	0.00716592	0.965276	0.993669	1641.23	1697.16	CSK
ENST00000220058	-0.345085	0.0165705	0.376076	1272.3	1031.79	MTFMT
ENST00000220062	NA	NA	NA	NA	NA	RASL12
ENST00000220166	-0.2023	0.430489	0.862151	1176	1067.94	CTSH
ENST00000220244	0.671666	0.548278	0.901535	2748	4137.5	CEMIP
ENST00000220325	-0.313263	0.0528828	0.535209	2058.73	1731.95	EHD4
ENST00000220420	NA	NA	NA	NA	NA	TGM5
ENST00000220429	-0.210413	0.46369	0.874243	2120.25	1927.4	GABPB1
ENST00000220478	NA	NA	NA	1	909	SCG3
ENST00000220496	-0.0639076	0.560864	0.902925	849.638	785.19	DNAJC17
ENST00000220507	0.128039	0.798543	0.95945	1036.33	1124.57	RHOV
ENST00000220509	-0.288901	0.513122	0.890235	1793.15	1682.07	VPS18
ENST00000220514	-0.0941103	0.0714486	0.582062	1079.74	1034.2	OIP5
ENST00000220531	-0.0423569	0.824404	0.965274	1950.45	1891.55	BLOC1S6
ENST00000220562	-0.535487	0.0287074	0.445869	2350.75	1818.05	EXTL3
ENST00000220584	-0.238257	0.0897058	0.620978	1536.7	1359.62	FDFT1
ENST00000220592	0.0905657	0.572362	0.907672	1880.05	2059.92	AGO2
ENST00000220597	NA	NA	NA	745	1828.5	PAG1
ENST00000220616	NA	NA	NA	NA	NA	TG
ENST00000220659	-0.153321	0.293748	0.806453	1612.22	1548.68	BRF2
ENST00000220669	-0.118279	0.383491	0.846238	1649.29	1579.92	ZFAND1
ENST00000220676	NA	NA	NA	NA	NA	RP1
ENST00000220751	-0.274268	0.0534484	0.535877	1614.64	1400.29	RIPK2
ENST00000220763	-0.321474	0.224211	0.761036	1793.11	1535.11	CPQ
ENST00000220764	-0.0911402	0.126788	0.674924	1121.41	1035.77	DECR1
ENST00000220772	NA	NA	NA	2712	2288	SFRP1
ENST00000220809	-0.0925958	0.880909	0.976308	1288	1435.8	PLAT
ENST00000220812	NA	NA	NA	NA	NA	DKK4
ENST00000220822	-0.0496833	0.805257	0.960859	2061.62	1977.59	GDAP1
ENST00000220847	-0.191793	0.711575	0.94072	1631.5	1612.2	PHF20L1
ENST00000220849	-0.154857	0.0296355	0.451547	1271.9	1164.25	EIF3E
ENST00000220853	-0.0922028	0.387382	0.84713	1122.8	1097.83	EMC2
ENST00000220856	NA	NA	NA	NA	NA	WISP1
ENST00000220876	NA	NA	NA	NA	NA	STMN2
ENST00000220888	1.08075	0.763236	0.951621	2298	2909	TRPS1
ENST00000220913	-0.199289	0.327962	0.821483	1417.29	1299.44	CHRAC1
ENST00000220931	NA	NA	NA	1	1232	NCALD
ENST00000220940	NA	NA	NA	NA	NA	GML
ENST00000220959	-0.424153	0.168261	0.713827	2125.12	1461	UBR5
ENST00000220966	-0.131119	0.40831	0.854402	1550.39	1482.1	PYCR3
ENST00000221086	-0.154653	0.543471	0.900002	1744.11	1555.36	MTMR9
ENST00000221114	-0.0644565	0.339387	0.826436	962.941	916.32	DCTN6
ENST00000221130	-0.204953	0.0947691	0.625619	1375.02	1234.7	GSR
ENST00000221132	-0.254885	0.325008	0.82059	1610.28	1402.29	TNFRSF10A
ENST00000221138	-0.149808	0.0051814	0.240553	1475.73	1381.51	PPP2CB
ENST00000221166	NA	NA	NA	1	2578	NEFM
ENST00000221200	-0.14756	0.291324	0.80552	1675.71	1569.53	KCTD9
ENST00000221222	0.410994	0.103073	0.642044	379.167	492.667	HOMER3
ENST00000221232	-0.0836305	0.718301	0.942241	1947.14	1773.6	CNOT3
ENST00000221233	-0.0346492	0.478065	0.878679	949.339	940.037	EXOSC5
ENST00000221249	-0.0706089	0.747757	0.948805	1842.1	1772.01	PNPLA6
ENST00000221264	0.283939	0.443191	0.866486	700.182	865.231	PLAUR
ENST00000221265	-0.235855	0.0319222	0.460701	890.7	750.387	PAF1
ENST00000221283	0.0457881	0.838268	0.96781	1433.55	1491.11	STXBP2
ENST00000221307	NA	NA	NA	1	2883	CYP4F3
ENST00000221315	NA	NA	NA	4	1526.75	ZNF432
ENST00000221327	0.102102	0.778191	0.955269	2072.48	2035.49	ZNF180
ENST00000221355	NA	NA	NA	NA	NA	ZNF780B
ENST00000221363	0.152726	0.823888	0.965221	1220.08	1449.75	MAN2B1
ENST00000221399	NA	NA	NA	NA	NA	TULP2
ENST00000221403	NA	NA	NA	898	1152	DHDH
ENST00000221418	-0.117229	0.0751541	0.590452	1124.93	1054.29	ECH1
ENST00000221419	-0.227825	0.0320298	0.461284	1323.5	1140.39	HNRNPL
ENST00000221421	NA	NA	NA	NA	NA	LHB
ENST00000221431	0.0357613	0.866044	0.973622	1360.61	1435.31	SARS2
ENST00000221444	NA	NA	NA	1	2115	KCNA7
ENST00000221448	-0.0763557	0.686652	0.936245	871.954	859.543	SNRNP70
ENST00000221452	-0.726443	0.137345	0.688512	1508.27	1012.5	RELB
ENST00000221455	0.106547	0.516738	0.890791	1259.28	1358.2	CLASRP
ENST00000221459	-0.21238	0.352725	0.833642	1034.5	872.429	LIN7B
ENST00000221462	0.382052	0.230892	0.765765	1440.73	1573.86	PPP1R37
ENST00000221466	-0.206026	0.559265	0.902629	1465	1304	FCGRT
ENST00000221476	NA	NA	NA	NA	NA	CKM
ENST00000221480	-0.391357	0.54827	0.901535	1015.5	786	PEX11G
ENST00000221485	NA	NA	NA	NA	NA	SLC17A7
ENST00000221486	-0.0769739	0.274297	0.797768	1018.18	983.709	RNASEH2A
ENST00000221494	-0.15105	0.323208	0.819512	1176.31	1126.03	SF3A2
ENST00000221496	-0.350226	0.502612	0.887969	1618.3	1195.92	AMH
ENST00000221498	NA	NA	NA	NA	NA	DKKL1
ENST00000221504	0.0947327	0.62968	0.922377	692.821	664.708	TRMT1
ENST00000221515	NA	NA	NA	NA	NA	RETN
ENST00000221538	NA	NA	NA	NA	NA	RSPH6A
ENST00000221543	-0.156162	0.557421	0.902629	1710.81	1598.27	TBC1D17
ENST00000221554	0.198928	0.36764	0.840417	1193	1360.98	CCDC130
ENST00000221561	0.0244581	0.77279	0.953717	862.626	876.321	AES
ENST00000221566	-0.124769	0.328424	0.821581	1614.51	1595.61	SGTA
ENST00000221573	-0.144665	0.300109	0.809247	1327.36	1260.19	SNAPC2
ENST00000221665	-0.0535419	0.820609	0.964281	1656.15	1635.93	FIZ1
ENST00000221671	-0.220582	0.629961	0.922484	1619.29	1390.38	C19orf44
ENST00000221700	NA	NA	NA	NA	NA	CYP4F2
ENST00000221730	NA	NA	NA	NA	NA	EPHX3
ENST00000221735	0.226308	0.409463	0.854515	1658.29	1894.3	ZNF419
ENST00000221742	NA	NA	NA	NA	NA	SLC1A6
ENST00000221770	-0.217883	0.561946	0.903408	923.429	647.447	POP4
ENST00000221797	NA	NA	NA	NA	NA	LGALS13
ENST00000221801	-0.0366074	0.455505	0.871342	941.846	921.036	FBL
ENST00000221804	NA	NA	NA	NA	NA	CLC
ENST00000221847	NA	NA	NA	972	461	EBI3
ENST00000221855	-0.078064	0.296374	0.807306	1016.97	972.633	TBCB
ENST00000221856	-0.207956	0.0616744	0.560134	1425.35	1297.24	FSD1
ENST00000221859	-0.0653722	0.301295	0.810308	596.813	574.104	POLR2I
ENST00000221891	0.2406	0.203554	0.744063	1509.53	1815.9	APLP1
ENST00000221899	NA	NA	NA	2009.5	1294.5	CACTIN
ENST00000221922	-0.0778624	0.720659	0.942998	1283.24	1258.59	CCDC9
ENST00000221930	-0.119301	0.450336	0.86935	1429.53	1372.45	TGFB1
ENST00000221943	-0.0598457	0.240087	0.77195	1571.92	1531.55	DMAC2
ENST00000221954	NA	NA	NA	NA	NA	CEACAM4
ENST00000221957	-0.159674	0.205151	0.745397	1564.56	1449.89	PLIN3
ENST00000221972	NA	NA	NA	NA	NA	CD79A
ENST00000221973	NA	NA	NA	NA	NA	LIM2
ENST00000221975	-0.066094	0.0318061	0.460701	445.238	419.33	RPS19
ENST00000221978	NA	NA	NA	NA	NA	NKG7
ENST00000221980	-0.735226	0.300453	0.809563	1644	1101.5	ICAM5
ENST00000221992	NA	NA	NA	NA	NA	CEACAM5
ENST00000221996	NA	NA	NA	NA	NA	CRX
ENST00000222002	NA	NA	NA	NA	NA	SULT2A1
ENST00000222005	-0.08375	0.724432	0.94421	1068.87	1081.06	CDC37
ENST00000222008	-0.0491628	0.270429	0.794055	792.964	768.861	RABAC1
ENST00000222032	-0.0314784	0.66196	0.929204	421	407.16	CNFN
ENST00000222033	NA	NA	NA	NA	NA	ZNRF4
ENST00000222115	NA	NA	NA	NA	NA	HAS1
ENST00000222120	-0.254665	0.338485	0.826341	2130.24	1790.57	RAB3D
ENST00000222122	-0.205862	0.132804	0.683221	1178.02	1057.59	DBP
ENST00000222139	-0.413024	0.354132	0.833946	1376.25	1109.31	EPOR
ENST00000222145	-0.188477	0.125235	0.673555	1334.69	1227.78	RASIP1
ENST00000222157	NA	NA	NA	NA	NA	FGF21
ENST00000222190	-0.193285	0.123008	0.671591	533.4	472.765	WDR83OS
ENST00000222212	NA	NA	NA	NA	NA	CACNG7
ENST00000222214	-0.108987	0.459965	0.874177	1478.85	1424.88	GCDH
ENST00000222219	-0.0920603	0.400505	0.852081	1361.7	1317.97	DNASE2
ENST00000222224	-0.0876957	0.487499	0.88213	824.725	791.32	LENG1
ENST00000222247	-0.0234807	0.0238514	0.42384	660.953	652.416	RPL18A
ENST00000222248	NA	NA	NA	NA	NA	SLC5A5
ENST00000222249	NA	NA	NA	1	983	KCNN1
ENST00000222250	-0.506659	0.0534821	0.535877	1315.75	975.704	ARRDC2
ENST00000222254	-0.290335	0.0424249	0.4993	1934.04	1685.91	PIK3R2
ENST00000222256	0.242061	0.220966	0.758218	1100.5	1253.37	RAB3A
ENST00000222266	-0.0915481	0.538544	0.898477	486.357	452.519	PSENEN
ENST00000222271	NA	NA	NA	NA	NA	COMP
ENST00000222275	NA	NA	NA	NA	NA	UPK1A
ENST00000222284	-0.0555865	0.369094	0.841462	857.047	830.97	TMEM147
ENST00000222286	0.315089	0.720384	0.942901	1758.25	2107.5	GAPDHS
ENST00000222304	NA	NA	NA	NA	NA	HAMP
ENST00000222305	-0.0967119	0.64503	0.926854	1463.3	1388.62	USF2
ENST00000222307	-0.0654972	0.767393	0.952155	1169.98	1148.14	KXD1
ENST00000222308	-0.0514625	0.80363	0.960285	1072.31	1095.11	FKBP8
ENST00000222329	-0.0203395	0.91781	0.984048	1197.11	1237.53	ERF
ENST00000222330	-0.10957	0.760762	0.950999	1521.91	1475.9	GSK3A
ENST00000222339	0.251513	0.830738	0.96569	568.5	735	ZNF574
ENST00000222345	-1.21935	3.14829e-05	0.0244823	1812.31	1027.94	SIPA1L3
ENST00000222374	0.485983	0.234954	0.767154	747	1206	CADM4
ENST00000222381	NA	NA	NA	1	600	PON1
ENST00000222382	NA	NA	NA	NA	NA	CYP3A43
ENST00000222388	-0.850415	0.658249	0.929079	1299.5	1060.67	ABCF2
ENST00000222390	NA	NA	NA	NA	NA	HGF
ENST00000222399	-0.445182	0.554395	0.902581	3929.77	3135.32	LAMB1
ENST00000222402	-0.180526	0.33377	0.823894	1253.65	1128.31	UBE2D4
ENST00000222462	NA	NA	NA	NA	NA	WNT16
ENST00000222481	NA	NA	NA	895	819	CPA2
ENST00000222482	-0.167986	0.632163	0.923375	2784.73	2065.08	CPA4
ENST00000222511	-0.270502	0.0187583	0.38918	1275.32	1126.5	GTPBP10
ENST00000222543	-0.179289	0.0122714	0.338073	1158.6	1032.21	TFPI2
ENST00000222547	-0.0558601	0.625187	0.921888	1127.66	1068.64	BET1
ENST00000222553	-0.306613	0.00860266	0.295367	1764.56	1512.55	NAMPT
ENST00000222567	0.176649	0.460775	0.874177	1733.85	2072.88	TWISTNB
ENST00000222572	-0.17641	0.554142	0.902581	1217.77	1099.8	PON2
ENST00000222573	-0.38921	0.211699	0.750664	1800.54	1518.8	ITGB8
ENST00000222574	-0.30438	0.00347203	0.200522	1922.31	1653.71	HBP1
ENST00000222584	-0.0583551	0.925877	0.98564	1753.52	1813.18	SP4
ENST00000222597	-0.021038	0.951051	0.991623	1056.45	1120.33	CBLL1
ENST00000222598	-0.426325	0.474088	0.876757	1408.67	1184.5	DLX5
ENST00000222644	-0.498245	0.0028175	0.183872	1843.2	1369.34	MPP6
ENST00000222673	-0.387064	0.218099	0.756129	2108.39	1796.66	OGDH
ENST00000222674	NA	NA	NA	NA	NA	NPVF
ENST00000222690	-0.122374	0.420952	0.858699	1867.05	1824.24	H2AFV
ENST00000222693	-0.233778	0.000131268	0.043723	1415.06	1259.59	CAV2
ENST00000222718	NA	NA	NA	1525	1329	HOXA2
ENST00000222725	0.132706	0.707223	0.939896	1575	1680.77	LFNG
ENST00000222726	NA	NA	NA	2	361.5	HOXA5
ENST00000222728	NA	NA	NA	1	2594	HOXA6
ENST00000222747	-0.352947	0.003918	0.215415	1538.8	1236.24	TSPAN12
ENST00000222753	-0.144043	0.511493	0.890223	1878.71	1713.03	HOXA13
ENST00000222761	NA	NA	NA	NA	NA	EVX1
ENST00000222792	-1.60529	0.294118	0.806453	2711.5	1118	CHN2
ENST00000222800	-0.0547229	0.59758	0.91421	1222.72	1194.3	ABHD11
ENST00000222803	-0.540453	0.000589757	0.0923148	1954.59	1371.76	FKBP14
ENST00000222812	-0.477408	0.103766	0.642307	2108.75	1529.12	STX1A
ENST00000222823	-0.146711	0.551237	0.901722	2091.85	1944.37	NOD1
ENST00000222902	NA	NA	NA	NA	NA	CCL24
ENST00000222969	-0.16228	0.000172859	0.0500156	1022.1	938.07	BUD31
ENST00000222982	NA	NA	NA	NA	NA	CYP3A5
ENST00000222990	0.183632	0.0675147	0.572357	1040.4	1152.8	SNX8
ENST00000223023	-0.151	0.322489	0.818846	1738.65	1626.62	WASL
ENST00000223026	NA	NA	NA	NA	NA	HYAL4
ENST00000223028	NA	NA	NA	NA	NA	SPAM1
ENST00000223029	-0.0697815	0.112841	0.655249	1112.65	1077.23	AIMP2
ENST00000223051	-0.226401	0.600159	0.915227	1597.28	1442.06	TFR2
ENST00000223054	-0.248439	0.37078	0.842133	1075.29	1006.27	MOSPD3
ENST00000223061	-0.16449	0.123253	0.671591	1229.23	1142.39	PCOLCE
ENST00000223073	-0.247789	0.0450378	0.510214	1766.23	1605.61	RBM28
ENST00000223095	-0.161272	0.0792948	0.597894	1729.75	1556.73	SERPINE1
ENST00000223114	NA	NA	NA	NA	NA	MOGAT3
ENST00000223122	-0.764554	0.019455	0.394697	1575.42	1018.04	C1GALT1
ENST00000223127	-0.305189	0.0683725	0.576216	1766.13	1548.47	PLOD3
ENST00000223129	-0.0428637	0.16071	0.707014	622.905	604.762	RPA3
ENST00000223136	-0.0492664	0.00669422	0.266338	777.38	757.042	FIS1
ENST00000223145	-0.315374	0.440865	0.865915	1998.32	1743.6	GLCCI1
ENST00000223167	NA	NA	NA	NA	NA	MYL10
ENST00000223190	-0.636577	0.647839	0.927466	1735	1411.5	NRF1
ENST00000223208	0.0350768	0.873008	0.97505	1911.18	1848.61	CEP41
ENST00000223210	-0.476445	0.323104	0.819512	2573.4	1737.75	ZNF862
ENST00000223215	-0.322544	0.0111443	0.325997	1448.2	1198.54	MEST
ENST00000223271	-0.154311	0.0412511	0.493996	655.814	604.177	RARRES2
ENST00000223273	-0.031746	0.673327	0.931893	870.597	846.389	YAE1D1
ENST00000223293	NA	NA	NA	NA	NA	GIMAP2
ENST00000223321	-0.0872367	0.0155807	0.364593	921.195	879.968	PSMA2
ENST00000223324	-0.0284403	0.578184	0.909427	849.561	847.275	MRPL32
ENST00000223336	-0.0648381	0.350139	0.833036	928.331	892.218	COA1
ENST00000223357	NA	NA	NA	NA	NA	AEBP1
ENST00000223361	0.0764774	0.914536	0.983736	496	606.714	POLD2
ENST00000223364	NA	NA	NA	NA	NA	MYL7
ENST00000223368	-0.114342	0.329831	0.822133	1328.53	1302.18	BCL7B
ENST00000223369	-0.161474	0.161627	0.708476	1541.64	1377.54	YKT6
ENST00000223398	-0.117836	0.693489	0.937487	2172.14	2234.64	CLIP2
ENST00000223423	NA	NA	NA	NA	NA	PTGS1
ENST00000223428	0.411152	0.37734	0.84471	1278.25	1765.69	ZNF510
ENST00000223459	-0.185572	0.289602	0.805392	1108.91	1003.96	ZNF688
ENST00000223500	-0.0436254	0.568847	0.906315	1161.88	1129.27	CHMP5
ENST00000223528	-0.268935	0.305389	0.811494	1907.03	1917.64	FKTN
ENST00000223609	-0.0313847	0.930799	0.986247	1049.5	953	PRUNE2
ENST00000223641	-0.00666096	0.522274	0.89269	612.677	612.004	SEC61B
ENST00000223642	-0.55765	0.490869	0.883046	1638.33	1486.91	C5
ENST00000223791	NA	NA	NA	NA	NA	AKNA
ENST00000223795	NA	NA	NA	NA	NA	TNFSF8
ENST00000223836	NA	NA	NA	NA	NA	AK1
ENST00000223862	NA	NA	NA	1	839	RLN1
ENST00000223864	-0.0517017	0.332029	0.822393	908.495	885.377	PLGRKT
ENST00000223865	0.0611325	0.920015	0.984254	1200.67	1327.75	TBC1D13
ENST00000223951	NA	NA	NA	NA	NA	ELAVL2
ENST00000224073	-0.0449628	0.0509503	0.528982	700.842	684.996	EDF1
ENST00000224140	-0.273587	0.284104	0.802647	2015.96	1906.82	SETX
ENST00000224181	NA	NA	NA	1	1255	C8G
ENST00000224237	-0.154543	0.12387	0.671906	1495.4	1404.33	VIM
ENST00000224337	NA	NA	NA	NA	NA	BLNK
ENST00000224356	NA	NA	NA	1	2087	CYP26A1
ENST00000224652	-0.704737	0.454297	0.870748	1952.22	1427	ATE1
ENST00000224721	NA	NA	NA	NA	NA	CDH23
ENST00000224756	-0.125757	0.719183	0.942367	2028.93	2237.95	CCSER2
ENST00000224784	-0.123993	0.18392	0.727901	1215.55	1124.14	ACTA2
ENST00000224807	0.0854586	0.815581	0.963576	1299.75	1372.46	SFXN3
ENST00000224862	0.0293358	0.848865	0.969914	1063.23	1092.08	FBXL15
ENST00000224949	-0.24046	0.150669	0.701408	2531.64	2306.46	PITRM1
ENST00000224950	-0.425912	0.156619	0.704496	1462.93	1075.05	STN1
ENST00000225171	-0.117476	0.0937845	0.625194	1008.85	953.116	DNAJC12
ENST00000225174	-0.199692	0.0112244	0.326751	1447.13	1299.48	PPIF
ENST00000225235	-0.595077	0.101315	0.638402	2304.11	1527.75	TBC1D12
ENST00000225275	NA	NA	NA	NA	NA	MPO
ENST00000225276	0.849511	0.469492	0.874608	687	1414.5	ST6GALNAC2
ENST00000225296	-0.16819	0.586757	0.911092	1744	1634.05	DHX33
ENST00000225298	-0.0747949	0.573256	0.908073	1434.54	1377.87	UTP18
ENST00000225308	-0.108447	0.156162	0.704006	1284.66	1215.26	SLC25A39
ENST00000225328	-0.107293	0.470976	0.875136	1789.76	1732.43	P2RX5
ENST00000225371	NA	NA	NA	NA	NA	EPX
ENST00000225387	NA	NA	NA	NA	NA	CRYBA1
ENST00000225388	-0.130075	0.384361	0.846238	1838.45	1727.84	NUFIP2
ENST00000225394	-0.295567	0.358852	0.835072	1893.98	1712.55	GIT1
ENST00000225430	-0.0249884	0.185856	0.730141	740.29	730.215	RPL19
ENST00000225441	NA	NA	NA	NA	NA	RUNDC3A
ENST00000225474	NA	NA	NA	NA	NA	CSF3
ENST00000225504	-0.151681	0.000252198	0.0576152	961.514	885.762	SUPT4H1
ENST00000225512	0.0260579	0.963156	0.993534	1659.53	1791.33	WNT3
ENST00000225519	-0.280389	0.230132	0.765416	1857.36	1655.97	SHPK
ENST00000225525	-0.0303732	0.622214	0.920863	1248.62	1239.91	TAX1BP3
ENST00000225538	-0.658796	0.303711	0.811265	2644	1842.33	P2RX1
ENST00000225550	NA	NA	NA	NA	NA	KRT37
ENST00000225567	-0.251464	0.115644	0.658755	1098.4	894.846	GOSR2
ENST00000225573	1.29611	0.112434	0.654606	369.333	954.667	PNPO
ENST00000225576	NA	NA	NA	9	938.889	TVP23C
ENST00000225577	-0.0921389	0.627028	0.921929	1426.52	1323.31	RPS6KB1
ENST00000225603	-0.283165	0.0863334	0.613044	1685.1	1462.17	CBX1
ENST00000225609	0.134723	0.604768	0.916394	983.474	993.5	PIGL
ENST00000225614	0.135537	0.431355	0.862723	1132.9	1243.76	GALK1
ENST00000225648	-0.622914	0.53221	0.896458	917	617.5	HOXB6
ENST00000225655	-0.0463149	0.184935	0.729422	821.671	804.628	PFN1
ENST00000225665	-0.140677	0.0757656	0.591743	1230.73	1150.89	SLC25A11
ENST00000225688	-0.33026	0.146439	0.698334	1549.64	1292.33	RASD1
ENST00000225698	-0.0808512	0.0229171	0.418034	1067.31	1024.58	C1QBP
ENST00000225719	-0.664776	0.00531506	0.244103	2600.73	1781.95	CPD
ENST00000225724	-0.202696	0.355543	0.834716	1388.96	1230.81	GOSR1
ENST00000225726	-0.390644	0.00450523	0.228411	1825.05	1472.98	CCDC47
ENST00000225728	-0.114971	0.00395704	0.216316	701.252	649.24	MED31
ENST00000225729	-0.154041	0.301956	0.810722	1392.26	1336.74	DRG2
ENST00000225737	-0.0528417	0.762657	0.951621	1793.43	1722.35	AKAP10
ENST00000225740	-0.0645059	0.652401	0.928812	1478.72	1434.16	ALDH3A1
ENST00000225742	NA	NA	NA	1	272	SMARCD2
ENST00000225777	-0.131593	0.00789299	0.284754	1389.65	1307.71	SYNGR2
ENST00000225792	-0.2605	0.00747853	0.280029	1739.11	1531.57	DDX5
ENST00000225805	-0.16491	0.309398	0.812915	1148.5	1028.78	C17orf75
ENST00000225823	NA	NA	NA	NA	NA	ASIC2
ENST00000225831	-0.0396925	0.655371	0.92906	742.895	716.29	CCL2
ENST00000225842	NA	NA	NA	NA	NA	CCL1
ENST00000225844	NA	NA	NA	2	871	CCL13
ENST00000225873	0.0960997	0.780367	0.955466	1611.41	1752.22	PEX12
ENST00000225899	NA	NA	NA	NA	NA	KRT32
ENST00000225916	-0.261119	0.0387779	0.484005	1813.49	1565.83	KAT2A
ENST00000225927	0.168525	0.443028	0.866486	1266.63	1434.17	NAGLU
ENST00000225929	0.0586351	0.711985	0.94072	798	835.667	HSD17B1
ENST00000225941	NA	NA	NA	NA	NA	ABI3
ENST00000225964	-0.0956602	0.775061	0.954355	2046.27	2011.04	COL1A1
ENST00000225969	-0.0151407	0.675306	0.932427	730.469	721.611	MRPL27
ENST00000225972	-0.141747	0.0741174	0.588277	1429.2	1318.39	LRRC59
ENST00000225983	-0.356996	0.510837	0.889971	2003.76	1900.31	HDAC5
ENST00000225992	NA	NA	NA	NA	NA	PPY
ENST00000226004	-0.205351	0.203699	0.744063	1816.26	1687.18	DUSP3
ENST00000226021	NA	NA	NA	NA	NA	CACNG1
ENST00000226067	NA	NA	NA	1	2554	HLF
ENST00000226091	NA	NA	NA	NA	NA	EFNB3
ENST00000226105	-0.430968	0.07365	0.587246	799.333	626.556	RANGRF
ENST00000226193	NA	NA	NA	NA	NA	RCVRN
ENST00000226207	NA	NA	NA	NA	NA	MYH1
ENST00000226218	0.394815	0.616535	0.920175	1334.2	1627	VTN
ENST00000226225	-0.309915	0.0377893	0.483094	1752.23	1453.41	TNFAIP1
ENST00000226230	-0.165934	0.21509	0.754868	1548.01	1409.92	TMEM97
ENST00000226247	0.102635	0.831549	0.96569	1429.67	1455	FOXN1
ENST00000226253	-0.584198	0.159809	0.706116	1438.5	1049.73	ALDOC
ENST00000226279	NA	NA	NA	2	1106	CD38
ENST00000226284	NA	NA	NA	NA	NA	IBSP
ENST00000226299	-0.0863362	0.477871	0.878679	1511.19	1468.23	LAP3
ENST00000226317	NA	NA	NA	NA	NA	CXCL6
ENST00000226319	-0.188846	0.571695	0.907556	2489.52	2182.84	JADE1
ENST00000226328	-0.644222	0.621877	0.920793	2066.6	2942.8	RUFY3
ENST00000226355	NA	NA	NA	NA	NA	AFM
ENST00000226359	NA	NA	NA	NA	NA	AFP
ENST00000226382	NA	NA	NA	NA	NA	PHOX2B
ENST00000226413	NA	NA	NA	NA	NA	GNRHR
ENST00000226432	NA	NA	NA	NA	NA	CWH43
ENST00000226444	-0.390503	0.329866	0.822133	1090.6	907.875	SULT1E1
ENST00000226460	NA	NA	NA	NA	NA	SMR3A
ENST00000226522	-0.256901	0.365512	0.838633	681.25	633.208	LAMTOR3
ENST00000226524	NA	NA	NA	NA	NA	PF4V1
ENST00000226574	-0.352344	0.129266	0.679352	2367.86	1971.97	NFKB1
ENST00000226578	-0.107012	0.588328	0.911548	1919.14	1839	MANBA
ENST00000226725	-0.0310808	0.926725	0.985951	2165.76	2132.87	KLHL2
ENST00000226730	NA	NA	NA	NA	NA	IL2
ENST00000226760	-0.547164	0.142964	0.694941	2401.3	2035.1	WFS1
ENST00000226796	0.00292623	0.974474	0.994347	678.904	683.831	GAR1
ENST00000226798	-0.122466	0.0555232	0.544119	1072.74	958.856	FRG1
ENST00000226951	NA	NA	NA	NA	NA	CLNK
ENST00000227065	NA	NA	NA	NA	NA	FAM149A
ENST00000227135	-0.25357	0.361962	0.836143	751.75	652.5	SPA17
ENST00000227155	-0.11843	0.676197	0.93276	1382.79	1392.39	CD82
ENST00000227157	-0.108255	0.0026209	0.178054	614.874	575.957	LDHA
ENST00000227163	NA	NA	NA	NA	NA	SPI1
ENST00000227214	NA	NA	NA	1	1952	PLEKHB1
ENST00000227251	-0.227503	0.505781	0.889302	728.5	680.25	CRYAB
ENST00000227266	-0.189711	0.099282	0.633189	1484.92	1353.3	CTSC
ENST00000227322	-0.131137	0.315577	0.815127	1404.33	1314.72	ZPR1
ENST00000227348	NA	NA	NA	NA	NA	CRTAM
ENST00000227349	NA	NA	NA	1	1092	JHY
ENST00000227378	-0.0844558	0.529682	0.895412	1204.65	1157.56	HSPA8
ENST00000227451	0.197593	0.814252	0.963033	1770.9	2180.2	DTX4
ENST00000227471	-0.17523	0.266201	0.793381	1569.84	1417.01	UNC93B1
ENST00000227474	-0.0594855	0.686953	0.936245	1616.83	1576.93	PUS3
ENST00000227495	-0.262204	0.772294	0.953717	1556.83	1300	ST3GAL4
ENST00000227503	-0.102119	0.586115	0.910875	1453.34	1364.34	SF1
ENST00000227507	-0.246876	0.238765	0.770674	1672.88	1545.02	CCND1
ENST00000227520	-0.0673517	0.715292	0.941745	1315.58	1280.71	CCDC86
ENST00000227524	-0.109038	0.56787	0.906315	1411.17	1402.19	PRPF19
ENST00000227525	-0.101308	0.437817	0.865387	1517.72	1447.67	TMEM109
ENST00000227618	-0.0274454	0.793002	0.957996	778.338	783.077	ANAPC15
ENST00000227638	-0.232419	0.486714	0.88201	2621.33	2054.78	PANX1
ENST00000227665	NA	NA	NA	NA	NA	APOA5
ENST00000227667	NA	NA	NA	NA	NA	APOC3
ENST00000227752	NA	NA	NA	NA	NA	IL10RA
ENST00000227756	0.0719171	0.911323	0.983397	1603.67	1678.33	GALNT18
ENST00000227758	-0.0520797	0.839364	0.967877	2075.68	2031.81	BIRC2
ENST00000227868	-0.224425	0.102292	0.640935	2071.37	1846.06	PDHX
ENST00000227880	NA	NA	NA	NA	NA	SLC15A3
ENST00000227918	NA	NA	NA	NA	NA	SCGB2A2
ENST00000228027	-0.290041	0.343809	0.828974	1808.67	1671.75	DGAT2
ENST00000228136	-0.0667908	0.427002	0.8601	1157.72	1126.75	C11orf58
ENST00000228140	0.0480861	0.870897	0.974448	308.786	344	RPS13
ENST00000228226	NA	NA	NA	NA	NA	HP
ENST00000228251	-0.0650844	0.481098	0.880944	1743.5	1712.11	YBX3
ENST00000228264	0.214954	0.225875	0.763264	1893.98	2051.25	DDX11
ENST00000228280	-0.187796	0.770009	0.952761	4050	3374.6	KITLG
ENST00000228284	-0.115468	0.370134	0.84198	1869.52	1762.52	SART3
ENST00000228289	NA	NA	NA	NA	NA	ZNF268
ENST00000228306	-0.104829	0.0653675	0.568788	1123.49	1061.24	RPLP0
ENST00000228307	-0.211227	0.394414	0.849643	2093.75	1985.37	PXN
ENST00000228318	-0.0624204	0.422578	0.859313	697.389	683.833	SLC25A3
ENST00000228347	-0.639208	0.0373399	0.481458	2362.81	1618.56	POLR3B
ENST00000228425	-0.215855	0.729164	0.944847	2291.17	2089.5	PPFIBP1
ENST00000228434	NA	NA	NA	NA	NA	CD69
ENST00000228437	-0.436918	0.0451658	0.510214	2331.23	1934.26	PRDM4
ENST00000228438	NA	NA	NA	1	995	CLEC2B
ENST00000228463	NA	NA	NA	NA	NA	SELPLG
ENST00000228468	0.0873457	0.741444	0.947442	1955.44	2037.75	ASIC1
ENST00000228476	NA	NA	NA	NA	NA	DAO
ENST00000228495	-0.117369	0.638999	0.925836	1847.32	1742.91	KCTD10
ENST00000228506	-0.400675	0.0176965	0.387254	1792.3	1432.79	MLEC
ENST00000228510	-0.31503	0.336857	0.825288	1693.17	1501.1	MVK
ENST00000228515	0.0862596	0.796211	0.958385	1690.78	1890.42	CSRNP2
ENST00000228534	NA	NA	NA	915	876	IL23A
ENST00000228567	NA	NA	NA	NA	NA	SYT10
ENST00000228606	0.128737	0.805754	0.961021	1460	1502.89	CYP27B1
ENST00000228641	NA	NA	NA	NA	NA	MYF6
ENST00000228644	NA	NA	NA	NA	NA	MYF5
ENST00000228682	-0.235739	0.465186	0.874608	974.5	855.4	GLI1
ENST00000228705	-0.82868	0.0691036	0.577738	3014.36	1766.56	PPM1H
ENST00000228740	-0.235098	0.0533402	0.535877	1814.23	1605.03	LTA4H
ENST00000228741	0.052681	0.77955	0.955466	1962.02	1967.95	ELK3
ENST00000228799	-0.50394	0.0369893	0.480417	1667.94	1332.67	ITFG2
ENST00000228811	-1.92889	0.0222487	0.416306	1268	334.5	PRR4
ENST00000228820	NA	NA	NA	1	831	PARP11
ENST00000228825	-0.0584719	0.118675	0.663837	836.061	808.684	ARPC3
ENST00000228827	-0.0935155	0.311628	0.814086	1183.46	1132.3	GPN3
ENST00000228837	NA	NA	NA	NA	NA	FGF6
ENST00000228841	NA	NA	NA	NA	NA	MYL2
ENST00000228843	-0.131367	0.50716	0.889399	1724.65	1604.2	RAD51AP1
ENST00000228850	NA	NA	NA	NA	NA	AKAP3
ENST00000228862	-0.460732	0.758991	0.950605	1638.5	1068	DUSP16
ENST00000228865	-0.210002	0.0761549	0.592949	1864.81	1692.35	CREBL2
ENST00000228872	-0.112783	0.350554	0.833124	1592.91	1535.29	CDKN1B
ENST00000228887	NA	NA	NA	2473	1471.5	GPRC5D
ENST00000228916	0.166777	0.842318	0.968153	1759.57	1738	SCNN1A
ENST00000228918	-0.186919	0.234855	0.767154	1506.9	1399.5	LTBR
ENST00000228922	-0.236931	0.401436	0.852332	1282	1152.92	OGFOD2
ENST00000228928	0.216227	0.419322	0.857827	2013.31	2181.78	OAS3
ENST00000228936	NA	NA	NA	NA	NA	ART4
ENST00000228938	NA	NA	NA	667	520	MGP
ENST00000228945	0.0988229	0.694668	0.937487	1116	1143.8	ARHGDIB
ENST00000228955	-0.748649	0.247546	0.778337	1244	897.5	GTF2H3
ENST00000229002	NA	NA	NA	2	1010	RERGL
ENST00000229003	NA	NA	NA	1	402	ENDOU
ENST00000229022	-0.6279	0.471141	0.87533	2839.2	2037.2	VDR
ENST00000229030	0.286598	0.743074	0.947736	1113.14	1759	FZD10
ENST00000229134	NA	NA	NA	NA	NA	IL26
ENST00000229135	NA	NA	NA	NA	NA	IFNG
ENST00000229179	-0.075397	0.658118	0.929079	2139.45	2041.79	NUP107
ENST00000229195	-0.223046	0.160754	0.707014	1751.17	1517.46	CNOT2
ENST00000229201	-0.154431	0.534596	0.897678	1594.53	1448.55	TIMELESS
ENST00000229214	-0.0350627	0.714079	0.941278	1390.99	1340.42	KRR1
ENST00000229238	-0.0186611	0.0923377	0.623709	682.738	679.488	MRPL51
ENST00000229239	-0.0652266	0.0406287	0.490437	1232.82	1194.35	GAPDH
ENST00000229243	NA	NA	NA	NA	NA	ACRBP
ENST00000229251	-1.06587	0.0154039	0.362582	1466.25	707.25	COPS7A
ENST00000229264	-0.476738	0.631991	0.923375	977	908.5	GNB3
ENST00000229265	0.0757826	0.655948	0.92906	561.154	582.625	CDCA3
ENST00000229266	-0.123853	0.396087	0.850006	1270.85	1179.63	CHPT1
ENST00000229268	-0.00730236	0.981862	0.995951	1414.61	1543.84	USP5
ENST00000229270	-0.11712	0.0318553	0.460701	1149.77	1081.51	TPI1
ENST00000229277	-0.132445	0.536809	0.898139	2110.52	1975.88	ENO2
ENST00000229281	-0.0297193	0.0978684	0.630553	600.225	591.317	C12orf57
ENST00000229304	NA	NA	NA	NA	NA	APOBEC1
ENST00000229307	NA	NA	NA	4	2375.5	NANOG
ENST00000229314	-0.300129	0.066832	0.572245	1733.21	1419.09	GOLT1B
ENST00000229328	-0.00763558	0.967757	0.993741	1934.17	1991.58	PRKAB1
ENST00000229329	-0.178405	0.0249371	0.427775	1407.55	1287.22	CMAS
ENST00000229330	-0.0643269	0.808937	0.96174	1734.25	1788.05	HCFC2
ENST00000229332	NA	NA	NA	1	1135	CLEC4A
ENST00000229335	NA	NA	NA	NA	NA	AICDA
ENST00000229340	-0.196366	0.415427	0.857072	1410.34	1295.69	RAB35
ENST00000229379	-0.0352612	0.106617	0.64803	589.98	576.349	COX6A1
ENST00000229387	NA	NA	NA	NA	NA	RFX4
ENST00000229390	-0.0891481	0.268896	0.793907	1022.02	977.161	SRSF9
ENST00000229395	-0.457991	0.0909364	0.622658	1872.07	1525.36	FGFR1OP2
ENST00000229402	NA	NA	NA	NA	NA	KLRB1
ENST00000229416	-0.0983012	0.48672	0.88201	1986.36	1841.82	GCLC
ENST00000229447	NA	NA	NA	NA	NA	IYD
ENST00000229465	-0.218228	0.320978	0.817792	1108.58	982.589	FLJ22447
ENST00000229471	NA	NA	NA	1087	504.5	FYN
ENST00000229554	NA	NA	NA	NA	NA	RSPH4A
ENST00000229563	-0.0973646	0.00159055	0.140189	918.495	869.57	TMEM14C
ENST00000229570	0.0707338	0.746755	0.948732	1203.05	1229.96	SMIM8
ENST00000229583	NA	NA	NA	NA	NA	ADTRP
ENST00000229595	-0.137817	0.0764818	0.593558	1312.26	1223.79	ASF1A
ENST00000229633	0.0978187	0.551194	0.901722	825.958	928.386	HINT3
ENST00000229634	NA	NA	NA	NA	NA	NCOA7
ENST00000229708	-0.229614	0.655847	0.92906	1567.69	1463.71	ULBP1
ENST00000229729	NA	NA	NA	NA	NA	SLC44A4
ENST00000229758	-0.270808	0.110146	0.651858	1636.83	1472.24	FBXO5
ENST00000229768	NA	NA	NA	NA	NA	OPRM1
ENST00000229769	0.157848	0.481086	0.880944	1465.28	1716.59	FANCE
ENST00000229771	-1.04782	0.333509	0.823618	1734	943.8	TULP1
ENST00000229794	0.00209624	0.992072	0.997389	2396.48	2399.32	MAPK14
ENST00000229795	-0.042148	0.827844	0.965356	1765.13	1734.88	MAPK14
ENST00000229810	NA	NA	NA	NA	NA	RHAG
ENST00000229812	-0.0824249	0.549667	0.901535	2035.46	1914.53	STK38
ENST00000229829	NA	NA	NA	1	628	HLA-DOA
ENST00000229854	-0.256524	0.0589179	0.552079	1768.93	1533.07	MCM3
ENST00000229903	0.00725452	0.953445	0.992196	1081.96	1080.37	SAYSD1
ENST00000229913	NA	NA	NA	NA	NA	KIF6
ENST00000229922	-0.549049	0.00387394	0.213813	2528.9	1973	CAP2
ENST00000229955	NA	NA	NA	1131	255	GPR63
ENST00000229971	0.941272	0.00659727	0.264702	1069.6	1918.87	FBXL4
ENST00000230036	NA	NA	NA	1	2064	GPLD1
ENST00000230048	-0.0368933	0.735018	0.946072	685.032	688.049	ACOT13
ENST00000230050	-0.0445222	0.023916	0.42384	562.05	547.53	RPS12
ENST00000230053	-0.306943	0.57808	0.909427	653.667	488	B3GAT2
ENST00000230056	-0.0760022	0.417492	0.857244	1111.13	1077.2	GMNN
ENST00000230085	-0.028806	0.656923	0.92906	1177.23	1156.27	SNX3
ENST00000230113	NA	NA	NA	NA	NA	LINC01702
ENST00000230122	0.295195	0.463401	0.874177	1551.27	1847.89	ZBTB24
ENST00000230124	-0.684526	0.00126388	0.128349	1888.42	1336.05	FIG4
ENST00000230173	-1.27128	0.0676108	0.572357	2572.57	1518.36	ADGRG6
ENST00000230256	NA	NA	NA	NA	NA	UNC93A
ENST00000230301	NA	NA	NA	NA	NA	C6orf118
ENST00000230323	-0.060575	0.846292	0.968674	1300.93	1237	TFEB
ENST00000230340	-0.0828208	0.261851	0.789134	1434.25	1373.51	BYSL
ENST00000230354	0.349043	0.411021	0.855218	1202.53	1346.68	TBP
ENST00000230361	NA	NA	NA	NA	NA	GUCA1B
ENST00000230381	NA	NA	NA	NA	NA	PRPH2
ENST00000230413	-0.015003	0.954979	0.992479	658.667	698.062	MRPL2
ENST00000230419	0.0205924	0.923435	0.985026	2555.05	2569.06	PTK7
ENST00000230431	-0.00612793	0.871586	0.974762	680.767	685.622	DNPH1
ENST00000230449	0.02348	0.934612	0.987399	1876.43	1870.01	EXOC2
ENST00000230461	-0.282263	0.0207753	0.407608	2106.9	1732.92	TMEM30A
ENST00000230480	NA	NA	NA	1	1259	VEGFA
ENST00000230510	0.0848246	0.719338	0.942402	1804.6	1871.81	TTK
ENST00000230529	NA	NA	NA	NA	NA	WISP3
ENST00000230538	-0.747382	0.000756032	0.104545	2676.92	1699.19	LAMA4
ENST00000230565	NA	NA	NA	NA	NA	ENPP5
ENST00000230568	NA	NA	NA	NA	NA	LY86
ENST00000230582	-0.731497	0.594535	0.913675	1039	692	PRSS16
ENST00000230588	NA	NA	NA	NA	NA	MEP1A
ENST00000230640	-0.246243	0.114711	0.657493	1992.41	1768.58	SKIV2L2
ENST00000230658	0.0740711	0.731634	0.944884	1619.74	1719.23	ISL1
ENST00000230671	NA	NA	NA	2	1149.5	SLC6A7
ENST00000230732	NA	NA	NA	NA	NA	POU4F3
ENST00000230771	-0.126383	0.556764	0.902629	1742.19	1585.03	HARS2
ENST00000230792	-0.0638954	0.802658	0.960126	1980.1	2001.78	NUDT12
ENST00000230859	-0.485614	0.00289872	0.186546	2170.06	1771.68	PAPD7
ENST00000230882	NA	NA	NA	NA	NA	GHR
ENST00000230895	-0.156121	0.140413	0.690528	1725.08	1581.48	DAP
ENST00000230901	-0.21979	0.191933	0.734931	2054.76	1872.63	BRD8
ENST00000230990	0.124607	0.601687	0.915807	1359.49	1490.3	HBEGF
ENST00000231004	-0.266267	0.0958366	0.628353	1881.14	1712.05	LOX
ENST00000231009	NA	NA	NA	NA	NA	GZMK
ENST00000231021	NA	NA	NA	NA	NA	CDH9
ENST00000231061	NA	NA	NA	NA	NA	SPARC
ENST00000231121	NA	NA	NA	NA	NA	HAND1
ENST00000231130	NA	NA	NA	NA	NA	PCDHB3
ENST00000231134	NA	NA	NA	2	312	PCDHB5
ENST00000231136	NA	NA	NA	NA	NA	PCDHB6
ENST00000231137	NA	NA	NA	1	1533	PCDHB7
ENST00000231173	NA	NA	NA	2	2114	PCDHB15
ENST00000231188	NA	NA	NA	NA	NA	GRM6
ENST00000231198	-0.0765258	0.682471	0.935306	1191.33	1108.64	THG1L
ENST00000231228	NA	NA	NA	NA	NA	IL12B
ENST00000231229	NA	NA	NA	NA	NA	BTNL8
ENST00000231238	-0.0666932	0.35311	0.833864	1202.99	1174.93	TTC1
ENST00000231338	NA	NA	NA	2	645.5	C1QTNF3
ENST00000231357	NA	NA	NA	NA	NA	IRX4
ENST00000231368	-0.179414	0.429899	0.86188	2091.63	1668.71	LNPEP
ENST00000231420	NA	NA	NA	NA	NA	AGXT2
ENST00000231423	NA	NA	NA	NA	NA	PRLR
ENST00000231449	NA	NA	NA	NA	NA	IL4
ENST00000231454	NA	NA	NA	NA	NA	IL5
ENST00000231461	-0.0367793	0.938049	0.988188	1761.2	1721.64	ST8SIA4
ENST00000231484	NA	NA	NA	NA	NA	PCDH12
ENST00000231498	-0.144474	0.538184	0.898346	1866.39	1826.47	NUP155
ENST00000231509	NA	NA	NA	1	783	NR3C1
ENST00000231512	-0.264712	0.115992	0.659638	1634.63	1441.87	C5orf15
ENST00000231524	-0.557894	0.0441263	0.50575	1876.09	1362.22	TRIM23
ENST00000231526	-0.23964	0.572295	0.907672	1026.36	1031	TRAPPC13
ENST00000231572	-0.248362	0.0139565	0.3505	1594.53	1396.26	RARS
ENST00000231656	NA	NA	NA	NA	NA	CDX1
ENST00000231668	-0.235483	0.413329	0.856157	1231.33	1082.2	BNIP1
ENST00000231683	NA	NA	NA	NA	NA	HRH2
ENST00000231706	NA	NA	NA	1	843	SLC7A14
ENST00000231721	NA	NA	NA	1	2473	SEMA3G
ENST00000231749	NA	NA	NA	1680.5	1256	ZMYND10
ENST00000231751	NA	NA	NA	NA	NA	LTF
ENST00000231790	-0.148405	0.412974	0.856096	2034.54	1879.18	MLH1
ENST00000231887	0.534939	0.580471	0.909692	2238.11	2834	EHHADH
ENST00000231948	-0.235292	0.143015	0.694941	1576.48	1398.93	CRBN
ENST00000232003	NA	NA	NA	NA	NA	HRG
ENST00000232014	NA	NA	NA	NA	NA	BCL6
ENST00000232125	0.0647496	0.707571	0.939896	755	803.778	FAM162A
ENST00000232165	-0.682052	0.269129	0.793907	2449.65	1648.83	UBE3A
ENST00000232217	NA	NA	NA	NA	NA	RBP2
ENST00000232219	-0.0601941	0.852068	0.970962	720.4	721.75	RBP1
ENST00000232375	-0.204887	0.555018	0.902581	2439.56	2194.69	PFKFB4
ENST00000232424	-0.27627	0.00690152	0.270074	1231.82	1083.34	HES1
ENST00000232458	-0.0430698	0.894687	0.978906	1628.67	1511.89	ECT2
ENST00000232461	NA	NA	NA	NA	NA	GNAT1
ENST00000232496	-0.144014	0.154912	0.703163	860.688	767.037	TUSC2
ENST00000232501	-0.353103	0.00805181	0.287674	1245.62	1044.34	NPRL2
ENST00000232508	-0.0571661	0.588275	0.911548	1071.61	1055.17	CYB561D2
ENST00000232519	NA	NA	NA	NA	NA	C3orf14
ENST00000232564	-0.224457	0.138748	0.689533	1634.55	1398.95	GNB4
ENST00000232603	NA	NA	NA	NA	NA	MORC1
ENST00000232607	-0.132283	0.424179	0.859553	1510.68	1360.89	UMPS
ENST00000232744	0.270695	0.243454	0.774517	1323.24	1474.97	ABTB1
ENST00000232766	-0.475217	0.066852	0.572245	2135.93	1629.81	KLHL18
ENST00000232854	0.101449	0.410083	0.854688	1304.04	1390.82	HEMK1
ENST00000232888	-0.0829619	0.675124	0.932427	1237.68	1205.9	RRP9
ENST00000232892	NA	NA	NA	NA	NA	AADAC
ENST00000232905	-0.103445	0.0969252	0.630183	894.918	847.966	EIF1B
ENST00000232974	-0.333479	0.205285	0.745397	1864.48	1476.83	ZBTB47
ENST00000232975	-0.0602923	0.514453	0.890351	719.49	697.533	TNNC1
ENST00000232978	-0.400962	0.194722	0.736999	2197.22	1614.87	NKTR
ENST00000233025	-0.0393984	0.562867	0.903622	796.851	779.975	SPCS1
ENST00000233027	-0.388973	0.0777991	0.596222	1974.38	1597.6	NEK4
ENST00000233047	0.0665339	0.907294	0.982421	1184.56	1107.35	TMEM159
ENST00000233055	-0.0123231	0.936727	0.987955	1888.26	1852.02	WDFY1
ENST00000233057	-0.1605	0.302348	0.810932	1601.14	1476.94	EIF2AK2
ENST00000233072	-0.23684	0.438912	0.865915	2401.02	2210.44	CPS1
ENST00000233078	-0.0492827	0.739937	0.947344	1022.9	1046.64	DAZAP1
ENST00000233084	-0.127437	0.378525	0.84492	1911.39	1783.1	DDX1
ENST00000233099	-0.28446	0.59777	0.914404	2038.22	1850.94	HEATR5B
ENST00000233114	-0.148294	0.00176092	0.146633	1200.28	1115.93	MDH1
ENST00000233121	-0.137806	0.500141	0.886749	1498.57	1432.43	MAPRE3
ENST00000233143	-0.0187225	0.292179	0.805805	521.142	516.036	TMSB10
ENST00000233146	-0.40839	0.0349346	0.472059	2253.92	1850.93	MSH2
ENST00000233154	-0.327707	0.178525	0.72342	2062.63	1800.59	NCK2
ENST00000233156	-0.100633	0.272859	0.79715	1593.78	1480.77	TFPI
ENST00000233190	-0.178427	0.28627	0.803766	1924.88	1757.72	NDUFS1
ENST00000233202	NA	NA	NA	573	475	SLC11A1
ENST00000233242	NA	NA	NA	NA	NA	APOB
ENST00000233330	NA	NA	NA	3	790.333	RTKN
ENST00000233331	0.124889	0.346741	0.830868	837.523	925.711	INO80B
ENST00000233336	-0.343806	0.183358	0.727901	2034.63	1664.05	TTL
ENST00000233379	-0.0404285	0.76624	0.95211	1077.73	1024.34	FAHD2A
ENST00000233468	-0.0664285	0.0135381	0.348728	700.95	676.361	SF3B6
ENST00000233505	-0.082727	0.664631	0.929623	728.812	740.667	CENPA
ENST00000233535	0.012953	0.986443	0.996336	1172	1050	SLC30A3
ENST00000233545	-0.158831	0.0834124	0.607786	927.918	812.264	MPV17
ENST00000233557	-0.12447	0.342304	0.827815	1624.67	1481.17	NRBP1
ENST00000233575	-0.109096	0.516617	0.890791	1721.58	1610.85	SNX17
ENST00000233596	0.0278225	0.912358	0.98342	1063.62	1113.17	REEP6
ENST00000233607	0.00508882	0.986234	0.996278	1180	1333.72	APC2
ENST00000233609	-0.0332997	0.108728	0.650886	533.948	522.935	RPS15
ENST00000233612	NA	NA	NA	3	1134.67	GCA
ENST00000233615	-0.0286599	0.754315	0.949184	939.866	924.607	WBP1
ENST00000233616	-0.221116	0.302418	0.810932	1858.52	1745.4	MOGS
ENST00000233623	0.363262	0.287155	0.804136	1429.48	1706.42	TTC31
ENST00000233627	-0.0476951	0.0543882	0.539269	782.857	762.184	NDUFS7
ENST00000233630	0.0330958	0.794328	0.958326	909.766	920.759	PCGF1
ENST00000233638	NA	NA	NA	1	1780	TLX2
ENST00000233668	-0.0301627	0.917247	0.984028	1560.47	1562.36	DOK1
ENST00000233710	0.272773	0.544075	0.900002	1407	1581.3	ACADL
ENST00000233712	-0.857026	0.166727	0.712285	1160	690.75	EVA1A
ENST00000233714	-0.309185	0.674667	0.932397	911.75	859.5	LANCL1
ENST00000233735	NA	NA	NA	NA	NA	REG1A
ENST00000233741	-0.145871	0.40021	0.851802	1204.29	1141.94	FANCL
ENST00000233809	NA	NA	NA	2	816	IGFBP2
ENST00000233813	-0.356651	0.261786	0.789105	1673.45	1421.85	IGFBP5
ENST00000233826	NA	NA	NA	NA	NA	KCNJ13
ENST00000233838	-0.292505	0.0482118	0.520749	1215.65	986.341	GGCX
ENST00000233840	NA	NA	NA	NA	NA	NEU2
ENST00000233892	-0.306622	0.0521111	0.532271	1300.13	1047.75	MOB4
ENST00000233893	-0.0317223	0.0579316	0.550398	572.696	562.211	HSPE1
ENST00000233948	NA	NA	NA	1	527	WNT6
ENST00000233954	NA	NA	NA	NA	NA	IL1RL1
ENST00000233957	NA	NA	NA	1	613	IL18R1
ENST00000233969	-1.11076	0.0645101	0.567535	2155.67	1410.67	SLC9A2
ENST00000233997	NA	NA	NA	NA	NA	AZU1
ENST00000234038	-0.215937	0.0213581	0.411434	1257.2	1133.51	PPP1R7
ENST00000234040	-0.586772	0.357859	0.835072	2394.88	1636.89	PASK
ENST00000234071	-0.2688	0.173095	0.718043	981.7	832.945	PROC
ENST00000234091	-0.222504	0.161651	0.708476	1275.1	1128.23	ID2
ENST00000234111	-0.12798	0.161655	0.708476	1601.59	1495.65	ODC1
ENST00000234115	0.4499	0.180268	0.725274	1523.31	1799.45	PLEKHB2
ENST00000234142	NA	NA	NA	NA	NA	GREB1
ENST00000234160	-0.0645581	0.607713	0.916861	1552.15	1532.61	GORASP2
ENST00000234170	-0.274566	0.0539773	0.537227	1888.11	1675.11	CEBPZ
ENST00000234179	-0.261118	0.248317	0.77856	1778.45	1499.23	PRKD3
ENST00000234195	NA	NA	NA	NA	NA	RMDN2
ENST00000234198	-0.202896	0.417533	0.857244	1447.83	1319.52	DLX2
ENST00000234256	0.00672548	0.972336	0.994249	1950.2	1980.71	SLC1A4
ENST00000234296	0.0543143	0.698786	0.938537	1583.79	1601.92	ORC2
ENST00000234301	-0.344723	0.077374	0.595315	934.176	780.273	COX7A2L
ENST00000234310	-0.178766	0.540161	0.899151	1588.3	1447.52	PPP3R1
ENST00000234313	NA	NA	NA	NA	NA	PLEK
ENST00000234347	NA	NA	NA	1028	1044	PRTN3
ENST00000234371	NA	NA	NA	3	1018	KISS1R
ENST00000234389	NA	NA	NA	1	1303	GRIN3B
ENST00000234392	NA	NA	NA	574	830	VAX2
ENST00000234396	NA	NA	NA	NA	NA	ATP6V1B1
ENST00000234420	-0.403127	0.000294714	0.0638226	2127.7	1751	MSH6
ENST00000234453	-0.183676	0.231126	0.765919	1650.53	1428.77	PLEKHA3
ENST00000234454	-0.208926	0.0484201	0.521818	1249.2	1134.16	SPR
ENST00000234549	NA	NA	NA	1	517	FAM76A
ENST00000234590	-0.157273	0.0783905	0.5969	1440.66	1338.13	ENO1
ENST00000234626	-0.113836	0.696126	0.937784	1791.86	1762.35	CDC7
ENST00000234677	-0.155333	0.2441	0.775014	1631.71	1534.45	SARS
ENST00000234701	NA	NA	NA	NA	NA	CLCA1
ENST00000234739	0.0411137	0.866234	0.973622	1402.6	1440.5	BCL9
ENST00000234798	NA	NA	NA	NA	NA	TPSG1
ENST00000234816	NA	NA	NA	NA	NA	ANGPTL1
ENST00000234827	0.0569391	0.754891	0.949361	1296.65	1423.64	TCEANC2
ENST00000234831	-0.0733694	0.118599	0.663837	1269.11	1229.13	TMEM59
ENST00000234875	-0.0811365	0.0762689	0.593282	713.055	665.467	RPL22
ENST00000234961	NA	NA	NA	1	2923	OPRD1
ENST00000235090	-0.270311	0.103077	0.642044	1502.95	1309.1	WDR77
ENST00000235150	NA	NA	NA	NA	NA	RNF19B
ENST00000235180	NA	NA	NA	NA	NA	DLGAP3
ENST00000235307	-0.349056	0.0326936	0.463423	1368.72	1153.46	C1orf21
ENST00000235310	-0.181494	0.000108613	0.0395783	1050.66	959.854	MAD2L2
ENST00000235329	-0.568709	0.172506	0.717817	2450.96	2010.89	MFN2
ENST00000235332	0.0982715	0.66119	0.929204	1146.57	1290.25	MIIP
ENST00000235345	-0.42585	0.0917418	0.623611	1813.76	1479	SLC35D1
ENST00000235347	NA	NA	NA	NA	NA	PRAMEF10
ENST00000235349	NA	NA	NA	NA	NA	PRAMEF4
ENST00000235372	0.938032	0.45936	0.873835	1285.25	2419	PRDM2
ENST00000235382	-0.143319	0.239917	0.771641	1149.1	1073.68	RGS2
ENST00000235453	NA	NA	NA	1	1480	DENND1B
ENST00000235521	-0.246716	0.402284	0.852597	1395.28	1189.19	WARS2
ENST00000235532	0.3363	0.4832	0.881484	993	1185.75	OSCP1
ENST00000235628	NA	NA	NA	1	1273	NT5C1A
ENST00000235739	NA	NA	NA	NA	NA	SLAMF1
ENST00000235835	-0.153699	0.028778	0.445869	1174.16	1093.62	AKR7A2
ENST00000235932	-0.240828	0.803597	0.960285	813.5	794.5	RAB29
ENST00000235933	NA	NA	NA	1	1930	CD160
ENST00000236040	0.0713791	0.666315	0.929675	1500.37	1572.02	P3H1
ENST00000236051	-0.0445298	0.323342	0.819512	1173.36	1151.19	EBNA1BP2
ENST00000236067	-0.246603	0.19467	0.736999	693.556	612.25	ATP6V0B
ENST00000236137	-0.100931	0.619993	0.920527	2005.22	1926.84	SLC19A2
ENST00000236147	NA	NA	NA	1	1579	SELL
ENST00000236192	-0.0155044	0.950053	0.991413	1296.56	1260.7	VAMP4
ENST00000236255	NA	NA	NA	1803	1717	GRHL3
ENST00000236273	-0.00490309	0.930061	0.986032	1048.88	1045.08	SYF2
ENST00000236342	0.0229629	0.865486	0.973622	1222.27	1223.96	DHDDS
ENST00000236412	0.147121	0.506787	0.889399	928.933	1062.28	PPP1R8
ENST00000236495	NA	NA	NA	NA	NA	SLC5A9
ENST00000236671	-0.216964	0.472805	0.876292	1415.24	1362.42	CTSD
ENST00000236693	NA	NA	NA	NA	NA	COLEC11
ENST00000236698	-0.275906	0.561652	0.903113	1316	973.571	STAG1
ENST00000236709	NA	NA	NA	NA	NA	A4GNT
ENST00000236826	NA	NA	NA	NA	NA	MMP8
ENST00000236850	NA	NA	NA	NA	NA	APOA1
ENST00000236877	NA	NA	NA	NA	NA	SLC8A2
ENST00000236914	NA	NA	NA	NA	NA	NR5A2
ENST00000236918	NA	NA	NA	NA	NA	TNNT2
ENST00000236925	-0.367949	0.16087	0.70721	1725.76	1425.59	CAMSAP2
ENST00000236937	NA	NA	NA	NA	NA	FCGR2B
ENST00000236938	NA	NA	NA	NA	NA	FCRLA
ENST00000236957	-0.135674	0.00544843	0.244505	649.304	602.917	EEF1B2
ENST00000236959	-0.186236	0.281319	0.801185	1511.34	1404.65	ATIC
ENST00000236979	NA	NA	NA	NA	NA	TNP1
ENST00000236980	-0.557003	0.000169891	0.0496973	1887.36	1470.52	FASTKD2
ENST00000237014	NA	NA	NA	NA	NA	TTR
ENST00000237019	NA	NA	NA	NA	NA	B4GALT6
ENST00000237163	NA	NA	NA	970	2856.67	DOPEY1
ENST00000237172	NA	NA	NA	NA	NA	FILIP1
ENST00000237201	NA	NA	NA	NA	NA	SPACA1
ENST00000237247	NA	NA	NA	NA	NA	SGIP1
ENST00000237264	-0.11824	0.155382	0.703163	1284.86	1189.73	TBPL1
ENST00000237275	NA	NA	NA	1	1126	ZC2HC1B
ENST00000237281	-0.16068	0.288447	0.805004	2171.03	1939.92	FBXO30
ENST00000237283	-0.182314	0.496993	0.885291	1581.25	1441.52	ADAT2
ENST00000237289	0.0241772	0.91323	0.983609	1975.16	2046.4	TNFAIP3
ENST00000237305	-0.15844	0.172093	0.717693	2026.01	1916.59	SGK1
ENST00000237316	NA	NA	NA	NA	NA	TCF21
ENST00000237353	NA	NA	NA	NA	NA	PMFBP1
ENST00000237380	-0.130402	0.0888454	0.619517	1135.76	1033.07	MED28
ENST00000237449	NA	NA	NA	NA	NA	DNAH6
ENST00000237455	-0.412612	0.0770564	0.594587	2226.79	1810.34	RNF103
ENST00000237500	-0.0518451	0.00154563	0.137073	942.58	920.39	MYL12B
ENST00000237527	NA	NA	NA	NA	NA	GHRH
ENST00000237530	-0.206588	0.0974305	0.630437	1900.02	1722.21	RPN2
ENST00000237536	-0.18743	0.647133	0.927217	1594.62	1591.76	SOGA1
ENST00000237596	-0.633178	0.356155	0.834728	2113.64	1760.09	PKD2
ENST00000237612	0.0563759	0.920641	0.984254	1633.33	1561.6	ABCG2
ENST00000237623	NA	NA	NA	1466	362	SPP1
ENST00000237642	-0.0792293	0.629827	0.922377	1542.13	1462.45	STBD1
ENST00000237653	NA	NA	NA	NA	NA	ADH6
ENST00000237654	-0.261816	0.170562	0.716594	1757.8	1555.48	CCNI
ENST00000237696	-0.157936	0.336654	0.825188	1374.94	1245.93	RARRES1
ENST00000237822	-0.571406	0.176973	0.722284	2284.62	1879.11	LDAH
ENST00000237837	NA	NA	NA	NA	NA	FGF23
ENST00000237853	-0.127815	0.332969	0.823582	1893.56	1820.97	ELL2
ENST00000237858	0.0178873	0.592762	0.91318	805.348	811.821	GLRX
ENST00000237889	-0.0306594	0.0340579	0.469259	560.761	549.775	NDUFB3
ENST00000237937	-0.249109	0.0399633	0.487334	1313.13	1188.31	ZFAND5
ENST00000238018	-0.682545	0.53609	0.898139	1928	1388.83	GDA
ENST00000238044	NA	NA	NA	NA	NA	C2orf40
ENST00000238081	-0.140659	0.0916828	0.623611	1659.41	1531.46	YWHAQ
ENST00000238091	0.0506542	0.886833	0.977556	579	574.762	ITGB1BP1
ENST00000238112	-0.172697	0.370316	0.84198	1733.63	1606.34	CPSF3
ENST00000238146	-0.167997	0.185791	0.730141	1695.43	1515.44	DDX55
ENST00000238156	-0.233253	0.15369	0.703163	1585.52	1382.13	CCDC92
ENST00000238256	-0.0945575	0.815235	0.963463	1820.69	1857.07	FKBP15
ENST00000238341	1.02373	0.495981	0.885169	1579.83	3083.8	CNTRL
ENST00000238379	-0.210458	0.49157	0.883377	1055	844.909	HDHD3
ENST00000238497	-0.0837699	0.701712	0.939121	1495.72	1462.08	VPS4B
ENST00000238508	NA	NA	NA	NA	NA	SERPINB10
ENST00000238558	NA	NA	NA	NA	NA	GSC
ENST00000238561	-0.172143	0.521864	0.892572	1690.89	1562.5	ADCK1
ENST00000238607	NA	NA	NA	NA	NA	PGF
ENST00000238609	-0.00610972	0.88337	0.976934	491.367	491.389	IFI27L2
ENST00000238616	-0.0540404	0.844667	0.968543	1928.89	1813.24	NEK9
ENST00000238618	-0.0291582	0.789685	0.957258	645.769	618.047	ACYP1
ENST00000238628	0.240256	0.707221	0.939896	672	938.111	IFT43
ENST00000238633	0.441763	0.633569	0.924118	344.333	464	NPC2
ENST00000238647	-0.359277	0.153226	0.702828	1567.13	1283.85	IRF2BPL
ENST00000238651	-0.0596578	0.703998	0.939896	1465.17	1438.76	ACOT2
ENST00000238667	-0.977994	0.173347	0.718081	2664.6	1563	FLVCR2
ENST00000238682	0.135573	0.768623	0.952172	1457.67	1813.29	TGFB3
ENST00000238686	NA	NA	NA	2	1331	ZC2HC1C
ENST00000238688	-0.152514	0.202166	0.74327	416.4	386	SLIRP
ENST00000238714	-0.623511	0.0316076	0.460701	2473.14	1645.93	PAPOLG
ENST00000238721	-0.397266	0.000272862	0.0602372	1129.1	884.457	TP53I3
ENST00000238738	-0.0874068	0.48364	0.881589	1602.27	1538.1	RHOQ
ENST00000238788	-0.0420233	0.893024	0.978764	2049.39	2063.52	TMEM214
ENST00000238789	0.640925	0.0653344	0.568673	1379.59	2160.33	ATAD2B
ENST00000238823	-0.122912	0.432432	0.863146	1431.92	1329.41	FAM98A
ENST00000238831	-0.19795	0.135459	0.686642	1244.51	1124.78	YIPF4
ENST00000238855	0.157799	0.693349	0.937487	2523.4	2781.83	AFTPH
ENST00000238856	-0.202919	0.335536	0.824592	1506.38	1364.6	AFTPH
ENST00000238875	-0.336735	0.196191	0.737527	1722.29	1352.81	LGALSL
ENST00000238892	0.0424656	0.437246	0.865163	774.431	813.896	CRIPT
ENST00000238918	NA	NA	NA	NA	NA	ADGRB3
ENST00000238936	0.149711	0.616189	0.919958	1297.52	1436.14	MFSD13A
ENST00000238961	0.0864124	0.78385	0.956539	2037.55	2109.38	SLF2
ENST00000238983	NA	NA	NA	NA	NA	LIPF
ENST00000238994	-0.246664	0.00632311	0.261821	1728.22	1548.54	PPP1R3C
ENST00000239007	0.255461	0.143149	0.695008	2271	2501.39	MXI1
ENST00000239026	-0.223679	0.477598	0.87855	1299.92	1219.07	HELLS
ENST00000239032	NA	NA	NA	NA	NA	PRLHR
ENST00000239144	NA	NA	NA	NA	NA	HOXB8
ENST00000239151	0.328612	0.650982	0.928306	1036.75	1368.5	HOXB5
ENST00000239165	-0.199912	0.0168444	0.379033	975.901	883.022	HOXB7
ENST00000239174	NA	NA	NA	NA	NA	HOXB1
ENST00000239223	-0.21562	0.044419	0.507292	1637	1474.12	DUSP1
ENST00000239231	-0.091791	0.721965	0.943332	1671.17	1575.29	PANK3
ENST00000239243	-0.703829	0.445525	0.867435	1552.46	782.5	MSX2
ENST00000239316	-0.0952293	0.52825	0.894346	761.75	689.562	INSL4
ENST00000239347	NA	NA	NA	NA	NA	IFNA7
ENST00000239367	-0.0982017	0.599796	0.915044	1900.86	1700.21	LRP11
ENST00000239374	NA	NA	NA	2	964	CCDC170
ENST00000239440	-0.0514488	0.877199	0.975552	2397.18	2507.47	ARAP3
ENST00000239444	NA	NA	NA	NA	NA	PCDHB8
ENST00000239446	NA	NA	NA	2245.5	628	PCDHB10
ENST00000239449	-1.05097	0.0757082	0.591743	2197.75	1171.33	PCDHB14
ENST00000239450	NA	NA	NA	1	3281	PCDHB12
ENST00000239451	NA	NA	NA	NA	NA	SLC25A2
ENST00000239461	-0.573369	0.254434	0.783264	2066.83	1457.71	PRRX1
ENST00000239462	NA	NA	NA	NA	NA	TNN
ENST00000239587	NA	NA	NA	NA	NA	TTLL2
ENST00000239614	-0.311273	0.5076	0.889399	1493.8	1071.12	MSANTD2
ENST00000239666	-0.0584454	0.381702	0.846238	942.973	911.629	PDZD11
ENST00000239690	-0.294303	0.0107177	0.320135	1917.43	1613.21	NUDCD1
ENST00000239830	-0.0884551	0.609358	0.917721	1667.86	1559.8	CCDC77
ENST00000239849	NA	NA	NA	NA	NA	TNFSF11
ENST00000239859	0.372089	0.416533	0.857116	1468	1649	CCDC169
ENST00000239860	NA	NA	NA	NA	NA	CCDC169
ENST00000239878	-0.200341	0.177714	0.723023	1442.64	1304.16	UFM1
ENST00000239882	-0.266839	0.44442	0.866898	1982.12	1750.23	ELF1
ENST00000239891	-0.0643187	0.243221	0.774249	1077.23	1053.29	ALG5
ENST00000239906	-0.203783	0.41627	0.857116	1970.26	1814.41	FAM53C
ENST00000239926	-0.137976	0.573406	0.908073	1076.22	1071.33	MYOT
ENST00000239938	-0.130851	0.206868	0.746569	1292.23	1201.13	EGR1
ENST00000239940	-0.135242	0.0171107	0.380224	1534.36	1443.39	PFN2
ENST00000239944	-0.0811175	0.519721	0.891355	1099.36	1041.09	SERP1
ENST00000240050	-0.271562	0.0868893	0.614197	1452.41	1249.2	MTERF2
ENST00000240055	-0.0422949	0.732869	0.945347	1254.71	1212.68	NFYB
ENST00000240079	-0.115627	0.0952548	0.627259	807.58	764.424	WASHC3
ENST00000240093	-0.777993	0.701897	0.939121	1343	1185.67	FZD3
ENST00000240095	NA	NA	NA	NA	NA	SLC39A14
ENST00000240100	-0.314475	0.540168	0.899151	1877	1650.2	DUSP4
ENST00000240101	1.06406	0.146744	0.698421	568	1116	DUSP4
ENST00000240123	-0.0920095	0.585095	0.910723	1279.08	1239.54	SORBS3
ENST00000240132	NA	NA	NA	NA	NA	CHRNA2
ENST00000240139	-0.138721	0.488654	0.882412	1659.14	1585.93	PPP3CC
ENST00000240185	-0.0972286	0.207093	0.746575	1877.08	1769.24	TARDBP
ENST00000240189	NA	NA	NA	NA	NA	PRAMEF2
ENST00000240285	-0.234303	0.334938	0.824401	1741.54	1527.65	RDH10
ENST00000240304	-0.0679302	0.524157	0.893239	1046.91	1035.18	LUC7L3
ENST00000240306	0.0990734	0.819192	0.963845	1469.3	1613.42	DLX4
ENST00000240316	-0.216995	0.0790837	0.597245	1601.45	1465.32	COIL
ENST00000240328	NA	NA	NA	2	1939.5	TBX2
ENST00000240333	-0.0264767	0.731061	0.944847	1125.41	1090.65	SLC35B1
ENST00000240335	NA	NA	NA	NA	NA	TBX4
ENST00000240361	NA	NA	NA	NA	NA	TEX14
ENST00000240364	NA	NA	NA	NA	NA	FAM117A
ENST00000240423	-0.0430471	0.649648	0.928146	1819.61	1756.84	NCAPH
ENST00000240488	-0.137556	0.0582676	0.551132	852.377	781.143	MND1
ENST00000240499	NA	NA	NA	NA	NA	ZNF141
ENST00000240587	NA	NA	NA	NA	NA	TSHZ3
ENST00000240615	NA	NA	NA	NA	NA	TAS2R8
ENST00000240617	-0.416812	0.0261003	0.42968	1686.21	1365.16	PLBD1
ENST00000240618	-0.733145	0.0912704	0.622783	1023.25	569	KLRK1
ENST00000240619	NA	NA	NA	2	1846	TAS2R10
ENST00000240651	-0.344634	0.1616	0.708476	1614.91	1401.84	PYROXD1
ENST00000240652	NA	NA	NA	NA	NA	IAPP
ENST00000240662	NA	NA	NA	NA	NA	KCNJ8
ENST00000240687	NA	NA	NA	NA	NA	TAS2R7
ENST00000240691	NA	NA	NA	NA	NA	TAS2R9
ENST00000240719	NA	NA	NA	NA	NA	ZNF549
ENST00000240727	NA	NA	NA	NA	NA	ZSCAN18
ENST00000240731	0.20551	0.783049	0.956359	1561.5	1752	ZNF211
ENST00000240851	-0.114613	0.233698	0.766932	1501.52	1484.33	TFG
ENST00000240874	NA	NA	NA	NA	NA	KALRN
ENST00000240922	-0.25431	0.0209714	0.407744	1885.69	1654.86	NAA50
ENST00000241001	NA	NA	NA	NA	NA	PAX6
ENST00000241014	-0.557152	0.0168291	0.378985	1592.65	1177.07	MAPK8IP1
ENST00000241041	-0.33995	0.191768	0.734931	1432.14	1229.47	PEX16
ENST00000241051	0.0423461	0.81594	0.963606	1515.64	1558.64	DEPDC7
ENST00000241052	-0.282665	0.0116	0.332614	1640.55	1426.45	CAT
ENST00000241069	NA	NA	NA	389	229	ACHE
ENST00000241071	NA	NA	NA	NA	NA	FBXO24
ENST00000241124	NA	NA	NA	NA	NA	GJB6
ENST00000241125	NA	NA	NA	NA	NA	GJA3
ENST00000241256	NA	NA	NA	NA	NA	GHSR
ENST00000241261	-0.111029	0.597703	0.914349	1743.17	1669.38	TNFSF10
ENST00000241274	NA	NA	NA	NA	NA	SLITRK3
ENST00000241305	NA	NA	NA	NA	NA	CPXM2
ENST00000241337	-0.129224	0.432372	0.863115	478.6	437.333	GSTM2
ENST00000241356	NA	NA	NA	NA	NA	ADORA3
ENST00000241391	NA	NA	NA	2	549.5	GTDC1
ENST00000241393	-0.121176	0.0537851	0.536446	1636.22	1562.87	CXCR4
ENST00000241416	-0.415288	0.28408	0.802647	2499.56	2170.07	ACVR2A
ENST00000241436	-0.0407896	0.849788	0.970195	1711.3	1573.09	POLK
ENST00000241453	NA	NA	NA	NA	NA	FLT3
ENST00000241463	NA	NA	NA	1	538	RASL11A
ENST00000241502	-0.240635	0.0164428	0.374109	1898.7	1668.55	FYTTD1
ENST00000241600	-0.182979	0.0104328	0.319221	1256.75	1150.96	MRPS2
ENST00000241651	NA	NA	NA	NA	NA	MYOG
ENST00000241704	-0.031161	0.882399	0.976853	2012.04	2040.94	COPA
ENST00000241808	NA	NA	NA	NA	NA	PRM2
ENST00000241891	NA	NA	NA	NA	NA	OPN4
ENST00000242057	-0.0732132	0.729426	0.944847	1536.14	1501.2	AHR
ENST00000242059	-0.225329	0.546613	0.900646	2461.26	2361.01	SCRN1
ENST00000242066	NA	NA	NA	1	982	ETV1
ENST00000242067	-0.174315	0.644609	0.926854	2347.65	2162.07	BBS9
ENST00000242104	NA	NA	NA	NA	NA	OCM
ENST00000242108	-0.764708	0.256843	0.785557	1662	986.333	EEPD1
ENST00000242109	NA	NA	NA	1014	752	KIAA0087
ENST00000242140	NA	NA	NA	NA	NA	WIPF3
ENST00000242152	NA	NA	NA	NA	NA	NPY
ENST00000242159	-0.372193	0.067084	0.572357	1514.93	1279.78	HOXA7
ENST00000242208	NA	NA	NA	NA	NA	INHBA
ENST00000242209	-0.482343	0.0633941	0.566238	1942.19	1580.54	FKBP9
ENST00000242210	NA	NA	NA	5	970.2	NT5C3A
ENST00000242248	0.13233	0.761831	0.951292	1688	1965.29	POLM
ENST00000242249	NA	NA	NA	NA	NA	RAMP3
ENST00000242257	-0.0385619	0.8429	0.968157	1356.11	1355.52	MRM2
ENST00000242261	-0.102102	0.449489	0.868701	1078.71	1040.36	TWIST1
ENST00000242275	-0.603313	0.543935	0.900002	1296.11	1234.25	SLC25A51
ENST00000242285	-0.0243043	0.728935	0.944847	974.598	968.172	CLTA
ENST00000242310	NA	NA	NA	NA	NA	TAF1L
ENST00000242315	NA	NA	NA	NA	NA	PHF24
ENST00000242317	NA	NA	NA	NA	NA	DNAI1
ENST00000242323	-0.4531	0.0103199	0.317863	1779.29	1352.56	DCAF10
ENST00000242351	-0.110656	0.7274	0.944772	1927.07	1821.5	ZC3HAV1
ENST00000242375	NA	NA	NA	NA	NA	AKR1D1
ENST00000242462	NA	NA	NA	NA	NA	NEUROG3
ENST00000242465	-0.146505	0.234103	0.767154	1120.88	1008.22	SRGN
ENST00000242480	-0.630468	0.0170643	0.380224	2026.09	1355.06	EGR2
ENST00000242505	-0.0772523	0.545709	0.900243	1108.06	1067.38	FAM149B1
ENST00000242576	-0.193683	0.0431164	0.501857	1509.23	1357.33	UNG
ENST00000242577	-0.040664	0.103445	0.642307	710.215	695.554	DYNLL1
ENST00000242591	-0.0964483	0.60422	0.916394	1811.39	1728.41	IFT81
ENST00000242592	-0.0321275	0.901871	0.980772	1352.36	1358	ACADS
ENST00000242607	NA	NA	NA	1	1782	HVCN1
ENST00000242719	-0.242546	0.115351	0.658755	1670.11	1481.85	RNF11
ENST00000242728	-0.713549	0.310788	0.813782	1893.67	1226	BHLHE41
ENST00000242729	NA	NA	NA	NA	NA	SSPN
ENST00000242737	NA	NA	NA	NA	NA	ITPR2
ENST00000242770	-0.0821668	0.732532	0.945241	752.5	752.087	STX10
ENST00000242776	-0.117251	0.146468	0.698334	1288.98	1227.1	DDX39A
ENST00000242783	-0.2457	0.497693	0.885405	2065.53	1962.94	PKN1
ENST00000242784	-0.0484397	0.268816	0.793907	863.556	846.905	TRIR
ENST00000242786	-0.165393	0.695058	0.93753	1560.16	1522.84	ADGRE5
ENST00000242804	NA	NA	NA	4	923	ZNF442
ENST00000242810	0.914574	0.161065	0.707624	996.75	1603.2	KLHL24
ENST00000242819	NA	NA	NA	NA	NA	CCDC70
ENST00000242827	-0.0900216	0.0171433	0.380224	907.351	868.263	EBPL
ENST00000242839	NA	NA	NA	2	3983.5	ATP7B
ENST00000242848	0.00226801	0.989914	0.99705	1521.82	1450.84	ZC3H13
ENST00000242872	-0.143121	0.519223	0.891244	1271.34	1089.8	CENPK
ENST00000242994	NA	NA	NA	NA	NA	NEUROD4
ENST00000243045	-0.0524013	0.0561495	0.545406	693.601	669.783	ORMDL2
ENST00000243050	-0.0890023	0.599287	0.914704	1845.93	1734.02	NR4A1
ENST00000243052	NA	NA	NA	NA	NA	PDE1B
ENST00000243056	-0.172884	0.36945	0.841782	1638.19	1573.98	HOXC13
ENST00000243077	-0.406086	0.101979	0.640473	2505	2005.45	LRP1
ENST00000243082	0.0785041	0.851333	0.970758	918.714	930.75	HOXC11
ENST00000243103	NA	NA	NA	2	2771	HOXC12
ENST00000243108	-0.200565	0.634996	0.924682	1027.83	984.643	HOXC6
ENST00000243112	0.101639	0.0429176	0.500811	671.31	715.6	SMUG1
ENST00000243167	NA	NA	NA	NA	NA	FAAH
ENST00000243189	-0.205516	0.200581	0.741286	1122.29	1016.29	RSRP1
ENST00000243213	NA	NA	NA	NA	NA	IL13RA2
ENST00000243222	NA	NA	NA	NA	NA	COL10A1
ENST00000243253	-0.118373	0.426166	0.859569	2117.81	1947.27	SEC61A1
ENST00000243286	0.413427	0.225569	0.762913	771.7	899.364	TCEAL3
ENST00000243298	NA	NA	NA	NA	NA	RAB9B
ENST00000243300	NA	NA	NA	NA	NA	NRK
ENST00000243314	NA	NA	NA	NA	NA	MAGEA9
ENST00000243326	-0.073529	0.668439	0.929675	1991.42	1918.44	RIF1
ENST00000243344	-0.102632	0.68572	0.93588	1856.63	1708.59	TTC21B
ENST00000243346	-0.109022	0.266566	0.793459	1122.97	1060.43	NMI
ENST00000243347	-0.0482935	0.860968	0.97201	1177	1072	TNFAIP6
ENST00000243349	NA	NA	NA	NA	NA	ACVR1C
ENST00000243389	-0.85141	0.0123612	0.338073	2169.14	1252.32	SLC36A1
ENST00000243440	0.0830846	0.776819	0.95477	812.552	823.3	BATF3
ENST00000243457	NA	NA	NA	1157	1083.5	KCNJ2
ENST00000243498	0.100139	0.71232	0.94072	1265.52	1322.25	EXOSC9
ENST00000243501	-0.312999	0.000378623	0.0742853	1458.03	1150.41	PLA2G12A
ENST00000243563	-0.12006	0.0950343	0.626671	1118.39	1056.45	SNRPA
ENST00000243578	-0.243866	0.00812085	0.288255	880.776	773.882	B9D2
ENST00000243583	0.12273	0.495264	0.885169	867.564	1017.03	COQ8B
ENST00000243611	-0.158111	0.329068	0.821593	886.821	817.024	C4BPB
ENST00000243639	0.369973	0.462727	0.874177	1864.25	2252.12	ZNF468
ENST00000243643	NA	NA	NA	NA	NA	ZNF415
ENST00000243644	-0.148904	0.655755	0.92906	1941.57	1673.93	ZNF350
ENST00000243662	-0.245584	0.413388	0.856157	1340.42	1170.86	RAB38
ENST00000243673	0.166407	0.872233	0.974909	952	1235.2	GPR83
ENST00000243706	-0.246999	0.467146	0.874608	1516.87	1351.41	HAUS3
ENST00000243776	-0.267338	0.135028	0.685892	2189.22	1905.81	CHPF
ENST00000243786	NA	NA	NA	NA	NA	INHA
ENST00000243806	NA	NA	NA	NA	NA	FAM124B
ENST00000243810	1.49032	0.49351	0.884464	1575.6	2374	SP140L
ENST00000243878	-0.112309	0.298745	0.808754	1171.5	1113.71	ENKD1
ENST00000243893	-0.04935	0.850978	0.970698	320	312.5	UBE2C
ENST00000243896	-0.240236	0.292062	0.805785	1648.44	1492.02	SLC35C2
ENST00000243903	-0.415189	0.103943	0.642452	1885.3	1474.3	ACTR5
ENST00000243911	NA	NA	NA	NA	NA	MC3R
ENST00000243913	NA	NA	NA	NA	NA	GCNT7
ENST00000243914	NA	NA	NA	NA	NA	CTCFL
ENST00000243918	-0.0322832	0.852666	0.971056	1286.38	1230.32	SYS1
ENST00000243924	-0.278683	0.126045	0.674245	683.455	583.6	PI3
ENST00000243938	0.161403	0.223682	0.760609	545.5	613.625	WFDC3
ENST00000243964	NA	NA	NA	NA	NA	SLC12A5
ENST00000243997	-0.0167738	0.0513528	0.52978	456.468	450.851	ATP5E
ENST00000244007	-0.223273	0.487204	0.88213	2358.15	2280.41	PLCG1
ENST00000244020	-0.134951	0.220902	0.758218	1178.46	1096.55	SRSF6
ENST00000244040	-0.092611	0.554708	0.902581	1455.46	1366.16	RAB22A
ENST00000244043	NA	NA	NA	2	1093.5	PTGIS
ENST00000244049	NA	NA	NA	NA	NA	CDH26
ENST00000244050	-0.0794612	0.781314	0.955596	1375.62	1358.71	SNAI1
ENST00000244051	-0.0161944	0.923231	0.984951	1588.3	1554.04	MOCS3
ENST00000244061	-0.129714	0.252565	0.781513	1451.62	1367.97	RNF114
ENST00000244096	NA	NA	NA	NA	NA	MAGEA10
ENST00000244137	-0.0158613	0.899785	0.980549	1455.78	1463.8	PEPD
ENST00000244174	NA	NA	NA	3	959.333	IL9R
ENST00000244204	NA	NA	NA	3	750	NAGK
ENST00000244217	-0.0588435	0.50213	0.887969	875.977	861.955	MCEE
ENST00000244221	-0.374076	0.558073	0.902629	781.8	917	PAIP2B
ENST00000244227	-0.0666717	0.469124	0.874608	1081.45	1035.69	SNRNP27
ENST00000244230	-0.119972	0.496456	0.885169	1615.6	1496.55	MPHOSPH10
ENST00000244241	NA	NA	NA	NA	NA	IL17C
ENST00000244289	-0.272984	0.485743	0.881771	765.231	524.818	LIPE
ENST00000244293	NA	NA	NA	NA	NA	PSG9
ENST00000244295	NA	NA	NA	NA	NA	PSG4
ENST00000244296	NA	NA	NA	NA	NA	PSG1
ENST00000244303	NA	NA	NA	NA	NA	HIF3A
ENST00000244314	NA	NA	NA	NA	NA	IRGC
ENST00000244333	-0.150125	0.387447	0.847208	1469.75	1360.86	LYPD3
ENST00000244336	NA	NA	NA	NA	NA	CEACAM8
ENST00000244360	NA	NA	NA	1237	994	RNF39
ENST00000244364	-0.469326	0.0910289	0.622658	2843.32	2111.67	DST
ENST00000244426	-0.667854	6.06306e-05	0.0310136	1377.42	854.146	FBXO9
ENST00000244458	NA	NA	NA	1	2187	PACSIN1
ENST00000244496	-0.13908	0.078746	0.5969	1130.56	1059.09	RRP36
ENST00000244513	NA	NA	NA	NA	NA	BTN1A1
ENST00000244519	-0.248942	0.238279	0.770436	1924.77	1723.04	BTN3A3
ENST00000244520	-0.0232043	0.18975	0.734238	762.49	750.021	SNRPC
ENST00000244527	NA	NA	NA	NA	NA	SLC17A1
ENST00000244533	-0.0580894	0.938634	0.988499	1468.14	1497	ABCC10
ENST00000244534	NA	NA	NA	4	835.25	HIST1H1D
ENST00000244537	NA	NA	NA	NA	NA	HIST1H4F
ENST00000244546	-2.04511	0.13464	0.685649	1278	350.667	PEX6
ENST00000244565	NA	NA	NA	NA	NA	UNC5CL
ENST00000244571	-0.440345	0.0876214	0.615326	2174.16	1596.42	AARS2
ENST00000244573	NA	NA	NA	1	796	HIST1H1A
ENST00000244576	0.559969	0.808489	0.96174	820	2012.33	ZNF391
ENST00000244623	-0.867285	0.364824	0.838355	1627	950.2	OR2B6
ENST00000244645	NA	NA	NA	NA	NA	TCP11
ENST00000244669	NA	NA	NA	NA	NA	APOBEC2
ENST00000244670	-0.0153057	0.844884	0.968572	742.788	745.841	KLHDC3
ENST00000244709	NA	NA	NA	NA	NA	TREM1
ENST00000244711	-0.0393631	0.392116	0.848222	831.832	811.324	MEA1
ENST00000244728	NA	NA	NA	NA	NA	COL21A1
ENST00000244741	-0.089154	0.516966	0.890791	1639.45	1563.26	CDKN1A
ENST00000244745	-0.172812	0.213209	0.752231	1271.79	1160.01	SOX4
ENST00000244751	NA	NA	NA	1	2096	CPNE5
ENST00000244763	-0.307015	0.00496841	0.238058	1648.3	1402.16	SSR1
ENST00000244766	NA	NA	NA	NA	NA	NRN1
ENST00000244769	0.0454181	0.913105	0.983609	1559.08	1729.57	ATXN1
ENST00000244776	-0.670151	0.330331	0.822219	677.2	321	DEK
ENST00000244815	-0.346986	0.245303	0.776175	1578.94	1242.17	LRRFIP1
ENST00000244869	-0.2779	0.556807	0.902629	1714.3	1403.38	EREG
ENST00000244891	NA	NA	NA	NA	NA	TRIM51
ENST00000244906	NA	NA	NA	NA	NA	DKFZP434K028
ENST00000244926	NA	NA	NA	NA	NA	SCGB1D2
ENST00000244930	NA	NA	NA	NA	NA	SCGB2A1
ENST00000245046	-0.192171	0.0523948	0.532783	1083.42	971.267	EMC3
ENST00000245105	0.205869	0.640861	0.926162	1537.94	2097.45	SH3TC1
ENST00000245121	-0.656109	0.251035	0.780338	776	502	KATNAL2
ENST00000245157	-0.160654	0.322321	0.818846	2003.52	1864.67	BBS2
ENST00000245185	-0.00771396	0.441217	0.865915	460.393	459.619	MT2A
ENST00000245206	-0.232483	0.0877022	0.615592	1818.86	1598.08	GOT2
ENST00000245222	-0.418107	0.364697	0.83835	2270.33	1681.4	SPHK2
ENST00000245255	NA	NA	NA	NA	NA	PIWIL1
ENST00000245304	-0.0843496	0.494286	0.884872	1930.92	1841.66	RAP2A
ENST00000245312	NA	NA	NA	NA	NA	SLC10A2
ENST00000245323	-0.124718	0.5942	0.913675	2055.95	2026.26	EFNB2
ENST00000245382	-0.308324	0.739882	0.947342	459	399.556	C17orf53
ENST00000245407	0.00268442	0.988747	0.99652	1866.52	1868.95	SLC22A5
ENST00000245414	-0.467893	0.00763248	0.281834	1782.84	1405.22	IRF1
ENST00000245441	-0.571212	0.0786435	0.5969	2153.28	1636	NIN
ENST00000245448	NA	NA	NA	1	690	ATP5S
ENST00000245451	-0.480339	0.482206	0.881322	1799	1756.5	BMP4
ENST00000245457	-0.0805762	0.760201	0.950859	1657.14	1609.15	PTGER2
ENST00000245458	-0.00035391	0.975316	0.99448	359.746	359.825	RPS29
ENST00000245479	-0.173041	0.444669	0.867151	1863.28	1622.77	SOX9
ENST00000245503	NA	NA	NA	NA	NA	MYH2
ENST00000245539	-0.0653008	0.178303	0.723304	1066.05	1032.73	MRPS7
ENST00000245543	-0.0154626	0.964363	0.993637	1485.76	1535.67	ARMC7
ENST00000245544	-0.243934	0.0746613	0.588811	1747.22	1522.89	NUP85
ENST00000245551	-0.859606	0.34964	0.832608	1154.8	916.5	MIF4GD
ENST00000245552	-0.0528199	0.426863	0.859941	910.829	885.27	NT5C
ENST00000245564	0.334586	0.238776	0.770674	1047.76	1231.38	MSTO1
ENST00000245615	-0.245203	0.132232	0.682476	2014.71	1857.33	MBOAT7
ENST00000245618	0.256415	0.829475	0.965514	1414.2	1653.67	EPS8L1
ENST00000245620	NA	NA	NA	NA	NA	LILRB3
ENST00000245621	NA	NA	NA	NA	NA	LILRA6
ENST00000245663	-0.125087	0.510828	0.889971	539.222	503.733	ZBTB46
ENST00000245680	-0.239525	0.299684	0.808754	1769.83	1524.8	SLC35F5
ENST00000245787	-0.0950073	0.587825	0.911489	1535.51	1430.1	INSIG2
ENST00000245796	1.61628	0.00125946	0.128349	735.6	2090.4	PSD4
ENST00000245810	NA	NA	NA	NA	NA	PSPN
ENST00000245812	0.0129891	0.781446	0.955596	775.249	786.397	ALKBH7
ENST00000245816	-0.086652	0.224177	0.761036	999.301	957.751	CLPP
ENST00000245817	-0.0799161	0.542105	0.899507	1180.06	1113.26	TNFSF9
ENST00000245838	-0.495451	0.0353795	0.473282	2050.21	1603.41	THOC2
ENST00000245857	-0.0378702	0.239759	0.77151	409.668	398.332	RPL23
ENST00000245865	0.663125	0.256233	0.785159	1347.17	2042.67	STRADA
ENST00000245903	-0.169852	0.0365614	0.478375	865.642	808.133	CD70
ENST00000245907	-0.456227	0.0943294	0.625619	2313.49	1851.17	C3
ENST00000245908	0.0253958	0.834062	0.966934	2143.25	2196.85	SH2D3A
ENST00000245912	NA	NA	NA	NA	NA	TNFSF14
ENST00000245923	0.254736	0.381283	0.846238	884.889	1101.58	RTN2
ENST00000245925	-0.286614	0.189804	0.734303	1453.7	1302.68	EML2
ENST00000245932	-0.147377	0.192727	0.735349	1386.18	1325.77	VASP
ENST00000245934	0.0502986	0.883368	0.976934	1684.59	1818.14	SYMPK
ENST00000245957	NA	NA	NA	NA	NA	CFAP61
ENST00000245960	-0.219121	0.450964	0.869422	2231.18	2133.3	CDC25B
ENST00000245983	NA	NA	NA	NA	NA	GNRH2
ENST00000246006	NA	NA	NA	NA	NA	CD93
ENST00000246012	NA	NA	NA	NA	NA	CST8
ENST00000246015	-0.208161	0.436599	0.865163	1631.91	1414.45	PSMF1
ENST00000246020	NA	NA	NA	NA	NA	CSTL1
ENST00000246024	-0.281517	0.0078254	0.284137	1411.11	1181.61	TMX4
ENST00000246041	-0.548897	0.489437	0.882412	1318.73	1092.74	AP5S1
ENST00000246043	-0.167633	0.666091	0.929651	1759.27	1538.13	RRBP1
ENST00000246069	-0.160134	0.0071646	0.275107	1230.92	1130.46	DSTN
ENST00000246070	NA	NA	NA	NA	NA	LAMP5
ENST00000246071	-0.139102	0.042506	0.4993	1082.19	999.406	SNRPB2
ENST00000246080	NA	NA	NA	NA	NA	TCF15
ENST00000246081	NA	NA	NA	NA	NA	OTOR
ENST00000246090	NA	NA	NA	NA	NA	BANF2
ENST00000246100	-0.0929	0.846563	0.968842	1080.4	991	FAM110A
ENST00000246104	NA	NA	NA	NA	NA	SCRT2
ENST00000246105	NA	NA	NA	NA	NA	DEFB129
ENST00000246112	0.0332924	0.867452	0.973641	1011	1014.67	TLE6
ENST00000246115	NA	NA	NA	NA	NA	S1PR4
ENST00000246117	-0.206752	0.316641	0.815676	1837.29	1753.03	NCLN
ENST00000246139	NA	NA	NA	NA	NA	CITED1
ENST00000246151	-0.114825	0.27633	0.798898	1391.99	1291.6	PITHD1
ENST00000246163	-0.270763	0.408666	0.854421	899.556	853.333	MAX
ENST00000246166	-0.38228	0.0595219	0.553001	1849.41	1529.51	FNTB
ENST00000246174	-0.456839	0.245887	0.776781	2112.81	1647.44	ARMCX5
ENST00000246186	0.461921	0.058273	0.551132	468.55	690.842	MMP24
ENST00000246190	-0.0878092	0.654289	0.929026	1469.39	1456.35	NECAB3
ENST00000246194	-0.149144	0.0398265	0.48716	1290.91	1206.96	RALY
ENST00000246199	NA	NA	NA	NA	NA	C20orf173
ENST00000246229	0.128263	0.596821	0.914025	1874.76	2107.72	PLAGL2
ENST00000246314	-0.363206	0.463962	0.874243	1629	1481.14	AGO3
ENST00000246337	-0.0841238	0.031461	0.460501	1162.89	1116.19	UROD
ENST00000246421	NA	NA	NA	NA	NA	SLC35E2
ENST00000246489	0.356347	0.618312	0.92035	2063.75	3023.67	KLC1
ENST00000246505	-0.0330068	0.90641	0.982256	1290.4	1270.53	PCID2
ENST00000246515	NA	NA	NA	NA	NA	SLURP1
ENST00000246529	0.400766	0.466472	0.874608	940.571	1507.62	LRFN3
ENST00000246532	-0.083061	0.446083	0.867898	851.963	825.353	IGFLR1
ENST00000246533	0.0136622	0.927659	0.985994	1153.25	1175.23	CAPNS1
ENST00000246535	-0.0636136	0.520136	0.891801	1086.71	1052.47	PDCD2L
ENST00000246548	-0.165003	0.270337	0.793918	1687.56	1585.85	UBA2
ENST00000246549	NA	NA	NA	NA	NA	FFAR2
ENST00000246551	-0.270367	0.715821	0.941892	670.5	555	HCST
ENST00000246553	NA	NA	NA	NA	NA	FFAR1
ENST00000246554	-0.0117224	0.359338	0.835072	527.663	524.878	COX6B1
ENST00000246635	0.0079021	0.98455	0.996114	1295.8	1305.4	KRT13
ENST00000246639	NA	NA	NA	NA	NA	KRT35
ENST00000246646	NA	NA	NA	NA	NA	KRT38
ENST00000246657	NA	NA	NA	1	1833	CCR7
ENST00000246662	NA	NA	NA	2	699.5	KRT9
ENST00000246672	0.331049	0.195793	0.737351	1684.94	2002.54	NR1D1
ENST00000246747	-0.0106021	0.874624	0.975249	886.115	882.968	ARL2
ENST00000246784	-0.147289	0.252857	0.781552	907.968	839.163	BCL2L12
ENST00000246785	0.018396	0.765933	0.95211	912.025	919.771	BCL2L12
ENST00000246792	-0.0224099	0.680195	0.934359	926.625	920.865	RRAS
ENST00000246794	1.03141	0.414236	0.856426	569.5	962.5	PRRG2
ENST00000246801	NA	NA	NA	NA	NA	TSKS
ENST00000246802	-0.096639	0.354969	0.834608	1148.85	1103.61	NOP53
ENST00000246841	NA	NA	NA	2	606	FLRT1
ENST00000246868	-0.122316	0.0861507	0.612506	1304.97	1221.76	SBDS
ENST00000246891	NA	NA	NA	NA	NA	CSN1S1
ENST00000246895	NA	NA	NA	NA	NA	STATH
ENST00000246896	NA	NA	NA	NA	NA	HTN1
ENST00000246912	0.00198591	0.991388	0.997375	1361.99	1362	MLX
ENST00000246914	NA	NA	NA	NA	NA	WNK4
ENST00000246949	0.272511	0.643458	0.926782	1722	1593	DNASE1
ENST00000246957	-0.1894	0.120646	0.667037	1837.93	1673.83	TRAP1
ENST00000247001	-0.195267	0.443104	0.866486	1439.8	1354.26	SUGP1
ENST00000247003	-0.259893	0.0539947	0.537227	1192.03	1068.82	DDX49
ENST00000247005	NA	NA	NA	6	1766.67	GDF1
ENST00000247020	-0.0160405	0.766247	0.95211	1031.15	1012.14	SDF2
ENST00000247026	-0.0834995	0.688009	0.936245	1431.02	1302.02	NSRP1
ENST00000247087	-0.21814	0.656993	0.92906	1920.62	1858.84	AHDC1
ENST00000247138	-0.77539	0.326388	0.82059	1484.5	994.2	SLC35A2
ENST00000247140	-0.453459	0.390068	0.847568	424.2	350.8	PQBP1
ENST00000247153	NA	NA	NA	NA	NA	CFP
ENST00000247161	-0.210118	0.121541	0.668352	1637.71	1471.98	ELK1
ENST00000247178	-0.10265	0.747893	0.948805	1014.68	1003.76	ATG14
ENST00000247182	-0.435729	0.0517007	0.531193	1900.1	1501.8	SIX1
ENST00000247191	-0.698753	0.0734113	0.58641	2482.18	1867.43	DLGAP5
ENST00000247194	-0.0863852	0.507678	0.889399	1197.51	1123.69	L3HYPDH
ENST00000247207	-0.71289	0.484664	0.881589	2192.86	1948.33	HSPA2
ENST00000247219	NA	NA	NA	NA	NA	TBPL2
ENST00000247225	-0.17271	0.595629	0.9139	1891.41	1539.27	SGPP1
ENST00000247226	0.161742	0.755011	0.949361	1843.28	2143.72	PLEKHG3
ENST00000247270	NA	NA	NA	NA	NA	EVI2A
ENST00000247271	NA	NA	NA	1	984	OMG
ENST00000247291	-0.774158	0.223204	0.760441	1708.08	943.417	AIF1L
ENST00000247306	0.244732	0.0884045	0.617344	766	893.818	CTAG2
ENST00000247452	NA	NA	NA	NA	NA	MAGEC2
ENST00000247461	-0.188575	0.200458	0.741286	1801.73	1634	CANX
ENST00000247470	0.211108	0.37977	0.845764	703	846.529	PYCARD
ENST00000247655	-0.0314612	1.39053e-08	6.63861e-05	485.262	476.359	COX7C
ENST00000247665	-0.0232521	0.642148	0.926782	622.818	623.533	PHPT1
ENST00000247668	-0.20079	0.331074	0.822219	1629.9	1547.22	TRAF2
ENST00000247706	-0.163271	0.588394	0.911594	1352.43	1235.5	ABHD8
ENST00000247781	NA	NA	NA	1	500	COL14A1
ENST00000247815	0.0715253	0.811272	0.962129	1546.5	1804.06	HELB
ENST00000247829	-0.0336423	0.717033	0.941892	1136.92	1106.79	TSPAN8
ENST00000247833	-0.0242469	0.932036	0.986472	1795.22	1773.24	RAB3IP
ENST00000247843	-0.11075	0.189016	0.732975	1233.59	1148.89	YEATS4
ENST00000247866	-0.0103068	0.332699	0.82321	542.587	535.937	NDUFB2
ENST00000247879	NA	NA	NA	NA	NA	TAS2R3
ENST00000247881	NA	NA	NA	1	272	TAS2R4
ENST00000247883	NA	NA	NA	NA	NA	TAS2R5
ENST00000247930	-0.139965	0.581982	0.910083	1850.02	1965.51	ZNF777
[truncated: 65,608 more rows]
